# Supplementary material for: The Robust Traveling Salesman Problem with Time Windows Under Knapsack-Constrained Travel Time Uncertainty
Source: Atypon-hosted journal article supplement (doi:10.1287/trsc.2020.1011), 2020-12-08
Supplement: trsc.2020.1011.sm1.pdf [file trsc.2020.1011.sm1.pdf]

## EC.1. Proofs of statements

OBSERVATION 1. For any forward path  $P = (i_0, \dots, i_p)$  of  $G$  (with at least one arc) there exists a  $\mathbf{t} \in \mathcal{T}_K$  maximizing  $\tau_p^{\mathbf{t}}(P)$  and one subpath  $P' = (i_k, \dots, i_h)$  of  $P$  (possibly with  $h = k$ ) that satisfy:

1.  $t_{ij} = t_{ij}^0 + \delta_{ij}$  on all arcs  $(i, j)$  of  $P'$ , and
2.  $\tau_k^{\mathbf{t}}(P) = e_{i_k}$ , and
3.  $t_{i_h i_{h+1}} = t_{i_h i_{h+1}}^0 + \min \{ \delta_{i_h i_{h+1}}, r(P, k, h) \}$ , and  $t_{i_s i_{s+1}} = t_{i_s i_{s+1}}^0$ ,  $s = h + 1, \dots, p - 1$ .

*Proof.* Consider a  $\mathbf{t} \in \mathcal{T}_K$  maximizing  $\tau_p^{\mathbf{t}}(P)$  (which exists since  $\mathcal{T}_K$  is bounded). Let  $i_k$  be the last node visited by  $P$  before  $i_p$  such that  $\tau_{i_k}(\mathbf{t}) = e_{i_k}$  (possibly  $i_k = 0$ ), that is,  $i_k$  is a node such that any node  $i_s$  visited by  $P$  after  $i_k$  until  $i_p$  has  $\tau_s(\mathbf{t}) > e_{i_s}$ .

For each arc  $(i, j)$ , let  $\hat{t}_{ij} = t_{ij}^0 + \delta_{ij}$ . Consider the sequence of arcs  $(i_k, i_{k+1}), \dots, (i_{p-1}, i_p)$  traversed by  $P$ . Since  $\tau_p^{\mathbf{t}}(P)$  is maximized by  $\mathbf{t}$  and  $\tau_{i_k}(\mathbf{t}) = e_{i_k}$ , then either  $t_{i_s i_{s+1}} = \hat{t}_{i_s i_{s+1}}, \forall s = k, \dots, p - 1$ , or  $\delta(P, k, p) = \Delta$  and  $t_{i_h i_{h+1}} > t_{i_h i_{h+1}}^0$  for at least one arc  $(i_h, i_{h+1})$ ,  $k \leq h < p$ . In the former case, conditions 1. – 3. are obviously satisfied. In the latter case, let  $(i_h, i_{h+1})$ ,  $k \leq h < p$ , be the last arc of  $P$  satisfying  $t_{i_h i_{h+1}} > t_{i_h i_{h+1}}^0$  and let  $P'$  be the subpath from  $i_k$  to  $i_h$ . Now, if 1. is satisfied then also 3. is satisfied. So, suppose that 1. is not satisfied. Then, since  $\tau_s(\mathbf{t}) > e_{i_s}$  for all  $s = k + 1, \dots, p - 1$ , there exists another travel time vector  $\mathbf{t}' \in \mathcal{T}_K$  which can be obtained from  $\mathbf{t}$  by subtracting one unit from  $t_{i_h i_{h+1}}$  and adding one unit to another component  $t_{i_{h'} i_{h'+1}}$ , with  $k \leq h' < h$ , without decreasing  $\tau_s(\mathbf{t})$  for any  $s = k + 1, \dots, p$ . By repeatedly applying this procedure we can obtain a travel time vector  $\mathbf{t}'$  yielding  $\tau_{i_p}(\mathbf{t}') \geq \tau_{i_p}(\mathbf{t})$  that satisfies conditions 1. and 3.

OBSERVATION 3. Let  $\tau_h(P)$  be the nominal departure time at each node  $i_h$  of a path  $P = (i_0, \dots, i_p)$ . For any two nodes  $i_k$  and  $i_h$ ,  $k < h$ , let  $w(P, k, h)$  be the sum of the nominal waiting times  $w_s(P)$  at the nodes  $i_s$ ,  $s = k + 1, \dots, h$ . Then we have:

$$\tau_h^k(P) = \tau_h(P) + \delta(P, k, h) - w(P, k, h), \quad \forall h = 1, \dots, p, \quad \forall k \in \mathcal{I}_h(P).$$

*Proof.* For any  $k \in \mathcal{I}_h(P)$  the departure time  $\tau_h^k(P)$  is non-redundant implying that for any  $s = k + 1, \dots, h - 1$  we have  $\tau_s^k(P) > \tau_s(P) \geq e_{i_s}$ . Using this fact, definition (4) yields

$$\tau_s^k(P) = \tau_{s-1}^k(P) + t_{i_{s-1} i_s}^0 + \min \{ r(P, k, s - 1), \delta_{i_{s-1} i_s} \}, \quad \forall s = k + 1, \dots, h. \quad (6)$$

From this, using the definition of  $r(P, \cdot, \cdot)$  we get  $\tau_h^k(P) = \tau_k(P) + \sum_{s=k}^{h-1} t_{i_s i_{s+1}}^0 + \delta(P, k, h)$  which can be rewritten as in (6) since by definition of the waiting times  $w_s(P)$  we have  $\tau_h(P) = \tau_k(P) + \sum_{s=k}^{h-1} t_{i_s i_{s+1}}^0 + w(P, k, h)$ .

**DOMINANCE 1.** Under uncertainty set  $\mathcal{T}_K$  a forward path  $P = (i_0, \dots, i_p)$  dominates a forward path  $P' = (i'_0, \dots, i'_p)$  if (i)  $i'_{p'} = i_p$ , (ii)  $c^u(P) \leq c^u(P')$ , (iii)  $\tau(P) \leq \tau(P')$ , (iv)  $N(P) = N(P')$ , and (v) for each  $k \in \mathcal{I}(P)$  there exists one  $k' \in \mathcal{I}(P')$  such that

1.  $\tau(P) + \delta(P, k, p) - w(P, k, p) \leq \tau(P') + \delta(P', k', p') - w(P', k', p')$ , and
2.  $\tau(P) - w(P, k, p) \leq \tau(P') - w(P', k', p')$

*Proof.* It is easy to see that if  $P$  and  $P'$  satisfy conditions (i)–(v) then after extending both  $P$  and  $P'$  with a same arc those conditions will be satisfied again. Thus, it is enough to show that for any arc  $(j, v)$  conditions (i)–(v) guarantee that if the extension  $P' \oplus (j, v)$  of  $P'$  is feasible then the extension  $P \oplus (j, v)$  is also feasible, and has smaller or equal cost.

Note also that (i)–(iv) are the standard DP dominance conditions that are well known to be valid for the TSPTW. Therefore, we only need to consider condition (v). In particular, letting  $i'_{p'} = i_p = j$ , we will show that condition (v) guarantees that for any possible robust feasible extension  $P' \oplus (j, v)$  of  $P'$  the extension  $P \oplus (j, v)$  is also robust feasible.

Using the definition of the effective delay  $d(P, k, h)$  the robust feasibility condition for  $P' \oplus (j, v)$  can be written as:

$$\tau_v^k(P') = \tau_v(P') + d(P', k, v) \leq l_v \quad \forall k = 1, \dots, |P'| \quad (\text{EC.1})$$

To simplify the notation let  $\alpha_{jv}^k(P') = d(P', k, j) + \min\{\Delta - \delta(P', k, j), \delta_{jv}\} - w_v(P')$ . Note that  $d(P', k, v) = \max\{0, \alpha_{jv}^k(P')\}$ . Thus, the feasibility condition (EC.1) can be written as

$$\tau_v^k(P') = \tau_j(P') + t_{jv}^0 + w_v(P') + \max\{0, \alpha_{jv}^k(P')\} \leq l_v, \quad \forall k = 1, \dots, |P'|. \quad (\text{EC.2})$$

Let  $K'$  be the value of  $k$  that maximizes the left hand side of (EC.2). Similarly, let  $K$  be the maximizer of the left hand side of (EC.2) when  $P'$  is replaced with  $P$ . We need to show that  $\tau_v^K(P) \leq \tau_v^{K'}(P')$ , but notice that we only need to consider the case when  $\alpha_{jv}^{K'}(P) > 0$  because otherwise  $\tau_v^K(P)$  is the nominal service time at  $v$  on  $P$  which is clearly less than or equal than  $\tau_v^{K'}(P')$  due to (iii).

From (v), taking  $k = K$ , we know that there is  $k' \in \mathcal{I}(P')$  such that  $\tau_j(P) + d(P, K, j) \leq \tau_j(P') + d(P', k', j)$  and  $\tau_j(P) - w(P, K, j) \leq \tau_j(P') - w(P', k', j)$ . We now prove that

$$\tau_j(P) + \alpha_{jv}^K(P) + w_v(P) \leq \tau_j(P') + \alpha_{jv}^{k'}(P') + w_v(P'). \quad (\text{EC.3})$$

To see that (EC.3) holds, let  $q_{Kj} = \min\{\Delta - \delta(P, K, j), \delta_{jv}\}$  and let  $q_{k'j} = \min\{\Delta - \delta(P', k', j), \delta_{jv}\}$ . Consider the following two possible cases.

• If  $q_{Kj} = \Delta - \delta(P, K, j)$ , then we can write  $\tau_j(P) + \alpha_{jv}^K(P) + w_v(P) = \tau_j(P) + d(P, K, j) + \Delta - \delta(P, K, j) = \tau_j(P) - w(P, K, j) + \Delta$ . Now, if  $q_{k'j} = \Delta - \delta(P', k', j)$  then using the same observation we see that (EC.3) reduces to  $\tau_j(P) - w(P, K, j) + \Delta \leq \tau_j(P') - w(P', k', j) + \Delta$  which holds true due to point 2. of condition (v). Otherwise, we have  $q_{k'j} = \delta_{jv}$  and (EC.3) can be written as  $\tau_j(P) + d(P, K, j) + \Delta - \delta(P, K, j) \leq \tau_j(P') + d(P', k', j) + \delta_{jv}$ . Since  $q_{Kj} = \Delta - \delta(P, K, j)$  we have  $\Delta - \delta(P, K, j) \leq \delta_{jv}$  and thus (EC.3) holds true due to point 2. of condition (v).

• If  $q_{Kj} = \delta_{jv}$ , then we can write  $\tau_j(P) + \alpha_{jv}^K(P) + w_v(P) = \tau_j(P) + d(P, K, j) + \delta_{jv}$ . Now, if  $q_{k'j} = \Delta - \delta(P', k', j)$  then (EC.3) reduces to  $\tau_j(P) + d(P, K, j) + \delta_{jv} \leq \tau_j(P') + d(P', k', j) + \Delta - \delta(P', k', j)$ , and since  $q_{k'j} = \Delta - \delta(P', k', j)$  we have  $\Delta - \delta(P', k', j) \leq \delta_{jv} \leq \Delta - \delta(P, K, j)$  which implies  $\delta(P', k', j) \geq \delta(P, K, j)$ . Therefore (EC.3) holds true. On the other hand, if  $q_{k'j} = \delta_{jv}$  then (EC.3) reduces to  $\tau_j(P) + d(P, K, j) + \delta_{jv} \leq \tau_j(P') + d(P', k', j) + \delta_{jv}$  which is true because of point 1. of condition (v).

Finally, we can use (EC.3) together with (iii) which yields:

$$\begin{aligned}
 \tau_v^K(P) &= \tau_j(P) + t_{jv}^0 + \alpha_{jv}^K(P) + w_v(P) \\
 &\leq \tau_j(P') + t_{jv}^0 + \alpha_{jv}^{k'}(P') + w_v(P') \\
 &\leq \tau_j(P') + t_{jv}^0 + \max\{\alpha_{jv}^{k'}(P'), 0\} + w_v(P') \\
 &= \tau_v^{k'}(P') \leq \tau_v^{K'}(P').
 \end{aligned} \tag{EC.4}$$

OBSERVATION 4. Let  $P = (i_0, i_1, \dots, i_p)$ ,  $i_0 = 0$ , be a robust feasible forward path ending at node  $i_p$ . A relaxation of any feasible tour (w.r.t.  $\mathcal{T}_K$ ) that contains  $P$  is obtained by appending after  $P$  a backward *rng*-path  $\hat{P} = (\hat{i}_0, \hat{i}_1, \dots, \hat{i}_p)$  of minimum cost that starts from  $\hat{i}_0 = i_p = j$  and satisfies:

- (i)  $N(P) \cap N(\hat{P}) = \{j\}$ , where  $N(\hat{P})$  is the *ng*-set of  $\hat{P}$ ,
- (ii)  $\tau^{k'}(\hat{P}) \geq \tau^k(P) - \max\{(\delta(P, k, p) + \delta(\hat{P}, 0, k') - \Delta), 0\}$ ,  $\forall k \in \mathcal{I}(P)$ ,  $\forall k' \in \mathcal{I}(\hat{P})$ .

*Proof.* For any robust feasible tour that contains  $P$ , let  $\hat{P}$  be the path corresponding to the portion of the tour from node  $i_p$  to  $n + 1$ . Note that  $\hat{P}$  is a (elementary) backward *rng*-path. We show that  $\hat{P}$  must satisfy (ii) (being obvious that it must satisfy (i)).

By contradiction, suppose that (ii) is not true for some  $k \in \mathcal{I}(P)$  and  $k' \in \mathcal{I}(\hat{P})$ , that is,

$$\tau^{k'}(\hat{P}) < \tau^k(P) - \max\{(\delta(P, k, p) + \delta(\hat{P}, 0, k') - \Delta), 0\}. \tag{EC.5}$$

We have two cases.

**Case 1.**  $\delta(P, k, p) + \delta(\hat{P}, 0, k') \leq \Delta$ : Then, we can construct a  $\mathbf{t} \in \mathcal{T}_K$  such that  $\tau^k(P) = \tau^{\mathbf{t}}(P)$  and  $\tau^{k'}(\hat{P}) = \tau^{\mathbf{t}}(\hat{P})$ , and from (EC.5) we have that  $\tau^{\mathbf{t}}(P) > \tau^{\mathbf{t}}(\hat{P})$  meaning that the tour is not robust feasible. A contradiction.

**Case 2.**  $\delta(P, k, p) + \delta(\hat{P}, 0, k') > \Delta$ : Then, let  $D = \delta(P, k, p) + \delta(\hat{P}, 0, k') - \Delta$  so that from (EC.5) we have  $\tau^k(P) > \tau^{k'}(\hat{P}) + D$ . Let  $A_1 = \{(i_k, i_{k+1}), \dots, (i_{p-1}, i_p)\}$  be the set of arcs traversed by  $P$  from  $i_k$  to  $i_p$ , and  $A_2 = \{(\hat{i}_0, \hat{i}_1), \dots, (\hat{i}_{k'-1}, \hat{i}_{k'})\}$  be the set of arcs of  $\hat{P}$  from  $\hat{i}_0$  to  $\hat{i}_{k'}$ .

Consider a travel time vector  $\mathbf{t}$  with  $t_{ij} \in T_{ij}$ ,  $\forall (i, j) \in A$ ,  $t_{ij} = t_{ij}^0$ ,  $\forall (i, j) \in A \setminus (A_1 \cup A_2)$ , and such that  $\tau^k(P) = \tau^{\mathbf{t}}(P)$  and  $\tau^{k'}(\hat{P}) = \tau^{\mathbf{t}}(\hat{P})$ . We see that  $\mathbf{t} \notin \mathcal{T}_K$  because  $\delta(P, k, p) + \delta(\hat{P}, 0, k') = \Delta + D$  implies  $\sum_{(i,j) \in A} (t_{ij} - t_{ij}^0) \geq \sum_{(i,j) \in A_1} (t_{ij} - t_{ij}^0) + \sum_{(i,j) \in A_2} (t_{ij} - t_{ij}^0) = \Delta + D > \Delta$ . However, we can decrease by  $D$  units the components of  $\mathbf{t}$  that correspond to the arcs  $A_1 \cup A_2$  to obtain a vector  $\bar{\mathbf{t}} \in \mathcal{T}_K$ . Each unit decrease of a component  $t_{ij}$  with  $(i, j) \in A_1$  decreases  $\tau^{\mathbf{t}}(P)$  by at most one, and each unit decrease of a component  $t_{ij}$  with  $(i, j) \in A_2$  increases  $\tau^{\mathbf{t}}(\hat{P})$  by at most one. Starting from  $\mathbf{t}$ , which yields  $\tau^{\mathbf{t}}(P) - \tau^{\mathbf{t}}(\hat{P}) > D$ , and removing  $D$  units from its components corresponding to arcs  $A_1 \cup A_2$ , we can obtain a  $\bar{\mathbf{t}} \in \mathcal{T}_K$  with  $D = 0$  and such that  $\tau^{\bar{\mathbf{t}}}(P) > \tau^{\bar{\mathbf{t}}}(\hat{P})$ . This means that the tour is not robust feasible. A contradiction.

So, any robust feasible tour containing  $P$  has the form  $P \oplus \hat{P}$  where  $\hat{P}$  is a backward *rng*-path from  $j$  to  $n + 1$  (with  $j$  being the end node of  $P$ ) that must satisfy (i) and (ii).

## EC.2. Algorithm's modifications required to solve RTSPTW( $\mathcal{T}_C$ )

This section describes modifications to the DP algorithm of Section 6 that are needed for solving RTSPTW( $\mathcal{T}_C$ ). We first provide a characterization of robust feasibility that is valid for  $\mathcal{T}_C$  and then explain how to tailor steps 4.a, 4.b, 4.c and 4.d of the DP Algorithm 1 when using uncertainty set  $\mathcal{T}_C$ .

### EC.2.1. Robust feasibility with respect to $\mathcal{T}_C$

A robust (multi-vehicle) routing problem with uncertainty set  $\mathcal{T}_C$  was studied by Agra et al. (2013) and subsequently by Munari et al. (2019). In particular, Agra et al. provided an  $O(n\Gamma)$  algorithm for testing the robust feasibility of a path  $P = (i_0, \dots, i_p)$  that can be described as follows. Let  $\tau_h^\gamma(P)$  be the earliest departure time from node  $i_h$  of  $P$  with respect to any travel time vector  $\mathbf{t} \in \mathcal{T}_C$  where  $\gamma$  arcs  $(i, j)$  traversed by the subpath  $(i_h, \dots, i_p)$  can

have  $t_{ij} = t_{ij}^0 + \delta_{ij}$ . More briefly, we say that  $\tau_h^\gamma(P)$  is the departure time of  $P$  from  $i_h$  when  $\gamma$  arcs of  $P$  can have delay. The entire set of departure times  $\tau_h^\gamma(P)$  can be computed by the recursion:

$$\tau_h^\gamma(P) = \max\{\tau_{h-1}^\gamma(P), \tau_{h-1}^{\gamma-1}(P) + t_{i_{h-1}i_h}^0 + \delta_{i_{h-1}i_h}\} \quad \forall h = 1, \dots, p, \quad \forall \gamma = 1, \dots, \Gamma_h \quad (\text{EC.6})$$

where  $\Gamma_h = \min\{\Gamma, h\}$  and we initialize  $\tau_h^0(P) = \tau_h(P)$  for all  $h = 0, \dots, p$ . Path  $P$  is robust feasible if  $\tau_h^{\Gamma_h}(P) \leq l_{i_h}$ ,  $\forall h = 1, \dots, p$ . In this case, we define for each node  $i_h$  of  $P$  the set  $\mathcal{S}_h(P)$  of non-redundant departure times from  $i_h$  as the set of all  $\tau_h^\gamma(P)$ ,  $\gamma = 1, \dots, \Gamma_h$ , such that there is no  $\gamma' < \gamma$  yielding  $\tau_h^{\gamma'}(P) \geq \tau_h^\gamma(P)$  (note that  $\mathcal{S}_h(P)$  includes  $\tau_h(P)$ ).

To simplify the notation, in the following we drop the subscript  $p$  from  $\tau_p^\gamma(P)$ ,  $\mathcal{S}_p(P)$  and  $\mathcal{I}_p(P)$  when  $P = (i_0, \dots, i_p)$  is a forward path ending with last node  $i_p$ .

### EC.2.2. Feasibility test and dominance with respect to $\mathcal{T}_C$

Under uncertainty set  $\mathcal{T}_C$  an extension of a path  $P = (i_0, \dots, i_{p-1})$  with an arc  $(i_{p-1}, i_p)$  at Step 4.a of Algorithm 1 is tested for feasibility by using recursion (EC.6) with  $i_h = i_p$ .

With regard to the dominance tests at Steps 4.c and 4.d, the dominance rule described in Section 6.1 cannot be used. However, Munari et al. (2019) proposed a valid dominance that they used within a DP algorithm to generate routes for the Robust Vehicle Routing Problem with Time Windows under uncertainty set  $\mathcal{T}_C$ . This dominance rule is also valid for the robust TSPTW with uncertainty set  $\mathcal{T}_C$ . Our algorithms use the following slight generalization of that rule.

**Dominance 2** *A forward path  $P = (i_0, \dots, i_p)$  dominates a forward path  $P' = (i'_0, \dots, i'_p)$  if (i)  $i'_p = i_p$ , (ii)  $c^u(P) \leq c^u(P')$ , (iii)  $\tau(P) \leq \tau(P')$ , (iv)  $N(P) \subseteq N(P')$ , (v)  $\tau^\gamma(P) \leq \tau^\gamma(P')$   $\forall \gamma = 1, \dots, \min\{\Gamma_p, \Gamma_{p'}\}$  and (vi)  $\tau^\gamma(P) \leq \tau^{\gamma'}(P')$  where  $\gamma = \Gamma_p$  and  $\gamma' = \Gamma_{p'}$ .*

Note however that when Algorithm 1 is used to generate an optimal tour condition (iv) of Dominance 2 must be modified to  $N(P) = N(P')$  and condition (v) reduces to  $\tau^\gamma(P) \leq \tau^\gamma(P')$ ,  $\forall \gamma = 1, \dots, \Gamma_p$ . In this case, Dominance 2 coincides with that of Munari et al. (2019). We do not provide a formal proof for the correctness of Dominance 2 as it is a straightforward extension of Proposition 4.1 of Munari et al. (2019).

### EC.2.3. Computation of $lb(P)$ for a forward $rng$ -path $P$ under uncertainty set $\mathcal{T}_C$

The only difference with respect to the method described in Section 6.2.1 is that the index  $k^*$  used to compute the earliest departure time  $\tau^{k^*}(P)$  of the backward  $ng$ -paths included in the set  $\mathcal{B}(P)$  is computed as  $k^* = \Gamma_p$ .

#### EC.2.4. Computation of $lb(P)$ for a forward path $P$ under uncertainty set $\mathcal{T}_C$

Under uncertainty set  $\mathcal{T}_C$  a backward *rng*-path  $\hat{P} = (\hat{i}_0, \hat{i}_1, \dots, \hat{i}_p)$  is associated with a set of departure times  $\tau_h^\gamma(\hat{P}), \forall h = 0, \dots, p-1, \forall \gamma = 0, \dots, \Gamma_{p-h+1} = \min\{\Gamma, p-h+1\}$ , each representing the worst-case departure time from node  $\hat{i}_h$  that is feasible with respect to a travel time vector  $\mathbf{t} \in \mathcal{T}_C$  where  $\gamma$  arcs  $(i, j)$  of the subpath  $(\hat{i}_h, \dots, \hat{i}_p)$  have  $t_{ij} = t_{ij}^0 + \delta_{ij}$ . These times can be computed using recursion (EC.6) in a backward manner. Path  $\hat{P}$  is robust feasible if  $\tau_h^{\hat{\gamma}}(\hat{P}) \geq e_{\hat{i}_h}, \forall h = 0, \dots, p-1, \hat{\gamma} = \Gamma_{p-h+1}$ .

Let  $P = (i_0, i_1, \dots, i_p)$  be a robust feasible forward path ending at node  $i_p = j$ . To compute  $lb(P)$  with respect to  $\mathcal{T}_C$  we can adapt Observation 4 in a straightforward way by replacing condition (ii) with the following:

$$\tau^\gamma(P) - \tau^{\bar{\gamma}}(\hat{P}) \geq 0, \quad \forall \gamma = 1, \dots, \Gamma_p, \quad (\text{EC.7})$$

where  $\bar{\gamma} = \Gamma - \gamma$  and  $\tau^{\bar{\gamma}}(\hat{P}) = \tau_0^{\bar{\gamma}}(\hat{P})$  is the worst-case departure time from the first node  $\hat{i}_0$  of the backward path  $\hat{P}$  when  $\bar{\gamma}$  of its arcs can have maximum delay.

Thus, a lower bound  $lb(P)$  on the smallest cost of a tour containing  $P$  is obtained by adding to the cost of  $P$  the smallest cost of a backward *rng*-path  $\hat{P}$  that starts from  $i_p$  and satisfies  $N(P) \cap N(\hat{P}) = \{j\}$  (where in  $N(\hat{P})$  denotes the *ng*-set of  $\hat{P}$ ) plus condition (EC.7). However we actually use a weaker version of condition (EC.7) that only considers  $\gamma = \Gamma_p$ .

Accordingly, let  $\mathcal{Q}$  be the set of all backward *rng*-paths  $\hat{P}$ , computed with respect to  $\mathcal{T}_C$  using Algorithm 1, that have a modified cost (i.e., cost computed with respect to the modified arc costs  $c_{ij}^u$ ) less than *gap*. Let  $\mathcal{Q}(P) \subseteq \mathcal{Q}$  be the subset of backward *rng*-paths  $\hat{P}$  starting from  $\hat{i}_0 = i_p$  and satisfying condition (ii) of Observation 4 plus condition (EC.7) for  $\gamma = \Gamma_p$ . Algorithm 1 computes the label  $lb(P)$  of path  $P$  as follows:

$$lb(P) = c^u(P) + \min_{\hat{P} \in \mathcal{Q}(P)} c^u(\hat{P}). \quad (\text{EC.8})$$

Note that the set  $\mathcal{Q}$  must be pre-computed before running the DP Algorithm 1 in Phase 2 of the exact algorithm.

#### EC.3. Further algorithmic details

This section provides some algorithmic details that were omitted in the main paper for the sake of brevity. Specifically, the first two subsections detail the components of the lower

bounding procedure used in Phase 1 by the exact algorithm of Section 5 (regardless of the uncertainty set considered). The last section describes heuristic speedups used by the DP algorithm of Section 6 for testing Dominance 1 and 2 with regard to uncertainty set  $\mathcal{T}_K$  and  $\mathcal{T}_C$ , respectively.

**EC.3.1. Description of Step 1 of the lower bounding procedure**

The Lagrangean dual used at Step 1 is obtained from CSP by dualizing all constraints (8) except the one of node  $i = 0$ , and is solved approximately by executing a limited number  $\nu$  of iterations of the subgradient algorithm. Letting  $\lambda$  be a penalty vector associated with constraints (8) where  $\lambda_0 = 0$ , and defining  $c_{ij}^\lambda = c_{ij} - \frac{1}{2}\lambda_i - \frac{1}{2}\lambda_j$ ,  $\forall (i, j) \in A$ , (with the convention  $\lambda_{n+1} = 0$ ), the Lagrangean problem solved at each iteration is to find a *rng*-tour of minimum cost with respect to costs  $c_{ij}^\lambda$ . The main operations at each iteration are the following.

The DP algorithm of Section 1 is run with input parameters  $\mathbf{u} = \lambda$ ,  $\eta = 1$  and  $gap = \infty$  to find a tour  $P^\lambda = (i_0 = 0, i_1, \dots, i_p = n + 1)$  of minimum modified cost  $c^\lambda(P^\lambda) = \sum_{k=0}^{p-1} c_{i_k i_{k+1}}^\lambda$ . Let  $\alpha_i$  be the number of times that  $P^\lambda$  visits node  $i$ . A lower bound on the optimal cost of CSP is computed as  $L(\lambda) = c^\lambda(P^\lambda) + \sum_{i=0}^n \lambda_i$ , and tour  $P^\lambda$  is made elementary (removing eventual multiple visits to each node) and stored in a set  $\mathcal{P}$ . A subgradient  $\mathbf{s}$  is calculated as  $s_i = 1 - \alpha_i$ ,  $\forall i = 1, \dots, n$  and the penalties are updated as  $\lambda_i := \lambda_i + \theta s_i$ ,  $i = 1, \dots, n$ , where  $\theta$  is computed as (see, e.g., Baldacci et al. 2008):

$$\theta = \phi \frac{0.2 \cdot lb}{\sum_{i=1}^n s_i^2}. \tag{EC.9}$$

The value of  $\phi$  is initialized equal to 1.99 and multiplied by 0.999 at each iteration.

**EC.3.2. Description of Step 2 of the lower bounding procedure**

Step 2 is based on the following theorem from Baldacci et al. (2012) that we restate here. We refer to Baldacci et al. (2012, 2008) and references therein for a proof and the rationale behind the lower bounding procedure described below.

**Theorem 1** *Let  $\lambda_j \in \mathbb{R}$ ,  $j = 0, \dots, n$  and let  $\bar{\mathcal{L}} \subseteq \mathcal{L}$  be the index-set of any subset of *rng*-tours that correspond to columns of CSP. The following is a feasible solution to the dual of CSP:*

$$u_j = \min_{\ell \in \bar{\mathcal{L}}_j} \left\{ \frac{c_\ell^\lambda}{a(\ell)} \right\} + \lambda_j, \quad \forall j = 1, \dots, n \quad \text{and} \quad u_0 = \lambda_0 \tag{EC.10}$$

where  $\bar{\mathcal{L}}_j \subseteq \mathcal{L}$  indexes the subset of tours visiting  $j$ ,  $c_\ell^\lambda$  is the cost of  $rng$ -tour  $P_\ell$  with respect to costs  $c_{ij}^\lambda$ ,  $a_{j\ell}$  equals the number of times that  $P_\ell$  visits  $j$  and  $a(\ell) = \sum_{j=1}^n a_{j\ell}$ . The cost of solution  $\mathbf{u}$  computed as above equals  $\bar{L}(\lambda) = \sum_{j=0}^n u_j$ .

Step 2 executes a dual ascent procedure that starts with a vector  $\lambda = (\lambda_0, \dots, \lambda_n)$  of Lagrangean multipliers and the set  $\mathcal{P}$  of tours collected at Step 1 (plus the best tour found by the GVNS). Let  $\bar{\mathcal{L}}$  be the index set of the  $rng$ -tours in  $\mathcal{P}$  and let  $\bar{\text{CSP}}$  denote CSP where  $\mathcal{L}$  is replaced with  $\bar{\mathcal{L}}$ . The procedure executes a pre-defined number  $\nu_1$  of macro-iterations.

At each macro-iteration,  $\nu_2$  iterations of the subgradient algorithm are executed to approximately maximize  $\bar{L}(\lambda)$ . At each such iteration,  $\mathbf{u}$  is computed using (EC.10), and a subgradient at point  $\lambda$  is computed as  $s_i = 1 - \sum_{j=1}^n \frac{a_{i\ell_j}}{a(\ell_j)}$ ,  $\forall i = 0, \dots, n$ , where  $\ell_j \in \bar{\mathcal{L}}_j$  is the index of the tour that minimizes the right hand side of (EC.10). The penalty vector  $\lambda$  is then updated as in Step 1 (see Section EC.3.1), but here the value of parameter  $\phi$  is initialized equal to 1.5 and multiplied by 0.9 after any sequence of 60 iterations where the value  $\bar{L}(\lambda)$  does not increase with respect to the largest found so far.

After the  $\nu_2$  iterations let  $\bar{\mathbf{u}}$  be the best (i.e., with largest cost) dual solution found. The pricing problem is solved by the DP algorithm of Section 6 with input parameters  $\mathbf{u} = \bar{\mathbf{u}}$ ,  $\eta = 600$  and  $gap = -0.00001$ , and all the  $rng$ -tours it finds are added to  $\mathcal{P}$ . If no tours are found, then  $\bar{\mathbf{u}}$  is feasible for the dual of CSP and its cost is a valid lower bound on  $z(\text{CSP})$ .

After the  $\nu_1$  macro-iterations, the best feasible dual solution of CSP that was found, say  $\tilde{\mathbf{u}}$ , is returned. The best lower bound found by Step 2 is the cost of  $\tilde{\mathbf{u}}$ .

### EC.3.3. Heuristic speedup of Dominance 1 and 2

This section describes how the tests for Dominance 1 and 2 are heuristically made faster by the DP algorithm used at Step 2 of the lower bounding procedure (see Section EC.3.2).

1. When solving  $\text{RTSPTW}(\mathcal{T}_K)$ , Dominance 1 is used. Let  $P = (i_0, \dots, i_p)$  and  $P' = (i'_0, \dots, i'_p)$  be the two paths to be compared ( $P'$  being the candidate for being dominated) and suppose that conditions (i) – (iv) are satisfied. Let  $k_1 = \arg \max_{k \in \mathcal{I}(P)} \{\delta(P, k, p) - w(P, k, p)\}$  be the scenario yielding maximum effective delay at  $i_p$  for path  $P$ . Let also  $k_2 = \arg \min_{k \in \mathcal{I}(P)} \{w(P, k, p)\}$  be the scenario yielding minimum cumulated waiting time at  $i_p$  for path  $P$ .

The heuristic dominance replaces condition (v) with:

- $\tau(P) + \delta(P, k_1, p) - w(P, k_1, p) \leq \tau(P') + \delta(P', k'_1, p') - w(P', k'_1, p')$  and

- $\tau(P) - w(P, k_2, p) \leq \tau_{p'}(P') - w(P', k'_2, p')$

2. When solving  $\text{RTSPTW}(\mathcal{T}_C)$ , Dominance 2 is used. Let  $P = (i_0, \dots, i_p)$  and  $P' = (i'_0, \dots, i'_p)$  be the two paths to be compared ( $P'$  being the candidate to be dominated) and suppose that conditions  $(i) - (iv)$  and  $(vi)$  are satisfied. The heuristic dominance replaces condition  $(v)$  with  $\tau^{\bar{\gamma}}(P) \leq \tau^{\bar{\gamma}}(P')$  where  $\bar{\gamma} = \min\{\Gamma_p, \Gamma_{p'}\}$ .

In both cases, at the first iteration in which the DP algorithm uses the heuristic dominance, but fails to find a *rng*-tour of negative reduced cost the heuristic is (permanently) disabled and the DP algorithm is executed again.

#### EC.4. Graph preprocessing

This section explains the preprocessing steps that we use to a-priori tighten time windows and remove infeasible arcs. Note that these preprocessing steps differ depending on the uncertainty set used, as is detailed below.

To pre-process the graph at the beginning of Phase 1 of the exact algorithm, the following steps are iteratively applied. Preprocessing stops after an iteration where no change to the graph  $G$  occurs (one iteration consists of executing all the steps below).

We use the following notation. For each arc  $(i, j) \in A$  we denote by  $t_{ij}^0$  its nominal travel time and by  $\hat{t}_{ij} = t_{ij}^0 + \delta_{ij}$  its peak travel time (where we assume  $\delta_{ij} \leq \Delta$ ). Moreover, for any two nodes  $i$  and  $j$  (not necessarily adjacent), we denote by  $s_{ij}$  the minimum cost of a path in  $G$  from  $i$  to  $j$  that is computed using as arc costs the nominal travel times  $t_{ij}^0$ . Finally, we write  $i \prec j$  to indicate that node  $i$  must precede  $j$  in any solution.

*Time windows tightening:*

1. Let  $\bar{e}_i := \min_{\substack{(j,i) \in A \\ j \neq n+1}} \{e_j + t_{ji}^0\}$  and set  $e_i := \max\{\bar{e}_i, e_i\}$ ,  $\forall i \in N \setminus \{0, n+1\}$ .
2. Let  $\bar{e}_i := \min\{l_i, \min_{\substack{(i,j) \in A \\ j \neq 0, n+1}} \{e_j - \hat{t}_{ij}\}\}$  and set  $e_i := \max\{\bar{e}_i, e_i\}$ ,  $\forall i \in N \setminus \{0, n+1\}$ .
3. Let  $\bar{l}_i := \max\{e_i, \hat{t}_{0i}, \max_{\substack{(j,i) \in A \\ j \neq 0, n+1}} \{l_j + \hat{t}_{ji}\}\}$  and set  $l_i := \min\{\bar{l}_i, l_i\}$ ,  $\forall i \in N \setminus \{0\}$ .
4. Let  $\bar{l}_i := \max_{\substack{(i,j) \in A \\ j \neq 0}} \{l_j - t_{ij}^0\}$  and set  $l_i := \min\{\bar{l}_i, l_i\}$ ,  $\forall i \in N \setminus \{0, n+1\}$ .

*Simple arc eliminations:*

1. Remove from  $A$  all arcs  $(i, j)$  such that  $e_i + \hat{t}_{ij} > l_j$ .

*Minimum delay paths:*

This step differs depending on the uncertainty set used. Its purpose is to compute, for each pair of nodes  $i, j \in N$ , a lower bound on the amount of delay that can be incurred in a worst-case scenario when traveling from  $i$  to  $j$  (not necessarily directly).

1. With uncertainty set  $\mathcal{T}_K$ , a lower bound  $\hat{\delta}_{ij}$  on the amount of delay from  $i$  to  $j$  can be computed simply as  $\hat{\delta}_{ij} = \min\{\Delta, \delta_{ij}^*\}$  where  $\delta_{ij}^*$  is the cost of a shortest path from  $i$  to  $j$  in  $G$  that is computed using as arc costs the values  $\delta_{ij}$ .
2. With uncertainty set  $\mathcal{T}_C$ , let the  $\gamma$ -delay of a path  $P_{ij}$  from  $i$  to  $j$  be the quantity  $\max_{S \subseteq A(P_{ij}), |S| \leq \gamma} \{\sum_{(i,j) \in S} \delta_{ij}\}$ ,  $\forall \gamma = 0, \dots, \min\{|A(P_{ij})|, \Gamma\}$ , where  $A(P_{ij})$  is the set of arcs traversed by  $P_{ij}$ . We denote by  $\hat{\delta}_{ij}(\gamma)$  the minimum  $\gamma$ -delay of any path in  $G$  from  $i$  to  $j$ . Once fixed a start node  $s$ , the values  $\hat{\delta}_{si}(\gamma)$  for all nodes  $i \in N$  and all budget values  $\gamma$  can be computed by solving a dynamic programming recursion. Let  $f_s(i, k, \gamma)$  be the  $\gamma$ -delay of a path  $P_{si}$  from  $s$  to  $i$  traversing  $k$  arcs. The recursion is the following:

$$f_s(i, k, \gamma) = \begin{cases} \min_{(j,i) \in A} \{\max\{f_s(j, k-1, \gamma), f_s(j, k-1, \gamma-1) + \delta_{ji}\}\} & \text{if } 1 \leq \gamma \leq k-1 \\ \min_{(j,i) \in A} \{f_s(j, k-1, \gamma-1) + \delta_{ji}\} & \text{if } \gamma = k \\ \min_{(j,i) \in A} \{f_s(j, k-1, 0)\} & \text{if } \gamma = 0 \end{cases}$$

$$\forall k = 1, \dots, |N| - 1, \forall i \in N \setminus \{s\}, \forall \gamma = 0, \dots, \min\{\Gamma, k\}.$$

where we assume the initialization  $f_s(s, 0, 0) = 0$ ,  $f_s(s, 0, \gamma) = \infty$ ,  $\forall \gamma = 1, \dots, \Gamma$ , and  $f_s(i, 0, \gamma) = \infty$ ,  $\forall i \in N \setminus \{s\}$ ,  $\forall \gamma = 0, \dots, \Gamma$ . Then,  $\hat{\delta}_{sj}(\gamma)$  equals  $\min_{k=1, \dots, n} f_s(j, k, \gamma)$ .

In the next two steps, first precedences between nodes are determined. Then, arcs are eliminated based on those precedences and by using conditions derived from time windows and the minimum delay paths determined in the previous step.

*Precedence lists:*

1. Compute the shortest path costs  $s_{ij}$  between all pairs of nodes.
2. For each pair of nodes  $i$  and  $j$  add precedence  $i \prec j$  if either  $e_j + s_{ji} + \hat{\delta}_{ji} > l_i$  and the uncertainty set  $\mathcal{T}_K$  is considered, or  $e_j + s_{ji} + \hat{\delta}_{ji}(\Gamma) > l_i$  and the set  $\mathcal{T}_C$  is considered.
3. For each pair of nodes  $i$  and  $j$  such that  $i \prec k$  and  $k \prec j$  for some  $k \in N$  add the precedence  $i \prec j$ . This step is iteratively repeated until no new precedences are detected.

*Arc eliminations due to precedences:*

1. Remove from  $A$  all arcs  $(i, j)$  such that  $j \prec i$ , or  $i \prec k \prec j$  ( $k$  must be served between  $i$  and  $j$ ) for some  $k \in N$ .
2. If using uncertainty set  $\mathcal{T}_K$ , then remove from  $A$  all arcs  $(i, j)$  such that:
  - $k \prec i$  or  $k \prec j$  or  $e_i + t_{ij}^0 + s_{jk} + \min\{\Delta, \delta_{ij} + \hat{\delta}_{jk}\} > l_k$   
and
  - $i \prec k$  or  $j \prec k$  or  $e_k + s_{ki} + t_{ij}^0 + \min\{\Delta, \hat{\delta}_{ki} + \delta_{ij}\} > l_j$   
for some  $k \in N$ .
3. If using uncertainty set  $\mathcal{T}_C$ , then remove from  $A$  all arcs  $(i, j)$  such that:
  - $k \prec i$  or  $k \prec j$  or  $e_i + \hat{t}_{ij} + s_{jk} + \hat{\delta}_{jk}(\max\{\Gamma - 1, 0\}) > l_k$  or  $e_i + t_{ij}^0 + s_{jk} + \hat{\delta}_{jk}(\Gamma) > l_k$   
and
  - $i \prec k$  or  $j \prec k$  or  $e_k + s_{ki} + \hat{t}_{ij} + \hat{\delta}_{ki}(\max\{\Gamma - 1, 0\}) > l_j$  or  $e_k + s_{ki} + \hat{\delta}_{ki}(\Gamma) + t_{ij}^0 > l_j$   
for some  $k \in N$ .

## EC.5. Characteristics of the new instances

In this section, we give details on how the instances used in this paper were created. The next subsection explains the creation process of the new RTSPTW instances of sets GDE-D and GDE-I and provides some insight on their data. The following one describes how we generated the random instances used for the tradeoff analysis reported in Section 7.5.

### EC.5.1. Robust instances of sets GDE-D and GDE-I

As mentioned before, the two sets of GDE-D and GDE-I instances differ with respect to the delay distribution pattern, and particularly for how the maximum travel time  $\hat{t}_{ij}$  of each arc  $(i, j) \in A$  is generated.

Starting from each TSPTW instance of Gendreau et al. (1998) two travel time matrices  $[t_{ij}^0]$  and  $[\hat{t}_{ij}]$  are generated where  $t_{ij}^0$  represents the nominal travel time and  $\hat{t}_{ij}$  is the maximum or peak travel time of a corresponding RTSPTW instance of set GDE-D. The process is then repeated for the instances of set GDE-I.

In all cases nominal travel times  $t_{ij}^0$  are set equal to the travel times of the original TSPTW instance. The peak times  $\hat{t}_{ij}$  are instead generated differently for the two sets:

- GDE-D: The value of  $\hat{t}_{ij}$ ,  $\forall (i, j) \in A$ , is computed as  $\hat{t}_{ij} = \lfloor (\alpha + 1)t_{ij}^0 \rfloor$ , where  $\alpha$  is randomly drawn within the interval  $[0, 1]$ .

• GDE-I: The value of  $\hat{t}_{ij}$ ,  $\forall (i, j) \in A$ , is computed as  $\hat{t}_{ij} = \lfloor t_{ij}^0 + \delta \rfloor$ , where  $\delta$  is randomly drawn within the interval  $[0, 30]$ .

Each pair of travel time matrices  $[t_{ij}^0]$  and  $[\hat{t}_{ij}]$  generated in this way was then used to define three RTSPW( $\mathcal{T}_K$ ) instances and three RTSPW( $\mathcal{T}_C$ ) ones characterized by three different budget sizes as explained in Section EC.7. Note however that the three RTSPW( $\mathcal{T}_K$ ) instances derived in this way may actually end up having different peak travel times since these are further preprocessed by setting  $\hat{t}_{ij} := \min\{\hat{t}_{ij}, t_{ij}^0 + \Delta\}$ .

The following Table EC.1 summarizes the characteristics of the peak time matrices  $[\hat{t}_{ij}]$  generated as above. Each row of this table reports average data for one group of five instances with the same number of customers and average time windows widths. Columns “ $\alpha_{max}$ ”, “ $\alpha_{min}$ ” and “ $\alpha_{avg}$ ” report the maximum, minimum and average increase  $\alpha_{ij}$  of the travel time  $\hat{t}_{ij}$  with respect to the nominal time  $t_{ij}^0$  over all arcs (where  $\alpha_{ij} = \frac{\hat{t}_{ij}}{t_{ij}^0} - 1$ ). Columns “ $\delta_{max}$ ”, “ $\delta_{min}$ ” and “ $\delta_{avg}$ ” report instead the minimum, maximum, and average deviation  $\delta_{ij}$  of  $\hat{t}_{ij}$  with respect to the nominal time  $t_{ij}^0$  over all arcs (where  $\delta_{ij} = \hat{t}_{ij} - t_{ij}^0$ ).

**Table EC.1** Travel time data of instances GDE-D and GDE-I

|      |       | GDE-D          |                |                |                |                |                | GDE-I          |                |                |                |                |                |
|------|-------|----------------|----------------|----------------|----------------|----------------|----------------|----------------|----------------|----------------|----------------|----------------|----------------|
| $n$  | group | $\alpha_{max}$ | $\alpha_{min}$ | $\alpha_{avg}$ | $\delta_{max}$ | $\delta_{min}$ | $\delta_{avg}$ | $\alpha_{max}$ | $\alpha_{min}$ | $\alpha_{avg}$ | $\delta_{max}$ | $\delta_{min}$ | $\delta_{avg}$ |
| 20   | w120  | 1              | 0              | 0.50           | 46.60          | 0              | 12.07          | 13.23          | 0              | 0.94           | 30             | 0              | 14.67          |
|      | w140  | 1              | 0              | 0.52           | 49.40          | 0              | 13.05          | 12.04          | 0              | 0.90           | 30             | 0              | 14.51          |
|      | w160  | 1              | 0              | 0.50           | 43.00          | 0              | 12.57          | 14.13          | 0              | 0.93           | 30             | 0              | 14.90          |
|      | w180  | 1              | 0              | 0.51           | 47.00          | 0              | 12.86          | 17.90          | 0              | 0.96           | 30             | 0              | 14.85          |
|      | w200  | 1              | 0              | 0.52           | 47.80          | 0              | 12.72          | 13.93          | 0              | 0.95           | 30             | 0              | 15.39          |
| 40   | w120  | 1              | 0              | 0.50           | 53.40          | 0              | 13.22          | 26.40          | 0              | 0.92           | 30             | 0              | 14.83          |
|      | w140  | 1              | 0              | 0.51           | 50.40          | 0              | 12.88          | 21.00          | 0              | 0.90           | 30             | 0              | 14.69          |
|      | w160  | 1              | 0              | 0.51           | 47.80          | 0              | 12.38          | 20.20          | 0              | 0.94           | 30             | 0              | 14.88          |
|      | w180  | 1              | 0              | 0.50           | 51.00          | 0              | 13.14          | 18.20          | 0              | 0.88           | 30             | 0              | 14.98          |
|      | w200  | 1              | 0              | 0.50           | 48.80          | 0              | 12.55          | 17.20          | 0              | 0.92           | 30             | 0              | 15.05          |
| 60   | w120  | 1              | 0              | 0.50           | 54.00          | 0              | 13.16          | 24.40          | 0              | 0.89           | 30             | 0              | 15.02          |
|      | w140  | 1              | 0              | 0.50           | 53.00          | 0              | 12.84          | 22.80          | 0              | 0.87           | 30             | 0              | 14.81          |
|      | w160  | 1              | 0              | 0.50           | 57.00          | 0              | 13.18          | 23.80          | 0              | 0.88           | 30             | 0              | 15.05          |
|      | w180  | 1              | 0              | 0.49           | 54.00          | 0              | 12.64          | 28.40          | 0              | 0.90           | 30             | 0              | 14.94          |
|      | w200  | 1              | 0              | 0.50           | 52.80          | 0              | 12.74          | 25.80          | 0              | 0.90           | 30             | 0              | 15.01          |
| 80   | w100  | 1              | 0              | 0.50           | 53.80          | 0              | 12.53          | 27.00          | 0              | 0.91           | 30             | 0              | 14.87          |
|      | w120  | 1              | 0              | 0.50           | 55.40          | 0              | 12.79          | 28.60          | 0              | 0.89           | 30             | 0              | 15.03          |
|      | w140  | 1              | 0              | 0.50           | 53.80          | 0              | 12.68          | 26.80          | 0              | 0.89           | 30             | 0              | 14.88          |
|      | w160  | 1              | 0              | 0.50           | 53.20          | 0              | 12.98          | 27.00          | 0              | 0.89           | 30             | 0              | 14.88          |
|      | w180  | 1              | 0              | 0.50           | 54.80          | 0              | 12.71          | 29.00          | 0              | 0.93           | 30             | 0              | 14.89          |
| w200 | 1     | 0              | 0.50           | 53.80          | 0              | 12.53          | 27.00          | 0              | 0.91           | 30             | 0              | 14.87          |                |

### EC.5.2. Generation of random instances in simulation experiments

In our simulation experiments (see Section 7.5) random travel time vectors were generated following a given probability distribution which is either a discrete two-point distribution or a uniform distribution. Starting with a baseline TSPTW instance (either n60w120.001 or n60w200.001) we thus obtained a number of random TSPTW instances each defined by one of the travel time vectors generated. When sampling the travel time vectors we take the travel time  $\tilde{t}_{ij}$  of each arc  $(i, j) \in A$  in the baseline instance as the mean of the random travel time  $t_{ij}$ . In all cases, the arc costs  $c_{ij}$  are set equal to the mean travel times  $\tilde{t}_{ij}$ , while realizations of random travel times  $t_{ij}$  are generated as follows:

- Two-point distribution: Each travel time  $t_{ij}$ ,  $(i, j) \in A$  is treated as a two-point independently distributed random variable with  $\mathbb{P}(t_{ij} = \lfloor (1 - \lambda_{ij})\tilde{t}_{ij} \rfloor) = \mathbb{P}(t_{ij} = \lfloor (1 + \lambda_{ij})\tilde{t}_{ij} \rfloor) = 0.5$ . The value  $\lambda_{ij}$  is randomly and independently selected from the set  $\{0.1, 0.2, \dots, 0.8\}$  with equal probability.

- Uniform distribution: The travel time realization for each arc  $(i, j)$  is drawn uniformly from the interval  $[\lfloor \alpha_{low}\tilde{t}_{ij} \rfloor, \lfloor \alpha_{high}\tilde{t}_{ij} \rfloor]$ , where  $\alpha_{low}$ ,  $\alpha_{high}$  are set as 0.5 and 2 respectively. Each travel time vector generated in this way represents one sample. As explained in Section 7.5, a number of  $|\Omega|$  samples simulating available historical data are used to generate a RTSPTW instance, while an additional  $|\bar{\Omega}|$  samples are created to simulate future scenarios and evaluate the performance of the solutions obtained by solving the RTSPTW instance.

### EC.6. Comparison of the two uncertainty sets

This section provides an example showing that the two uncertainty sets  $\mathcal{T}_K$  and  $\mathcal{T}_C$  defined in Section 2 give rise, in general, to different sets of travel time scenarios also if the budget value  $\Gamma$  defining  $\mathcal{T}_C$  is permitted to be fractional. More precisely, given a budget value  $\Delta \in \mathbb{N}$  it is generally not possible to find a value  $0 \leq \Gamma \leq n$  such that the resulting polytopes  $\mathcal{T}_K$  and  $\mathcal{T}_C$  have the same extreme points, or equivalently such that  $\mathcal{T}_C = \mathcal{T}_K$ .

In view of the fact that  $\text{RTSPTW}(\mathcal{T}_K)$  and  $\text{RTSPTW}(\mathcal{T}_C)$  can be equivalently defined by replacing the sets  $\mathcal{T}_K$  and  $\mathcal{T}_C$  with the sets of their extreme points, this observation suggests that in general  $\text{RTSPTW}(\mathcal{T}_K)$  and  $\text{RTSPTW}(\mathcal{T}_C)$  model in effect different optimization problems also if  $\Gamma$  can be fractional. As a consequence,  $\text{RTSPTW}(\mathcal{T}_C)$  may not generally be used to obtain a solution of  $\text{RTSPTW}(\mathcal{T}_K)$ .

These observations are summarized and illustrated below by an example. We will use the notation  $\mathcal{T}_C(\bar{\Gamma})$  to indicate the set  $\mathcal{T}_C$  defined by setting  $\Gamma = \bar{\Gamma}$  for some given  $\bar{\Gamma}$ ,  $0 \leq \bar{\Gamma} \leq n$ . Similarly, we will write  $\mathcal{T}_K(\bar{\Delta})$  to indicate the set  $\mathcal{T}_K$  defined by setting  $\Delta = \bar{\Delta}$ , for some given  $\bar{\Delta} \in \mathbb{N}$ .

**Observation 5** *Consider a directed graph  $G = (V, A)$  with  $n$  nodes and a set of arcs  $(i, j) \in A$  each associated with an integer nominal travel time  $t_{ij}^0$  and an integer maximum delay  $\delta_{ij}$ . In general, for a fixed  $\bar{\Delta} \in \mathbb{N}$  there is no value  $0 \leq \bar{\Gamma} \leq n$  such that  $\mathcal{T}_K(\bar{\Delta}) = \mathcal{T}_C(\bar{\Gamma})$ . Furthermore, there is in general no value  $0 \leq \bar{\Gamma} \leq n$  such that  $RTSPTW(\mathcal{T}_C(\bar{\Gamma}))$  admits an optimal solution which is also optimal for  $RTSPTW(\mathcal{T}_K(\bar{\Delta}))$ .*

It is enough to provide an example. Let  $\mathcal{T}_K(\bar{\Delta})$  be defined by  $\bar{\Delta} = 3$  and let  $A = \{(1, 2), (1, 3), (2, 1), (2, 3), (4, 2), (3, 4), (4, 1)\}$ ,  $\delta_{12} = \delta_{23} = 2$ , and  $\delta_{ij} = 1$  for other arcs. We assume for simplicity that node 1 must be both the start and end node of the tour.

Suppose now that the only node with a time window is node 1 with  $e_1 = 0$  and  $l_1 = 15$  and that the nominal travel times are  $t_{12}^0 = t_{34}^0 = 2$ ,  $t_{23}^0 = t_{21}^0 = 3$ , and  $t_{13}^0 = t_{41}^0 = t_{42}^0 = 4$ . There are only two Hamiltonian tours in  $G$ , that is,  $P_1 = (1, 2, 3, 4, 1)$  and  $P_2 = (1, 3, 4, 2, 1)$ . These two tours are depicted in Figure EC.1, where below each arc of the tours it is shown its nominal travel time, and above its maximum delay. Suppose that  $P_2$  has lower cost than  $P_1$ . Notice that if  $\Delta = 3$  then  $P_1$  is feasible for  $RTSPTW(\mathcal{T}_K)$ , but  $P_2$  is not (the arrival time at the last node is 16). Therefore  $P_1$  is optimal for this problem. Now consider  $RTSPTW(\mathcal{T}_C)$  and note that if  $\Gamma > 2$  then both  $P_1$  and  $P_2$  are infeasible for this problem because assigning full delay to the two arcs in bold yields an arrival time of 15 at the last node. On the other hand, if  $\Gamma \leq 2$  then the tour  $P_2$  is feasible, and thus optimal, for  $RTSPTW(\mathcal{T}_C)$ . Therefore, for any (possibly fractional) value of  $\Gamma$  either  $RTSPTW(\mathcal{T}_C)$  is infeasible or its optimal solution is infeasible for  $RTSPTW(\mathcal{T}_K(3))$ . Obviously, this also means that  $\mathcal{T}_K(3) \neq \mathcal{T}_C(\Gamma)$  for all values of  $\Gamma$ .

## EC.7. Detailed computational results

In this section, we report detailed results obtained by our algorithm on the new RTSPTW instances of sets GDE-I and GDE-D and on all TSPTW instances proposed by Gendreau et al. (1998) and Ohlmann and Thomas (2007). Each one of Tables EC.2–EC.18 shows the results obtained by solving  $RTSPTW(\mathcal{T}_K)$  or  $RTSPTW(\mathcal{T}_C)$  for instances of the same size. Tables EC.19–EC.21 report the results for the TSPTW instances.

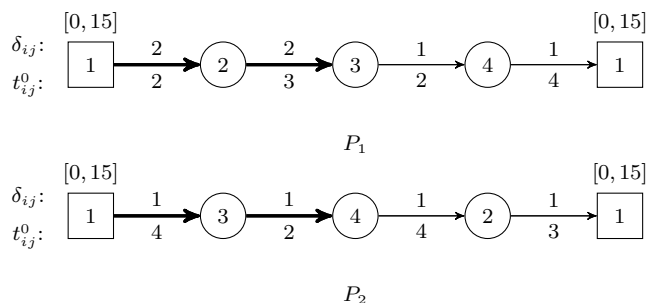

**Figure EC.1** Illustration of Observation 5

The first column of each table identifies the instance. In Tables EC.2–EC.18, the remaining columns are divided into three blocks each reporting the results obtained for one of the three budget sizes. These columns report the following information. Column “ $ub^*$ ” reports the best known upper bound. Column “ $\%gap$ ” reports the percentage distance of the best upper bound  $ub$  found by the GVNS from the best known upper bound  $ub^*$  (computed as  $100 \cdot \frac{ub - ub^*}{ub - ub^*}$ ). Column “ $\%lb$ ” reports the percentage of the lower bound  $lb$  computed by the exact algorithm with respect to  $ub^*$  (computed as  $100 \cdot \frac{lb}{ub^*}$ ). Column “ $opt$ ” indicates whether the instance was solved to optimality (i.e., either an optimal solution was found or the instance was proved infeasible). A check-mark indicates optimality.

Under heading GVNS, column “ $time$ ” reports the total time spent by the GVNS. The same column reports the time spent by the lower bounding procedure, under heading CSP, and by the entire algorithm, under heading DP. Note that all these times include the time spent by the algorithm since the beginning until when they are measured.

Tables EC.19–EC.21 report the same columns as described above except that the time spent by the lower bounding procedure is not reported.

For instances that were proved infeasible we report the symbol “inf” in column “ $ub^*$ ” whereas we report the symbol “?” to indicate that no feasible solution was found but the instance was not proved infeasible. Finally, in column “ $time$ ” (under heading CSP or DP) we report the symbol “t.1.” to indicate that the algorithm stopped prematurely upon reaching the imposed time limit, whereas we report the symbol “m.1.” if the algorithm stopped due to the memory limit imposed to the DP algorithm.

Some instances were proved infeasible during preprocessing (i.e., either the precedence graph induced by the precedence lists contains a directed cycle, or the assignment problem solved in Phase 1 is infeasible). Additionally, if an instance is proved infeasible for a certain value of the budget, then it is not solved with higher values. For all these instances no

values are reported in columns “%gap”, “%lb” or “time”. Note that in some cases the GVNS is unable to find a feasible solution, but an optimal solution was nevertheless found by the exact algorithm. In these cases no values are reported in column “%gap”.

Finally, we note that for instances where Step 2 of Phase 1 reaches the time limit without finding any feasible dual solution the lower bound  $lb$  obtained at termination corresponds to the best (generally very weak) Lagrangean bound obtained at Step 1.

**Table EC.2 RTSPTW( $T_K$ ): Results on the instances of set GDE-D with 80 customers.**

| Instance | $\Delta = 20$ |           |        |                   |                       | $\Delta = 40$ |           |             |                   |                       | $\Delta = 60$ |             |        |                   |                       |
|----------|---------------|-----------|--------|-------------------|-----------------------|---------------|-----------|-------------|-------------------|-----------------------|---------------|-------------|--------|-------------------|-----------------------|
|          | GVNS          |           | CSP    |                   | DP                    | GVNS          |           | CSP         |                   | DP                    | GVNS          |             | CSP    |                   | DP                    |
|          | ub*           | %gap time | %lb    | time <sup>†</sup> | opt time <sup>†</sup> | ub*           | %gap time | %lb         | time <sup>†</sup> | opt time <sup>†</sup> | ub*           | %gap time   | %lb    | time <sup>†</sup> | opt time <sup>†</sup> |
| w100.001 | ?             | - 1378    | -      | 2593              | 2593                  | inf           | - 1399    | - 2592      | ✓ 2592            | inf                   | - 1367        | - 2528      | ✓ 2528 |                   |                       |
| w100.002 | 590           | 0.34 748  | 99.49  | 804               | ✓ 805                 | inf           | - 1400    | - 6044      | ✓ 6044            | inf                   | - -           | - -         | ✓ -    |                   |                       |
| w100.003 | 588           | 0.00 576  | 100.00 | 602               | ✓ 602                 | inf           | - 1353    | - 1924      | ✓ 1924            | inf                   | - 1354        | - 2374      | ✓ 2374 |                   |                       |
| w100.004 | inf           | - 212     | -      | 337               | ✓ 337                 | inf           | - -       | - -         | ✓ -               | inf                   | - -           | - -         | ✓ -    |                   |                       |
| w100.005 | 554           | 0.00 448  | 100.00 | 546               | ✓ 546                 | ?             | - 1385    | - t.l.      | -                 | ?                     | - 1409        | - t.l.      | t.l.   |                   |                       |
| w120.001 | 517           | 0.00 765  | 99.78  | 917               | ✓ 918                 | 519           | 0.00 665  | 100.00 986  | ✓ 986             | 519                   | 0.00 646      | 100.00 1044 | ✓ 1044 |                   |                       |
| w120.002 | 577           | 0.00 279  | 99.98  | 323               | ✓ 323                 | 577           | 0.00 378  | 99.98 493   | ✓ 493             | 578                   | 0.00 541      | 100.00 737  | ✓ 737  |                   |                       |
| w120.003 | 544           | 0.00 592  | 100.00 | 648               | ✓ 648                 | 579           | 0.00 989  | 100.00 1197 | ✓ 1197            | 581                   | 0.00 584      | 100.00 1267 | ✓ 1267 |                   |                       |
| w120.004 | 508           | 0.00 519  | 98.82  | 611               | ✓ 614                 | 517           | 0.00 733  | 99.03 1011  | ✓ 1019            | 518                   | 0.00 783      | 99.28 1187  | ✓ 1656 |                   |                       |
| w120.005 | 622           | 0.00 371  | 98.47  | 653               | ✓ 672                 | 622           | 0.00 518  | 99.19 976   | ✓ 1032            | 627                   | 0.00 838      | 99.62 3141  | ✓ 3923 |                   |                       |
| w140.001 | 515           | 0.00 701  | 100.00 | 862               | ✓ 862                 | 515           | 0.00 768  | 100.00 1037 | ✓ 1037            | 515                   | 0.00 560      | 100.00 1293 | ✓ 1293 |                   |                       |
| w140.002 | 518           | 0.00 575  | 99.42  | 3147              | ✓ 3152                | 529           | 0.19 701  | 98.80 6435  | ✓ 6686            | 531                   | 0.00 948      | 79.87 t.l.  | -      |                   |                       |
| w140.003 | 603           | 0.00 433  | 99.04  | 678               | ✓ 681                 | 603           | 1.16 434  | 99.12 1336  | ✓ 1426            | 608                   | 0.49 577      | 98.61 2600  | ✓ 3881 |                   |                       |
| w140.004 | 440           | 0.00 342  | 98.95  | 933               | ✓ 971                 | 450           | 2.22 776  | 99.42 2059  | ✓ 4143            | 474                   | 0.00 883      | 98.83 4555  | t.l.   |                   |                       |
| w140.005 | 545           | 0.00 323  | 100.00 | 361               | ✓ 361                 | 545           | 0.00 488  | 100.00 581  | ✓ 581             | 562                   | 0.00 369      | 100.00 636  | ✓ 636  |                   |                       |
| w160.001 | 509           | 0.00 839  | 100.00 | 1094              | ✓ 1094                | 516           | 0.00 1007 | 100.00 1972 | ✓ 1972            | 516                   | 0.19 1009     | 100.00 2869 | ✓ 2869 |                   |                       |
| w160.002 | 565           | 0.71 740  | 98.32  | 2573              | ✓ 3672                | 583           | 0.00 848  | 97.13 5622  | t.l.              | 583                   | 0.00 1112     | 55.96 t.l.  | -      |                   |                       |
| w160.003 | 531           | 0.00 410  | 99.15  | 1518              | ✓ 1536                | 533           | 0.00 549  | 99.78 1898  | ✓ 2008            | 533                   | 0.00 712      | 99.98 2303  | ✓ 2303 |                   |                       |
| w160.004 | 514           | 0.00 667  | 100.00 | 946               | ✓ 946                 | 517           | 0.00 679  | 100.00 1311 | ✓ 1311            | 517                   | 0.00 801      | 100.00 2168 | ✓ 2168 |                   |                       |
| w160.005 | 454           | 0.00 521  | 99.97  | 822               | ✓ 822                 | 454           | 2.20 499  | 100.00 1731 | ✓ 1731            | 464                   | 0.00 731      | 99.08 2628  | ✓ 3632 |                   |                       |
| w180.001 | 565           | 1.06 758  | 99.32  | 1321              | ✓ 1341                | 573           | 0.00 829  | 99.95 1527  | ✓ 1527            | 574                   | 0.00 1124     | 99.84 2164  | ✓ 2164 |                   |                       |
| w180.002 | 510           | 0.00 626  | 99.62  | 1256              | ✓ 1258                | 515           | 0.00 821  | 99.71 2266  | ✓ 2277            | 515                   | 0.00 912      | 100.00 2065 | ✓ 2065 |                   |                       |
| w180.003 | 537           | 0.00 550  | 99.44  | 2081              | ✓ 2086                | 539           | 0.00 873  | 99.84 2605  | ✓ 2605            | 539                   | 0.00 1058     | 99.66 2742  | ✓ 2824 |                   |                       |
| w180.004 | 483           | 0.00 1351 | 99.76  | 1609              | ✓ 1610                | 483           | 0.00 1633 | 99.84 2175  | ✓ 2175            | 491                   | 0.00 1720     | 99.92 2720  | ✓ 2720 |                   |                       |
| w180.005 | 473           | 0.00 434  | 99.79  | 664               | ✓ 667                 | 475           | 0.00 615  | 100.00 1053 | ✓ 1053            | 475                   | 0.00 696      | 100.00 1144 | ✓ 1144 |                   |                       |
| w200.001 | 497           | 0.20 644  | 99.50  | 1936              | ✓ 1963                | 499           | 0.00 1059 | 99.60 2964  | ✓ 2997            | 499                   | 0.00 1123     | 99.72 2640  | ✓ 2692 |                   |                       |
| w200.002 | 508           | 0.00 1047 | 99.93  | 1246              | ✓ 1246                | 508           | 0.00 1125 | 100.00 1494 | ✓ 1494            | 508                   | 0.00 855      | 100.00 1162 | ✓ 1162 |                   |                       |
| w200.003 | 464           | 0.00 758  | 99.71  | 1061              | ✓ 1062                | 465           | 0.43 913  | 99.94 1418  | ✓ 1423            | 467                   | 0.64 1054     | 100.00 2446 | ✓ 2532 |                   |                       |
| w200.004 | 526           | 0.00 488  | 99.14  | 955               | ✓ 957                 | 535           | 0.00 789  | 99.81 1313  | ✓ 1319            | 537                   | 0.00 1033     | 100.00 2258 | ✓ 2258 |                   |                       |
| w200.005 | 439           | 0.00 493  | 100.00 | 1061              | ✓ 1061                | 445           | 0.67 505  | 99.89 1609  | ✓ 1622            | 449                   | 0.89 675      | 100.00 4787 | ✓ 4787 |                   |                       |

†: Includes the time of GVNS.

**Table EC.3** RTSPW( $\mathcal{T}_K$ ): Results on the instances of set GDE-I with 80 customers.

| Instance | $\Delta = 20$ |      |      |        |                   |      | $\Delta = 40$     |     |                   |      |                   |      | $\Delta = 60$     |      |                   |      |      |        |      |   |      |
|----------|---------------|------|------|--------|-------------------|------|-------------------|-----|-------------------|------|-------------------|------|-------------------|------|-------------------|------|------|--------|------|---|------|
|          | GVNS          |      | CSP  |        | DP                | GVNS |                   | CSP |                   | DP   | GVNS              |      | CSP               |      | DP                |      |      |        |      |   |      |
|          | $ub^*$        | %gap | time | %lb    | time <sup>†</sup> | opt  | time <sup>†</sup> | opt | time <sup>†</sup> | opt  | time <sup>†</sup> | opt  | time <sup>†</sup> | opt  | time <sup>†</sup> |      |      |        |      |   |      |
| w100.001 | inf           | -    | 1434 | -      | 1556              | ✓    | 1556              | inf | 0.00              | -    | -                 | 1425 | ✓                 | 1425 | inf               | -    | 1310 | -      | 1390 | ✓ | 1390 |
| w100.002 | inf           | -    | 1361 | -      | 1521              | ✓    | 1521              | inf | 0.00              | -    | -                 | 1456 | ✓                 | 1456 | inf               | -    | 1343 | -      | 1420 | ✓ | 1420 |
| w100.003 | inf           | -    | 0    | -      | 0                 | ✓    | 0                 | inf | 0.00              | -    | -                 | 0    | ✓                 | 0    | inf               | -    | 0    | -      | 0    | ✓ | 0    |
| w100.004 | inf           | -    | 0    | -      | 0                 | ✓    | 0                 | inf | 0.00              | -    | -                 | 0    | ✓                 | 0    | inf               | -    | 0    | -      | 0    | ✓ | 0    |
| w100.005 | inf           | -    | 0    | -      | 0                 | ✓    | 0                 | inf | 0.00              | -    | -                 | 0    | ✓                 | 0    | inf               | -    | 0    | -      | 0    | ✓ | 0    |
| w120.001 | 517           | 0.00 | 846  | 100.00 | 952               | ✓    | 952               | 519 | 0.00              | 1314 | 100.00            | 1409 | ✓                 | 1409 | 531               | 0.00 | 527  | 100.00 | 721  | ✓ | 721  |
| w120.002 | 578           | 0.00 | 362  | 99.90  | 399               | ✓    | 399               | 578 | 0.00              | 521  | 100.00            | 563  | ✓                 | 563  | 581               | 0.00 | 529  | 100.00 | 571  | ✓ | 571  |
| w120.003 | 544           | 0.00 | 881  | 100.00 | 943               | ✓    | 943               | 593 | 0.00              | 1934 | 100.00            | 2058 | ✓                 | 2058 | inf               | 0.00 | 1364 | 0.25   | 1594 | ✓ | 1594 |
| w120.004 | 509           | 0.00 | 418  | 99.21  | 494               | ✓    | 494               | 518 | 0.00              | 782  | 99.42             | 874  | ✓                 | 876  | inf               | 0.00 | 1376 | 0.25   | 1469 | ✓ | 1469 |
| w120.005 | 622           | 0.00 | 363  | 98.69  | 566               | ✓    | 568               | 650 | 0.00              | 678  | 98.91             | 1106 | ✓                 | 1113 | 673               | 0.00 | 1161 | 99.26  | 1435 | ✓ | 1448 |
| w140.001 | 512           | 0.00 | 1444 | 100.00 | 1566              | ✓    | 1566              | 512 | 0.00              | 1191 | 100.00            | 1359 | ✓                 | 1359 | 518               | 0.00 | 886  | 100.00 | 1109 | ✓ | 1109 |
| w140.002 | 520           | 0.00 | 406  | 99.76  | 2522              | ✓    | 2526              | 533 | 0.00              | 763  | 99.66             | 1839 | ✓                 | 1841 | 557               | 0.18 | 876  | 99.41  | 1874 | ✓ | 1882 |
| w140.003 | 603           | 0.00 | 403  | 99.37  | 564               | ✓    | 565               | 611 | 0.00              | 461  | 99.51             | 656  | ✓                 | 658  | 623               | 0.00 | 749  | 100.00 | 956  | ✓ | 956  |
| w140.004 | 444           | 0.00 | 343  | 99.57  | 559               | ✓    | 561               | 481 | 0.21              | 921  | 97.20             | 1379 | ✓                 | 1490 | 504               | 0.00 | 1165 | 98.62  | 1542 | ✓ | 1649 |
| w140.005 | 545           | 0.00 | 321  | 100.00 | 379               | ✓    | 379               | 547 | 0.00              | 417  | 100.00            | 498  | ✓                 | 498  | 553               | 0.00 | 585  | 100.00 | 674  | ✓ | 674  |
| w160.001 | 509           | 0.00 | 645  | 100.00 | 1061              | ✓    | 1061              | 523 | 0.00              | 1058 | 100.00            | 1966 | ✓                 | 1966 | 533               | 0.00 | 1139 | 100.00 | 2113 | ✓ | 2113 |
| w160.002 | 565           | 0.88 | 758  | 98.42  | 2183              | ✓    | 2350              | 585 | 0.00              | 697  | 98.72             | 2607 | ✓                 | 2937 | 594               | 0.00 | 1065 | 99.99  | 2219 | ✓ | 2219 |
| w160.003 | 533           | 0.00 | 406  | 98.97  | 1055              | ✓    | 1061              | 545 | 0.00              | 1135 | 100.00            | 1467 | ✓                 | 1467 | 572               | 0.00 | 787  | 100.00 | 1304 | ✓ | 1304 |
| w160.004 | 517           | 0.00 | 691  | 100.00 | 987               | ✓    | 987               | 527 | 0.00              | 1068 | 99.81             | 1285 | ✓                 | 1292 | 543               | 0.00 | 1054 | 100.00 | 1443 | ✓ | 1443 |
| w160.005 | 465           | 0.00 | 535  | 99.14  | 852               | ✓    | 856               | 466 | 0.00              | 610  | 100.00            | 812  | ✓                 | 812  | 482               | 0.00 | 715  | 100.00 | 941  | ✓ | 941  |
| w180.001 | 565           | 0.18 | 611  | 99.43  | 845               | ✓    | 847               | 573 | 0.00              | 891  | 99.97             | 1082 | ✓                 | 1082 | 585               | 0.85 | 1200 | 100.00 | 1396 | ✓ | 1396 |
| w180.002 | 510           | 0.00 | 630  | 99.90  | 1155              | ✓    | 1155              | 536 | 0.00              | 797  | 98.13             | 2600 | ✓                 | 2710 | 539               | 0.00 | 819  | 99.32  | 1310 | ✓ | 1320 |
| w180.003 | 539           | 0.00 | 615  | 99.76  | 1512              | ✓    | 1514              | 539 | 0.00              | 759  | 100.00            | 1181 | ✓                 | 1181 | 541               | 0.00 | 1240 | 100.00 | 1664 | ✓ | 1664 |
| w180.004 | 482           | 0.00 | 631  | 99.78  | 843               | ✓    | 844               | 483 | 0.00              | 1204 | 100.00            | 1459 | ✓                 | 1459 | 489               | 0.20 | 1037 | 100.00 | 1356 | ✓ | 1368 |
| w180.005 | 473           | 0.00 | 440  | 100.00 | 540               | ✓    | 540               | 490 | 1.02              | 727  | 100.00            | 1006 | ✓                 | 1006 | 533               | 0.00 | 1296 | 99.98  | 2022 | ✓ | 2022 |
| w200.001 | 497           | 0.20 | 661  | 99.58  | 1806              | ✓    | 1814              | 505 | 0.00              | 1001 | 99.61             | 1899 | ✓                 | 1917 | 507               | 0.00 | 1132 | 99.97  | 1522 | ✓ | 1522 |
| w200.002 | 508           | 0.00 | 1134 | 99.93  | 1282              | ✓    | 1282              | 512 | 0.00              | 1168 | 99.86             | 1311 | ✓                 | 1311 | 513               | 0.00 | 963  | 99.98  | 1112 | ✓ | 1112 |
| w200.003 | 465           | 0.00 | 789  | 99.97  | 968               | ✓    | 968               | 472 | 0.00              | 985  | 100.00            | 1207 | ✓                 | 1207 | 503               | 0.00 | 1272 | 98.84  | 2080 | ✓ | 2121 |
| w200.004 | 526           | 0.00 | 510  | 99.14  | 1008              | ✓    | 1009              | 535 | 0.00              | 689  | 99.81             | 1128 | ✓                 | 1129 | 557               | 0.00 | 945  | 98.81  | 1796 | ✓ | 1812 |
| w200.005 | 444           | 0.00 | 496  | 99.65  | 1105              | ✓    | 1106              | 465 | 0.43              | 744  | 98.70             | 1994 | ✓                 | 2391 | 472               | 0.00 | 1172 | 99.36  | 2521 | ✓ | 2576 |

†: Includes the time of GVNS.

**Table EC.4** RTSPW( $\mathcal{T}_K$ ): Results on the instances of set GDE-D with 80 customers and larger values of  $\Delta$ .

| Instance | $\Delta = 80$ |      |      |        |                   |      | $\Delta = 100$    |     |                   |      |                   |      |   |      |
|----------|---------------|------|------|--------|-------------------|------|-------------------|-----|-------------------|------|-------------------|------|---|------|
|          | GVNS          |      | CSP  |        | DP                | GVNS |                   | CSP |                   | DP   |                   |      |   |      |
|          | $ub^*$        | %gap | time | %lb    | time <sup>†</sup> | opt  | time <sup>†</sup> | opt | time <sup>†</sup> | opt  | time <sup>†</sup> |      |   |      |
| w100.001 | inf           | -    | 1228 | -      | 3445              | ✓    | 3445              | inf | -                 | 1220 | -                 | 2599 | ✓ | 2599 |
| w100.002 | inf           | -    | 1272 | -      | 4636              | ✓    | 4636              | inf | -                 | 1256 | -                 | 3924 | ✓ | 3924 |
| w100.003 | inf           | -    | 1236 | -      | 2114              | ✓    | 2114              | inf | -                 | 1239 | -                 | 6321 | ✓ | 6321 |
| w100.004 | inf           | -    | 0    | -      | 0                 | ✓    | 0                 | inf | -                 | 0    | -                 | 0    | ✓ | 0    |
| w100.005 | ?             | -    | 1305 | -      | t.l.              | -    | -                 | ?   | -                 | 1269 | -                 | t.l. | - | -    |
| w120.001 | 522           | 0.00 | 646  | 100.00 | 1330              | ✓    | 1330              | 522 | 0.00              | 864  | 100.00            | 1484 | ✓ | 1484 |
| w120.002 | 586           | 0.00 | 564  | 100.00 | 1144              | ✓    | 1144              | ?   | -                 | 1291 | -                 | t.l. | - | -    |
| w120.003 | 582           | 0.00 | 579  | 100.00 | 1184              | ✓    | 1184              | 582 | 0.00              | 685  | 100.00            | 1513 | ✓ | 1513 |
| w120.004 | 521           | 0.00 | 923  | 99.96  | 2344              | ✓    | 2344              | 521 | 0.00              | 1111 | 100.00            | 2528 | ✓ | 2528 |
| w120.005 | 649           | 0.00 | 1091 | 90.28  | t.l.              | -    | -                 | ?   | -                 | 1272 | -                 | t.l. | - | -    |
| w140.001 | 516           | 0.00 | 546  | 100.00 | 1320              | ✓    | 1320              | 516 | 0.00              | 537  | 100.00            | 1843 | ✓ | 1843 |
| w140.002 | 534           | 0.00 | 1126 | 75.71  | t.l.              | -    | -                 | 536 | 0.00              | 1144 | 79.40             | t.l. | - | -    |
| w140.003 | 618           | 0.00 | 898  | -      | t.l.              | -    | -                 | 621 | 0.00              | 1228 | -                 | t.l. | - | -    |
| w140.004 | ?             | -    | 1328 | -      | t.l.              | -    | -                 | ?   | -                 | 1526 | -                 | t.l. | - | -    |
| w140.005 | 562           | 0.00 | 465  | 100.00 | 910               | ✓    | 910               | 562 | 0.00              | 543  | 100.00            | 1012 | ✓ | 1012 |
| w160.001 | 537           | 0.00 | 1176 | 80.16  | t.l.              | -    | -                 | 549 | 0.00              | 1231 | 78.41             | t.l. | - | -    |
| w160.002 | 586           | 0.00 | 1085 | 55.67  | t.l.              | -    | -                 | 599 | 0.00              | 1249 | 54.46             | t.l. | - | -    |
| w160.003 | 533           | 0.00 | 782  | 99.97  | 2470              | ✓    | 2470              | 533 | 0.00              | 924  | 100.00            | 3858 | ✓ | 3858 |
| w160.004 | 517           | 0.58 | 1029 | 100.00 | 1621              | ✓    | 1621              | 517 | 0.58              | 1239 | 100.00            | 1989 | ✓ | 1989 |
| w160.005 | 464           | 0.00 | 837  | 99.62  | 2544              | ✓    | 4323              | 475 | 0.00              | 1046 | 97.51             | 9073 | - | t.l. |
| w180.001 | 579           | 0.35 | 1234 | 100.00 | 2716              | ✓    | 2716              | 593 | 2.36              | 1281 | 100.00            | 7645 | ✓ | 7645 |
| w180.002 | 521           | 0.00 | 981  | 99.25  | 4439              | -    | t.l.              | 521 | 0.00              | 1124 | 84.40             | t.l. | - | -    |
| w180.003 | 546           | 0.00 | 1202 | 99.92  | 6215              | ✓    | 6215              | 559 | 0.00              | 1218 | -                 | t.l. | - | -    |
| w180.004 | 491           | 0.00 | 1646 | 99.92  | 2458              | ✓    | 2458              | 491 | 0.00              | 1547 | 99.91             | 3381 | ✓ | 3381 |
| w180.005 | 475           | 0.00 | 884  | 100.00 | 1528              | ✓    | 1528              | 476 | 0.00              | 1007 | 100.00            | 1614 | ✓ | 1614 |
| w200.001 | 508           | 0.00 | 1293 | 77.52  | t.l.              | -    | -                 | 509 | 0.00              | 1320 | 84.05             | t.l. | - | -    |
| w200.002 | 510           | 0.39 | 796  | 100.00 | 1931              | ✓    | 1940              | 516 | 0.19              | 846  | 99.32             | 2359 | ✓ | 4640 |
| w200.003 | 467           | 0.43 | 1119 | 100.00 | 8616              | ✓    | 9106              | 467 | 0.64              | 1210 | 100.00            | 7167 | ✓ | 9044 |
| w200.004 | 537           | 0.00 | 1165 | 99.99  | 2462              | ✓    | 2462              | 537 | 0.00              | 1193 | 99.99             | 2587 | ✓ | 2587 |
| w200.005 | 449           | 0.89 | 638  | 100.00 | 7495              | ✓    | 7495              | 449 | 0.89              | 796  | 100.00            | 5694 | ✓ | 5694 |

†: Includes the time of GVNS. In this table, an entry t.l. in column *time* of section DP indicates that CG timed out when precomputing the path set  $\mathcal{Q}$  before running the DP algorithm.

**Table EC.5 RTSPTW( $\mathcal{T}_K$ ): Results on the instances of set GDE-D with 60 customers.**

| Instance | $\Delta = 20$ |      |      |        |                 |                     | $\Delta = 40$ |      |      |        |                 |                     | $\Delta = 60$ |      |      |        |                 |                     |
|----------|---------------|------|------|--------|-----------------|---------------------|---------------|------|------|--------|-----------------|---------------------|---------------|------|------|--------|-----------------|---------------------|
|          | GVNS          |      | CSP  |        | DP              |                     | GVNS          |      | CSP  |        | DP              |                     | GVNS          |      | CSP  |        | DP              |                     |
|          | $ub^*$        | %gap | time | %lb    | time $^\dagger$ | opt time $^\dagger$ | $ub^*$        | %gap | time | %lb    | time $^\dagger$ | opt time $^\dagger$ | $ub^*$        | %gap | time | %lb    | time $^\dagger$ | opt time $^\dagger$ |
| w120.001 | 398           | 0.00 | 196  | 100.00 | 246             | ✓ 246               | 401           | 0.00 | 270  | 100.00 | 315             | ✓ 315               | 401           | 0.00 | 262  | 100.00 | 375             | ✓ 375               |
| w120.002 | 511           | 0.00 | 55   | 99.12  | 130             | ✓ 130               | 512           | 0.00 | 212  | 100.00 | 298             | ✓ 298               | 518           | 0.00 | 336  | 100.00 | 817             | ✓ 817               |
| w120.003 | 407           | 0.00 | 169  | 100.00 | 206             | ✓ 206               | 409           | 0.00 | 395  | 100.00 | 485             | ✓ 485               | 412           | 0.00 | 427  | 100.00 | 554             | ✓ 554               |
| w120.004 | 490           | 0.00 | 62   | 99.96  | 117             | ✓ 117               | 492           | 0.00 | 68   | 100.00 | 150             | ✓ 150               | 492           | 0.00 | 88   | 100.00 | 230             | ✓ 230               |
| w120.005 | 565           | 0.00 | 120  | 100.00 | 166             | ✓ 166               | 566           | 0.00 | 124  | 100.00 | 175             | ✓ 175               | 568           | 0.00 | 143  | 100.00 | 209             | ✓ 209               |
| w140.001 | 423           | 0.00 | 97   | 100.00 | 129             | ✓ 129               | 427           | 0.00 | 137  | 100.00 | 209             | ✓ 209               | 435           | 0.00 | 184  | 98.97  | 400             | ✓ 474               |
| w140.002 | 478           | 0.00 | 153  | 100.00 | 189             | ✓ 189               | 478           | 0.00 | 116  | 100.00 | 206             | ✓ 206               | inf           | -    | 1000 | -      | 3031            | ✓ 3031              |
| w140.003 | 439           | 0.00 | 63   | 100.00 | 90              | ✓ 90                | 440           | 0.00 | 69   | 100.00 | 119             | ✓ 119               | 441           | 0.00 | 77   | 99.89  | 120             | ✓ 120               |
| w140.004 | inf           | -    | 995  | -      | 1213            | ✓ 1213              | inf           | -    | 982  | -      | 1099            | ✓ 1099              | inf           | -    | 988  | -      | 1137            | ✓ 1137              |
| w140.005 | 468           | 0.00 | 80   | 99.55  | 195             | ✓ 199               | 478           | 0.63 | 123  | 99.16  | 296             | ✓ 303               | 483           | 1.24 | 572  | 100.00 | 731             | ✓ 731               |
| w160.001 | 563           | 0.00 | 186  | 100.00 | 268             | ✓ 268               | 563           | 0.00 | 82   | 100.00 | 302             | ✓ 302               | 563           | 0.00 | 108  | 100.00 | 402             | ✓ 402               |
| w160.002 | 442           | 0.00 | 307  | 100.00 | 343             | ✓ 343               | 448           | 0.00 | 358  | 100.00 | 426             | ✓ 426               | 448           | 0.00 | 252  | 100.00 | 376             | ✓ 376               |
| w160.003 | 434           | 0.00 | 84   | 99.56  | 198             | ✓ 198               | 434           | 0.00 | 91   | 99.71  | 296             | ✓ 297               | 435           | 0.00 | 123  | 99.85  | 452             | ✓ 452               |
| w160.004 | 462           | 0.00 | 66   | 100.00 | 145             | ✓ 145               | 462           | 0.00 | 74   | 100.00 | 169             | ✓ 169               | 462           | 0.00 | 81   | 100.00 | 346             | ✓ 346               |
| w160.005 | 501           | 0.00 | 80   | 100.00 | 122             | ✓ 122               | 501           | 0.00 | 99   | 100.00 | 403             | ✓ 403               | 501           | 0.00 | 115  | 100.00 | 427             | ✓ 427               |
| w180.001 | 420           | 0.00 | 124  | 97.92  | 858             | ✓ 883               | 426           | 0.00 | 130  | 98.38  | 1164            | ✓ 1339              | 431           | 0.00 | 129  | 97.46  | 2033            | ✓ 2991              |
| w180.002 | 412           | 0.00 | 139  | 99.61  | 189             | ✓ 189               | 412           | 0.00 | 143  | 99.92  | 205             | ✓ 205               | 414           | 0.00 | 140  | 99.92  | 256             | ✓ 256               |
| w180.003 | 446           | 0.00 | 76   | 99.40  | 134             | ✓ 134               | 451           | 0.00 | 125  | 99.88  | 210             | ✓ 210               | 451           | 0.00 | 142  | 99.88  | 251             | ✓ 251               |
| w180.004 | 463           | 0.00 | 86   | 100.00 | 138             | ✓ 138               | 463           | 0.00 | 93   | 100.00 | 161             | ✓ 161               | 463           | 0.00 | 104  | 100.00 | 215             | ✓ 215               |
| w180.005 | 395           | 0.00 | 91   | 100.00 | 162             | ✓ 162               | 410           | 0.49 | 130  | 97.94  | 614             | ✓ 932               | 413           | 0.00 | 494  | 98.23  | 2483            | t.l.                |
| w200.001 | 422           | 0.00 | 146  | 100.00 | 215             | ✓ 215               | 423           | 0.00 | 203  | 100.00 | 292             | ✓ 292               | 423           | 0.00 | 199  | 100.00 | 359             | ✓ 359               |
| w200.002 | 420           | 0.00 | 75   | 99.40  | 145             | ✓ 146               | 420           | 0.00 | 101  | 99.40  | 202             | ✓ 204               | 420           | 0.00 | 124  | 99.40  | 250             | ✓ 256               |
| w200.003 | 455           | 0.00 | 135  | 98.35  | 778             | ✓ 793               | 455           | 0.00 | 142  | 99.56  | 1317            | ✓ 1323              | 455           | 0.00 | 213  | 100.00 | 1060            | ✓ 1060              |
| w200.004 | 431           | 0.00 | 96   | 99.19  | 168             | ✓ 169               | 431           | 0.00 | 125  | 99.54  | 254             | ✓ 255               | 431           | 0.00 | 130  | 100.00 | 396             | ✓ 396               |
| w200.005 | 427           | 0.00 | 97   | 100.00 | 164             | ✓ 164               | 427           | 0.00 | 116  | 100.00 | 199             | ✓ 199               | 427           | 0.00 | 132  | 100.00 | 234             | ✓ 234               |

†: Includes the time of GVNS.

**Table EC.6 RTSPTW( $\mathcal{T}_K$ ): Results on the instances of set GDE-I with 60 customers.**

| Instance | $\Delta = 20$ |      |      |        |                 |                     | $\Delta = 40$ |      |      |        |                 |                     | $\Delta = 60$ |      |      |        |                 |                     |
|----------|---------------|------|------|--------|-----------------|---------------------|---------------|------|------|--------|-----------------|---------------------|---------------|------|------|--------|-----------------|---------------------|
|          | GVNS          |      | CSP  |        | DP              |                     | GVNS          |      | CSP  |        | DP              |                     | GVNS          |      | CSP  |        | DP              |                     |
|          | $ub^*$        | %gap | time | %lb    | time $^\dagger$ | opt time $^\dagger$ | $ub^*$        | %gap | time | %lb    | time $^\dagger$ | opt time $^\dagger$ | $ub^*$        | %gap | time | %lb    | time $^\dagger$ | opt time $^\dagger$ |
| w120.001 | 418           | 0.00 | 164  | 100.00 | 216             | ✓ 216               | 443           | 0.00 | 171  | 99.77  | 211             | ✓ 212               | inf           | -    | 988  | -      | 1078            | ✓ 1078              |
| w120.002 | 514           | 0.00 | 88   | 99.12  | 145             | ✓ 145               | 518           | 0.00 | 226  | 100.00 | 266             | ✓ 266               | inf           | -    | 995  | -      | 1047            | ✓ 1047              |
| w120.003 | 407           | 0.00 | 170  | 100.00 | 196             | ✓ 196               | 414           | 0.00 | 240  | 100.00 | 301             | ✓ 301               | inf           | -    | 985  | -      | 1322            | ✓ 1322              |
| w120.004 | 490           | 0.00 | 65   | 99.91  | 89              | ✓ 89                | 503           | 0.00 | 67   | 100.00 | 131             | ✓ 131               | inf           | -    | 989  | -      | 1104            | ✓ 1104              |
| w120.005 | 565           | 0.00 | 120  | 100.00 | 150             | ✓ 150               | 566           | 0.00 | 162  | 100.00 | 187             | ✓ 187               | inf           | -    | 983  | -      | 1008            | ✓ 1008              |
| w140.001 | 423           | 0.00 | 108  | 100.00 | 136             | ✓ 136               | 474           | 0.00 | 214  | 100.00 | 254             | ✓ 254               | inf           | -    | 992  | -      | 1037            | ✓ 1037              |
| w140.002 | 474           | 0.00 | 201  | 100.00 | 226             | ✓ 226               | 477           | 5.66 | 145  | 100.00 | 350             | ✓ 350               | inf           | -    | 999  | -      | 1280            | ✓ 1280              |
| w140.003 | 439           | 0.00 | 66   | 100.00 | 90              | ✓ 90                | 444           | 0.00 | 100  | 100.00 | 141             | ✓ 141               | inf           | -    | 1005 | -      | 1653            | ✓ 1653              |
| w140.004 | inf           | -    | 997  | -      | 1117            | ✓ 1117              | inf           | -    | 992  | -      | 1027            | ✓ 1027              | inf           | -    | 982  | -      | 1022            | ✓ 1022              |
| w140.005 | 468           | 0.00 | 75   | 99.60  | 132             | ✓ 133               | 484           | 0.00 | 133  | 98.97  | 216             | ✓ 217               | inf           | -    | 992  | -      | 1709            | ✓ 1709              |
| w160.001 | 577           | 0.00 | 139  | 100.00 | 210             | ✓ 210               | 585           | 0.00 | 147  | 99.78  | 269             | ✓ 270               | 597           | 0.00 | 128  | 100.00 | 283             | ✓ 283               |
| w160.002 | 453           | 0.00 | 261  | 99.99  | 284             | ✓ 284               | 470           | 0.00 | 297  | 100.00 | 329             | ✓ 329               | 490           | 0.20 | 150  | 98.87  | 319             | ✓ 329               |
| w160.003 | 434           | 0.00 | 81   | 99.58  | 144             | ✓ 145               | 437           | 0.00 | 128  | 100.00 | 197             | ✓ 197               | 448           | 0.00 | 145  | 98.55  | 304             | ✓ 310               |
| w160.004 | 464           | 0.00 | 101  | 99.97  | 151             | ✓ 151               | 464           | 0.00 | 107  | 99.99  | 194             | ✓ 194               | 465           | 0.00 | 150  | 100.00 | 216             | ✓ 216               |
| w160.005 | 501           | 0.00 | 90   | 100.00 | 120             | ✓ 120               | 508           | 0.00 | 119  | 100.00 | 182             | ✓ 182               | 513           | 0.00 | 107  | 100.00 | 157             | ✓ 157               |
| w180.001 | 423           | 0.00 | 113  | 98.98  | 474             | ✓ 483               | 430           | 0.00 | 135  | 99.85  | 427             | ✓ 427               | 436           | 0.23 | 187  | 100.00 | 445             | ✓ 445               |
| w180.002 | 412           | 0.00 | 152  | 99.39  | 207             | ✓ 207               | 414           | 0.00 | 231  | 100.00 | 276             | ✓ 276               | 429           | 0.00 | 195  | 100.00 | 262             | ✓ 262               |
| w180.003 | 450           | 0.00 | 83   | 99.89  | 127             | ✓ 127               | 451           | 0.00 | 135  | 99.89  | 168             | ✓ 168               | 464           | 0.00 | 187  | 99.95  | 244             | ✓ 244               |
| w180.004 | 459           | 0.00 | 119  | 100.00 | 167             | ✓ 167               | 471           | 0.00 | 108  | 99.99  | 167             | ✓ 167               | 481           | 0.00 | 102  | 98.86  | 342             | ✓ 354               |
| w180.005 | 398           | 0.00 | 101  | 100.00 | 148             | ✓ 148               | 417           | 0.00 | 175  | 99.97  | 323             | ✓ 323               | 428           | 0.00 | 557  | 100.00 | 627             | ✓ 627               |
| w200.001 | 422           | 0.00 | 129  | 100.00 | 180             | ✓ 180               | 451           | 0.00 | 203  | 99.36  | 304             | ✓ 305               | 451           | 0.00 | 302  | 100.00 | 360             | ✓ 360               |
| w200.002 | 421           | 0.00 | 119  | 99.52  | 179             | ✓ 179               | 443           | 0.00 | 139  | 99.62  | 281             | ✓ 282               | 450           | 0.00 | 286  | 100.00 | 420             | ✓ 420               |
| w200.003 | 455           | 0.00 | 133  | 98.46  | 637             | ✓ 641               | 455           | 0.00 | 131  | 99.68  | 697             | ✓ 700               | 459           | 0.00 | 154  | 100.00 | 286             | ✓ 286               |
| w200.004 | 431           | 0.00 | 102  | 99.59  | 163             | ✓ 163               | 431           | 0.00 | 117  | 99.72  | 170             | ✓ 170               | 443           | 0.00 | 106  | 100.00 | 181             | ✓ 181               |
| w200.005 | 427           | 0.00 | 106  | 99.99  | 161             | ✓ 161               | 428           | 0.00 | 127  | 100.00 | 181             | ✓ 181               | 433           | 0.00 | 169  | 100.00 | 257             | ✓ 257               |

†: Includes the time of GVNS.

**Table EC.7 RTSPTW( $\mathcal{T}_K$ ): Results on the instances of set GDE-D with 40 customers.**

| Instance | $\Delta = 20$ |      |      |        |                   |                       | $\Delta = 40$ |      |      |        |                   |                       | $\Delta = 60$ |      |      |        |                   |                       |
|----------|---------------|------|------|--------|-------------------|-----------------------|---------------|------|------|--------|-------------------|-----------------------|---------------|------|------|--------|-------------------|-----------------------|
|          | ub*           | GVNS |      | CSP    |                   | DP                    | ub*           | GVNS |      | CSP    |                   | DP                    | ub*           | GVNS |      | CSP    |                   | DP                    |
|          |               | %gap | time | %lb    | time <sup>†</sup> | opt time <sup>†</sup> |               | %gap | time | %lb    | time <sup>†</sup> | opt time <sup>†</sup> |               | %gap | time | %lb    | time <sup>†</sup> | opt time <sup>†</sup> |
| w120.001 | 446           | 0.00 | 7    | 100.00 | 14                | ✓ 14                  | 446           | 0.00 | 8    | 100.00 | 15                | ✓ 15                  | 446           | 0.00 | 9    | 100.00 | 31                | ✓ 31                  |
| w120.002 | 463           | 0.00 | 6    | 100.00 | 14                | ✓ 14                  | 500           | 0.00 | 8    | 100.00 | 17                | ✓ 17                  | 504           | 0.00 | 11   | 100.00 | 27                | ✓ 27                  |
| w120.003 | 379           | 0.26 | 11   | 99.87  | 31                | ✓ 31                  | 384           | 0.00 | 18   | 100.00 | 44                | ✓ 44                  | 385           | 0.00 | 18   | 100.00 | 45                | ✓ 45                  |
| w120.004 | 307           | 0.00 | 9    | 100.00 | 16                | ✓ 16                  | 338           | 0.00 | 16   | 100.00 | 36                | ✓ 36                  | 338           | 0.00 | 46   | 100.00 | 66                | ✓ 66                  |
| w120.005 | 350           | 0.00 | 9    | 100.00 | 14                | ✓ 14                  | 350           | 0.00 | 13   | 100.00 | 18                | ✓ 18                  | 350           | 0.00 | 11   | 100.00 | 16                | ✓ 16                  |
| w140.001 | 364           | 0.00 | 9    | 99.99  | 35                | ✓ 35                  | 364           | 0.00 | 10   | 100.00 | 39                | ✓ 39                  | 364           | 0.00 | 10   | 100.00 | 43                | ✓ 43                  |
| w140.002 | 383           | 0.00 | 10   | 100.00 | 18                | ✓ 18                  | 383           | 0.00 | 9    | 100.00 | 22                | ✓ 22                  | 383           | 0.00 | 10   | 100.00 | 20                | ✓ 20                  |
| w140.003 | 416           | 0.00 | 9    | 100.00 | 28                | ✓ 28                  | 416           | 0.00 | 11   | 100.00 | 30                | ✓ 30                  | 416           | 0.00 | 14   | 100.00 | 38                | ✓ 38                  |
| w140.004 | 352           | 0.00 | 8    | 99.99  | 17                | ✓ 17                  | 365           | 0.00 | 20   | 99.97  | 37                | ✓ 37                  | 365           | 0.00 | 19   | 100.00 | 42                | ✓ 42                  |
| w140.005 | 375           | 0.00 | 10   | 100.00 | 26                | ✓ 26                  | 378           | 0.00 | 12   | 100.00 | 38                | ✓ 38                  | 382           | 0.00 | 16   | 100.00 | 55                | ✓ 55                  |
| w160.001 | 359           | 0.00 | 34   | 100.00 | 45                | ✓ 45                  | 360           | 0.00 | 31   | 100.00 | 43                | ✓ 43                  | 360           | 0.00 | 28   | 100.00 | 43                | ✓ 43                  |
| w160.002 | 345           | 0.00 | 28   | 100.00 | 36                | ✓ 36                  | 345           | 0.00 | 21   | 100.00 | 31                | ✓ 31                  | 345           | 2.90 | 17   | 100.00 | 70                | ✓ 70                  |
| w160.003 | 368           | 0.00 | 11   | 100.00 | 61                | ✓ 61                  | 368           | 0.00 | 11   | 100.00 | 53                | ✓ 53                  | 368           | 0.00 | 16   | 100.00 | 87                | ✓ 87                  |
| w160.004 | 290           | 0.00 | 13   | 99.77  | 44                | ✓ 44                  | 297           | 0.00 | 20   | 99.99  | 155               | ✓ 155                 | 297           | 0.00 | 18   | 100.00 | 268               | ✓ 268                 |
| w160.005 | 315           | 0.00 | 10   | 100.00 | 50                | ✓ 50                  | 315           | 0.00 | 11   | 100.00 | 36                | ✓ 36                  | 315           | 0.00 | 10   | 100.00 | 124               | ✓ 124                 |
| w180.001 | 339           | 0.00 | 9    | 100.00 | 23                | ✓ 23                  | 340           | 0.00 | 10   | 100.00 | 30                | ✓ 30                  | 365           | 0.00 | 29   | 97.02  | 162               | ✓ 269                 |
| w180.002 | 358           | 0.00 | 10   | 99.55  | 45                | ✓ 46                  | 358           | 0.00 | 12   | 100.00 | 33                | ✓ 33                  | 378           | 0.00 | 48   | 100.00 | 183               | ✓ 183                 |
| w180.003 | 282           | 0.00 | 12   | 100.00 | 25                | ✓ 25                  | 299           | 0.00 | 23   | 100.00 | 51                | ✓ 51                  | 299           | 0.00 | 21   | 100.00 | 62                | ✓ 62                  |
| w180.004 | 372           | 0.00 | 11   | 100.00 | 22                | ✓ 22                  | 372           | 0.00 | 13   | 100.00 | 26                | ✓ 26                  | 372           | 0.00 | 16   | 100.00 | 39                | ✓ 39                  |
| w180.005 | 335           | 0.00 | 12   | 100.00 | 59                | ✓ 59                  | 335           | 0.00 | 11   | 100.00 | 76                | ✓ 76                  | 335           | 0.00 | 12   | 100.00 | 45                | ✓ 45                  |
| w200.001 | 330           | 0.00 | 16   | 100.00 | 27                | ✓ 27                  | 349           | 0.00 | 20   | 99.00  | 128               | ✓ 132                 | 349           | 0.00 | 21   | 100.00 | 89                | ✓ 89                  |
| w200.002 | 314           | 0.00 | 40   | 99.46  | 85                | ✓ 86                  | 314           | 0.00 | 40   | 99.84  | 120               | ✓ 120                 | 314           | 0.00 | 35   | 99.84  | 222               | ✓ 222                 |
| w200.003 | 342           | 0.00 | 11   | 93.64  | 83                | ✓ 150                 | 342           | 0.00 | 10   | 94.85  | 111               | ✓ 237                 | 342           | 0.00 | 11   | 95.76  | 143               | ✓ 572                 |
| w200.004 | 301           | 0.00 | 12   | 100.00 | 27                | ✓ 27                  | 301           | 0.00 | 12   | 100.00 | 61                | ✓ 61                  | 302           | 0.00 | 14   | 100.00 | 74                | ✓ 74                  |
| w200.005 | 310           | 0.00 | 16   | 99.42  | 77                | ✓ 80                  | 310           | 0.00 | 17   | 99.87  | 84                | ✓ 84                  | 310           | 0.00 | 23   | 100.00 | 93                | ✓ 93                  |

†: Includes the time of GVNS.

**Table EC.8 RTSPTW( $\mathcal{T}_K$ ): Results on the instances of set GDE-I with 40 customers.**

| Instance | $\Delta = 20$ |      |      |        |                   |                       | $\Delta = 40$ |      |      |        |                   |                       | $\Delta = 60$ |      |      |        |                   |                       |
|----------|---------------|------|------|--------|-------------------|-----------------------|---------------|------|------|--------|-------------------|-----------------------|---------------|------|------|--------|-------------------|-----------------------|
|          | ub*           | GVNS |      | CSP    |                   | DP                    | ub*           | GVNS |      | CSP    |                   | DP                    | ub*           | GVNS |      | CSP    |                   | DP                    |
|          |               | %gap | time | %lb    | time <sup>†</sup> | opt time <sup>†</sup> |               | %gap | time | %lb    | time <sup>†</sup> | opt time <sup>†</sup> |               | %gap | time | %lb    | time <sup>†</sup> | opt time <sup>†</sup> |
| w120.001 | 446           | 0.00 | 7    | 100.00 | 13                | ✓ 13                  | 446           | 0.00 | 8    | 100.00 | 14                | ✓ 14                  | inf           | -    | 659  | -      | 671               | ✓ 671                 |
| w120.002 | 444           | 0.00 | 6    | 100.00 | 14                | ✓ 14                  | 450           | 0.00 | 11   | 100.00 | 18                | ✓ 18                  | 469           | 0.00 | 12   | 100.00 | 22                | ✓ 22                  |
| w120.003 | 393           | 0.00 | 13   | 100.00 | 34                | ✓ 34                  | 429           | 0.00 | 23   | 100.00 | 53                | ✓ 53                  | inf           | -    | 659  | -      | 684               | ✓ 684                 |
| w120.004 | 325           | 0.00 | 17   | 100.00 | 36                | ✓ 36                  | 358           | 0.00 | 17   | 100.00 | 36                | ✓ 36                  | inf           | -    | 659  | -      | 680               | ✓ 680                 |
| w120.005 | 350           | 0.00 | 11   | 100.00 | 17                | ✓ 17                  | 381           | 0.00 | 33   | 100.00 | 40                | ✓ 40                  | 405           | 0.00 | 14   | 100.00 | 36                | ✓ 36                  |
| w140.001 | 366           | 0.00 | 11   | 100.00 | 23                | ✓ 23                  | 366           | 0.00 | 10   | 100.00 | 25                | ✓ 25                  | 369           | 0.00 | 14   | 100.00 | 32                | ✓ 32                  |
| w140.002 | 383           | 0.00 | 9    | 100.00 | 16                | ✓ 16                  | 383           | 0.00 | 9    | 100.00 | 21                | ✓ 21                  | 383           | 0.00 | 10   | 100.00 | 24                | ✓ 24                  |
| w140.003 | 416           | 0.00 | 9    | 100.00 | 20                | ✓ 20                  | 416           | 0.00 | 9    | 100.00 | 16                | ✓ 16                  | inf           | -    | 659  | -      | 669               | ✓ 669                 |
| w140.004 | 352           | 0.00 | 8    | 100.00 | 17                | ✓ 17                  | 367           | 0.00 | 29   | 100.00 | 40                | ✓ 40                  | 399           | 0.00 | 63   | 100.00 | 83                | ✓ 83                  |
| w140.005 | 375           | 0.00 | 8    | 100.00 | 25                | ✓ 25                  | 378           | 0.00 | 12   | 100.00 | 29                | ✓ 29                  | 386           | 0.00 | 14   | 100.00 | 34                | ✓ 34                  |
| w160.001 | 360           | 0.00 | 42   | 100.00 | 50                | ✓ 50                  | 360           | 0.00 | 43   | 100.00 | 52                | ✓ 52                  | 370           | 0.00 | 32   | 100.00 | 42                | ✓ 42                  |
| w160.002 | 351           | 0.00 | 18   | 100.00 | 32                | ✓ 32                  | 369           | 0.00 | 24   | 99.59  | 59                | ✓ 59                  | 372           | 0.00 | 19   | 100.00 | 38                | ✓ 38                  |
| w160.003 | 368           | 0.00 | 12   | 100.00 | 58                | ✓ 58                  | 368           | 0.00 | 11   | 100.00 | 33                | ✓ 33                  | 381           | 0.00 | 16   | 100.00 | 43                | ✓ 43                  |
| w160.004 | 297           | 0.00 | 12   | 99.86  | 76                | ✓ 76                  | 300           | 0.00 | 32   | 100.00 | 93                | ✓ 93                  | 308           | 0.00 | 19   | 99.90  | 54                | ✓ 54                  |
| w160.005 | 315           | 0.00 | 10   | 100.00 | 31                | ✓ 31                  | 315           | 0.00 | 10   | 100.00 | 38                | ✓ 38                  | 315           | 0.00 | 10   | 100.00 | 54                | ✓ 54                  |
| w180.001 | 353           | 0.00 | 10   | 98.18  | 40                | ✓ 40                  | 355           | 0.00 | 13   | 100.00 | 35                | ✓ 35                  | 380           | 0.00 | 17   | 99.13  | 86                | ✓ 88                  |
| w180.002 | 358           | 0.00 | 10   | 99.77  | 35                | ✓ 35                  | 359           | 0.00 | 14   | 100.00 | 28                | ✓ 28                  | 378           | 0.00 | 19   | 100.00 | 49                | ✓ 49                  |
| w180.003 | 285           | 0.00 | 13   | 99.96  | 26                | ✓ 26                  | 323           | 0.00 | 21   | 99.99  | 45                | ✓ 45                  | 348           | 0.00 | 22   | 100.00 | 44                | ✓ 44                  |
| w180.004 | 372           | 0.00 | 12   | 99.93  | 25                | ✓ 25                  | 376           | 0.00 | 16   | 100.00 | 29                | ✓ 29                  | 392           | 0.00 | 16   | 99.87  | 34                | ✓ 34                  |
| w180.005 | 335           | 0.00 | 12   | 100.00 | 53                | ✓ 53                  | 335           | 0.00 | 11   | 100.00 | 49                | ✓ 49                  | 335           | 0.00 | 20   | 100.00 | 45                | ✓ 45                  |
| w200.001 | 335           | 0.00 | 13   | 100.00 | 31                | ✓ 31                  | 350           | 0.00 | 22   | 99.93  | 67                | ✓ 67                  | 350           | 0.00 | 24   | 100.00 | 54                | ✓ 54                  |
| w200.002 | 317           | 0.00 | 52   | 99.86  | 93                | ✓ 93                  | 317           | 0.00 | 46   | 100.00 | 85                | ✓ 85                  | 318           | 0.00 | 27   | 100.00 | 76                | ✓ 76                  |
| w200.003 | 342           | 0.00 | 10   | 93.64  | 80                | ✓ 98                  | 342           | 0.88 | 11   | 95.09  | 70                | ✓ 88                  | 342           | 0.00 | 13   | 98.92  | 74                | ✓ 75                  |
| w200.004 | 301           | 0.00 | 13   | 100.00 | 26                | ✓ 26                  | 319           | 0.00 | 13   | 100.00 | 42                | ✓ 42                  | inf           | -    | 659  | -      | 690               | ✓ 690                 |
| w200.005 | 311           | 0.00 | 14   | 99.98  | 50                | ✓ 50                  | 329           | 0.30 | 27   | 99.42  | 92                | ✓ 93                  | 352           | 1.70 | 40   | 97.05  | 297               | ✓ 456                 |

†: Includes the time of GVNS.

**Table EC.9 RTSPTW( $\mathcal{T}_K$ ): Results on the instances of set GDE-D with 20 customers.**

| Instance | $\Delta = 20$ |           |     |                 |                     |   | $\Delta = 40$ |           |      |                 |                     |    | $\Delta = 60$ |           |     |                 |                     |        |    |   |    |
|----------|---------------|-----------|-----|-----------------|---------------------|---|---------------|-----------|------|-----------------|---------------------|----|---------------|-----------|-----|-----------------|---------------------|--------|----|---|----|
|          | GVNS          |           | CSP |                 | DP                  |   | GVNS          |           | CSP  |                 | DP                  |    | GVNS          |           | CSP |                 | DP                  |        |    |   |    |
|          | $ub^*$        | %gap time | %lb | time $^\dagger$ | opt time $^\dagger$ |   | $ub^*$        | %gap time | %lb  | time $^\dagger$ | opt time $^\dagger$ |    | $ub^*$        | %gap time | %lb | time $^\dagger$ | opt time $^\dagger$ |        |    |   |    |
| w120.001 | 309           | 0.00      | 0   | 100.00          | 6                   | ✓ | 6             | 313       | 0.00 | 0               | 100.00              | 6  | ✓             | 6         | 313 | 0.00            | 0                   | 100.00 | 6  | ✓ | 6  |
| w120.002 | 219           | 0.00      | 0   | 100.00          | 5                   | ✓ | 5             | 221       | 0.00 | 0               | 100.00              | 5  | ✓             | 5         | 221 | 0.00            | 1                   | 100.00 | 5  | ✓ | 5  |
| w120.003 | 303           | 0.00      | 0   | 100.00          | 4                   | ✓ | 4             | 303       | 0.00 | 0               | 100.00              | 4  | ✓             | 4         | 312 | 0.00            | 0                   | 100.00 | 4  | ✓ | 4  |
| w120.004 | 334           | 0.00      | 0   | 100.00          | 4                   | ✓ | 4             | 377       | 0.00 | 0               | 100.00              | 5  | ✓             | 5         | 377 | 0.00            | 0                   | 100.00 | 5  | ✓ | 5  |
| w120.005 | 240           | 0.00      | 0   | 100.00          | 4                   | ✓ | 4             | 281       | 0.00 | 0               | 100.00              | 4  | ✓             | 4         | 281 | 0.00            | 0                   | 100.00 | 4  | ✓ | 4  |
| w140.001 | 176           | 0.00      | 0   | 100.00          | 5                   | ✓ | 5             | 181       | 0.00 | 0               | 100.00              | 5  | ✓             | 5         | 181 | 7.18            | 0                   | 100.00 | 5  | ✓ | 5  |
| w140.002 | 272           | 0.00      | 0   | 100.00          | 4                   | ✓ | 4             | 280       | 0.00 | 0               | 100.00              | 5  | ✓             | 5         | 280 | 0.00            | 0                   | 100.00 | 5  | ✓ | 5  |
| w140.003 | 236           | 0.00      | 0   | 100.00          | 5                   | ✓ | 5             | 236       | 0.00 | 0               | 100.00              | 5  | ✓             | 5         | 236 | 0.00            | 0                   | 100.00 | 5  | ✓ | 5  |
| w140.004 | 272           | 0.00      | 0   | 97.24           | 6                   | ✓ | 7             | 289       | 0.00 | 0               | 99.65               | 10 | ✓             | 11        | 293 | 0.00            | 0                   | 100.00 | 7  | ✓ | 7  |
| w140.005 | 225           | 0.00      | 0   | 100.00          | 5                   | ✓ | 5             | 225       | 0.00 | 0               | 100.00              | 5  | ✓             | 5         | 225 | 0.00            | 0                   | 100.00 | 5  | ✓ | 5  |
| w160.001 | 245           | 0.00      | 0   | 100.00          | 5                   | ✓ | 5             | 245       | 0.00 | 0               | 100.00              | 5  | ✓             | 5         | 245 | 0.00            | 0                   | 100.00 | 5  | ✓ | 5  |
| w160.002 | 201           | 0.00      | 0   | 100.00          | 5                   | ✓ | 5             | 201       | 0.00 | 0               | 100.00              | 4  | ✓             | 4         | 201 | 0.00            | 0                   | 100.00 | 4  | ✓ | 4  |
| w160.003 | 267           | 0.00      | 0   | 100.00          | 8                   | ✓ | 8             | 270       | 0.00 | 0               | 96.67               | 10 | ✓             | 10        | 272 | 0.00            | 0                   | 96.69  | 16 | ✓ | 16 |
| w160.004 | 203           | 0.00      | 0   | 100.00          | 7                   | ✓ | 7             | 203       | 0.00 | 0               | 100.00              | 7  | ✓             | 7         | 203 | 0.00            | 0                   | 100.00 | 7  | ✓ | 7  |
| w160.005 | 247           | 0.00      | 0   | 100.00          | 5                   | ✓ | 5             | 247       | 0.00 | 0               | 100.00              | 5  | ✓             | 5         | 247 | 0.00            | 0                   | 100.00 | 5  | ✓ | 5  |
| w180.001 | 253           | 0.00      | 0   | 100.00          | 4                   | ✓ | 4             | 264       | 0.00 | 0               | 100.00              | 5  | ✓             | 5         | 270 | 0.00            | 0                   | 100.00 | 5  | ✓ | 5  |
| w180.002 | 265           | 0.00      | 0   | 100.00          | 5                   | ✓ | 5             | 266       | 0.00 | 0               | 100.00              | 5  | ✓             | 5         | 271 | 0.00            | 0                   | 100.00 | 5  | ✓ | 5  |
| w180.003 | 275           | 0.00      | 0   | 100.00          | 5                   | ✓ | 5             | 275       | 0.00 | 0               | 100.00              | 5  | ✓             | 5         | 275 | 0.00            | 0                   | 100.00 | 5  | ✓ | 5  |
| w180.004 | 215           | 0.00      | 0   | 100.00          | 5                   | ✓ | 5             | 242       | 0.00 | 0               | 100.00              | 9  | ✓             | 9         | 242 | 0.00            | 0                   | 100.00 | 7  | ✓ | 7  |
| w180.005 | 193           | 0.00      | 0   | 100.00          | 5                   | ✓ | 5             | 206       | 0.00 | 0               | 100.00              | 5  | ✓             | 5         | 206 | 0.00            | 0                   | 100.00 | 6  | ✓ | 6  |
| w200.001 | 233           | 0.00      | 0   | 99.97           | 6                   | ✓ | 6             | 234       | 0.00 | 0               | 100.00              | 6  | ✓             | 6         | 234 | 0.00            | 0                   | 100.00 | 5  | ✓ | 5  |
| w200.002 | 205           | 0.00      | 0   | 99.99           | 5                   | ✓ | 5             | 205       | 0.00 | 0               | 99.96               | 6  | ✓             | 6         | 205 | 0.00            | 0                   | 99.96  | 5  | ✓ | 5  |
| w200.003 | 249           | 0.00      | 0   | 100.00          | 8                   | ✓ | 8             | 249       | 0.00 | 0               | 100.00              | 7  | ✓             | 7         | 249 | 0.00            | 0                   | 100.00 | 11 | ✓ | 11 |
| w200.004 | 293           | 0.00      | 0   | 100.00          | 6                   | ✓ | 6             | 320       | 0.31 | 0               | 99.14               | 14 | ✓             | 14        | 325 | 0.00            | 1                   | 100.00 | 13 | ✓ | 13 |
| w200.005 | 236           | 0.00      | 0   | 100.00          | 6                   | ✓ | 6             | 236       | 0.00 | 0               | 100.00              | 7  | ✓             | 7         | 236 | 0.00            | 0                   | 100.00 | 6  | ✓ | 6  |

†: Includes the time of GVNS.

**Table EC.10 RTSPTW( $\mathcal{T}_K$ ): Results on the instances of set GDE-I with 20 customers.**

| Instance | $\Delta = 20$ |           |     |                 |                     |   | $\Delta = 40$ |           |      |                 |                     |    | $\Delta = 60$ |           |     |                 |                     |        |     |   |     |
|----------|---------------|-----------|-----|-----------------|---------------------|---|---------------|-----------|------|-----------------|---------------------|----|---------------|-----------|-----|-----------------|---------------------|--------|-----|---|-----|
|          | GVNS          |           | CSP |                 | DP                  |   | GVNS          |           | CSP  |                 | DP                  |    | GVNS          |           | CSP |                 | DP                  |        |     |   |     |
|          | $ub^*$        | %gap time | %lb | time $^\dagger$ | opt time $^\dagger$ |   | $ub^*$        | %gap time | %lb  | time $^\dagger$ | opt time $^\dagger$ |    | $ub^*$        | %gap time | %lb | time $^\dagger$ | opt time $^\dagger$ |        |     |   |     |
| w120.001 | 313           | 0.00      | 0   | 100.00          | 5                   | ✓ | 5             | 313       | 0.00 | 0               | 100.00              | 4  | ✓             | 4         | inf | -               | 419                 | -      | 424 | ✓ | 424 |
| w120.002 | 222           | 0.00      | 0   | 100.00          | 5                   | ✓ | 5             | 231       | 0.00 | 0               | 100.00              | 5  | ✓             | 5         | 248 | 0.00            | 0                   | 100.00 | 6   | ✓ | 6   |
| w120.003 | 303           | 0.00      | 0   | 100.00          | 4                   | ✓ | 4             | 312       | 0.00 | 0               | 100.00              | 5  | ✓             | 5         | inf | -               | 419                 | -      | 423 | ✓ | 423 |
| w120.004 | 377           | 0.00      | 0   | 100.00          | 5                   | ✓ | 5             | 389       | 0.00 | 0               | 100.00              | 5  | ✓             | 5         | 391 | 0.00            | 0                   | 100.00 | 5   | ✓ | 5   |
| w120.005 | 240           | 0.00      | 0   | 100.00          | 4                   | ✓ | 4             | 293       | 0.00 | 0               | 100.00              | 5  | ✓             | 5         | 323 | 0.00            | 338                 | 100.00 | 343 | ✓ | 343 |
| w140.001 | 176           | 0.00      | 0   | 100.00          | 4                   | ✓ | 4             | 207       | 0.00 | 0               | 100.00              | 5  | ✓             | 5         | 210 | 0.00            | 0                   | 100.00 | 5   | ✓ | 5   |
| w140.002 | 272           | 0.00      | 0   | 100.00          | 5                   | ✓ | 5             | 280       | 0.00 | 0               | 100.00              | 5  | ✓             | 5         | 280 | 0.00            | 0                   | 100.00 | 5   | ✓ | 5   |
| w140.003 | 236           | 0.00      | 0   | 100.00          | 5                   | ✓ | 5             | 244       | 0.00 | 0               | 100.00              | 5  | ✓             | 5         | 250 | 0.00            | 0                   | 100.00 | 5   | ✓ | 5   |
| w140.004 | 272           | 0.00      | 0   | 97.24           | 7                   | ✓ | 7             | 293       | 0.00 | 0               | 98.98               | 8  | ✓             | 8         | inf | -               | 419                 | -      | 424 | ✓ | 424 |
| w140.005 | 225           | 0.00      | 0   | 100.00          | 4                   | ✓ | 4             | 243       | 0.00 | 0               | 100.00              | 5  | ✓             | 5         | inf | -               | 419                 | -      | 424 | ✓ | 424 |
| w160.001 | 245           | 0.00      | 0   | 100.00          | 5                   | ✓ | 5             | 245       | 0.00 | 0               | 100.00              | 5  | ✓             | 5         | 270 | 0.00            | 0                   | 100.00 | 6   | ✓ | 6   |
| w160.002 | 201           | 0.00      | 0   | 100.00          | 4                   | ✓ | 4             | 201       | 0.00 | 0               | 100.00              | 4  | ✓             | 4         | 201 | 0.00            | 0                   | 100.00 | 5   | ✓ | 5   |
| w160.003 | 270           | 0.00      | 0   | 100.00          | 6                   | ✓ | 6             | 278       | 0.00 | 0               | 99.94               | 6  | ✓             | 6         | 295 | 0.00            | 1                   | 100.00 | 7   | ✓ | 7   |
| w160.004 | 204           | 0.00      | 0   | 100.00          | 5                   | ✓ | 5             | 204       | 0.00 | 0               | 100.00              | 6  | ✓             | 6         | 204 | 0.00            | 0                   | 100.00 | 4   | ✓ | 4   |
| w160.005 | 247           | 0.00      | 0   | 100.00          | 5                   | ✓ | 5             | 247       | 0.00 | 0               | 100.00              | 5  | ✓             | 5         | 247 | 0.00            | 0                   | 100.00 | 4   | ✓ | 4   |
| w180.001 | 253           | 0.00      | 0   | 100.00          | 4                   | ✓ | 4             | 253       | 0.00 | 0               | 100.00              | 4  | ✓             | 4         | 262 | 0.00            | 0                   | 100.00 | 5   | ✓ | 5   |
| w180.002 | 276           | 0.00      | 0   | 100.00          | 5                   | ✓ | 5             | 276       | 0.00 | 0               | 100.00              | 5  | ✓             | 5         | 276 | 0.00            | 0                   | 100.00 | 5   | ✓ | 5   |
| w180.003 | 275           | 0.00      | 0   | 100.00          | 5                   | ✓ | 5             | 292       | 0.00 | 0               | 100.00              | 5  | ✓             | 5         | 292 | 0.00            | 0                   | 100.00 | 5   | ✓ | 5   |
| w180.004 | 215           | 0.00      | 0   | 100.00          | 5                   | ✓ | 5             | 243       | 0.00 | 0               | 100.00              | 7  | ✓             | 7         | 243 | 0.00            | 0                   | 100.00 | 7   | ✓ | 7   |
| w180.005 | 193           | 0.00      | 0   | 100.00          | 5                   | ✓ | 5             | 206       | 0.00 | 0               | 100.00              | 5  | ✓             | 5         | 207 | 0.00            | 0                   | 100.00 | 5   | ✓ | 5   |
| w200.001 | 233           | 0.00      | 0   | 99.99           | 5                   | ✓ | 5             | 234       | 0.00 | 0               | 100.00              | 5  | ✓             | 5         | 234 | 0.00            | 0                   | 100.00 | 5   | ✓ | 5   |
| w200.002 | 205           | 0.00      | 0   | 99.99           | 5                   | ✓ | 5             | 205       | 0.00 | 0               | 99.97               | 5  | ✓             | 5         | 211 | 0.00            | 0                   | 100.00 | 6   | ✓ | 6   |
| w200.003 | 249           | 0.00      | 0   | 100.00          | 16                  | ✓ | 16            | 267       | 0.00 | 0               | 100.00              | 15 | ✓             | 15        | 271 | 0.00            | 0                   | 100.00 | 9   | ✓ | 9   |
| w200.004 | 293           | 0.00      | 0   | 100.00          | 6                   | ✓ | 6             | 322       | 0.00 | 0               | 99.84               | 11 | ✓             | 11        | 337 | 0.00            | 0                   | 98.96  | 11  | ✓ | 11  |
| w200.005 | 236           | 0.00      | 0   | 99.87           | 6                   | ✓ | 6             | 236       | 0.00 | 0               | 100.00              | 6  | ✓             | 6         | 236 | 0.00            | 0                   | 100.00 | 6   | ✓ | 6   |

†: Includes the time of GVNS.

**Table EC.11 RTSPTW( $\mathcal{T}_C$ ): Results on the instances of set GDE-D with 80 customers.**

| Instance | $\Gamma = 1$ |      |      |        |                 |                     | $\Gamma = 7$ |      |      |        |                 |                     | $\Gamma = 12$ |      |      |        |                 |                     |
|----------|--------------|------|------|--------|-----------------|---------------------|--------------|------|------|--------|-----------------|---------------------|---------------|------|------|--------|-----------------|---------------------|
|          | GVNS         |      | CSP  |        | DP              |                     | GVNS         |      | CSP  |        | DP              |                     | GVNS          |      | CSP  |        | DP              |                     |
|          | $ub^*$       | %gap | time | %lb    | time $^\dagger$ | opt time $^\dagger$ | $ub^*$       | %gap | time | %lb    | time $^\dagger$ | opt time $^\dagger$ | $ub^*$        | %gap | time | %lb    | time $^\dagger$ | opt time $^\dagger$ |
| w100.001 | 587          | 0.00 | 599  | 100.00 | 633             | ✓ 633               | inf          | -    | 1303 | -      | 3987            | ✓ 3987              | inf           | -    | 1304 | -      | 2803            | ✓ 2803              |
| w100.002 | 575          | 0.35 | 576  | 99.91  | 595             | ✓ 595               | ?            | -    | 1304 | -      | 4089            | ✓ 4089              | inf           | -    | 1304 | -      | 4171            | ✓ 4171              |
| w100.003 | 586          | 0.00 | 253  | 100.00 | 276             | ✓ 276               | inf          | -    | 1302 | -      | 1865            | ✓ 1865              | inf           | -    | 1306 | -      | 2043            | ✓ 2043              |
| w100.004 | 661          | 0.00 | 591  | 100.00 | 609             | ✓ 609               | inf          | -    | 1303 | -      | 1600            | ✓ 1600              | inf           | -    | 1305 | -      | 1749            | ✓ 1749              |
| w100.005 | 557          | 0.00 | 674  | 100.00 | 939             | ✓ 939               | inf          | -    | 1302 | -      | 3510            | ✓ 3510              | inf           | -    | 1305 | -      | 4758            | ✓ 4758              |
| w120.001 | 517          | 0.00 | 152  | 99.53  | 328             | ✓ 328               | 519          | 0.00 | 169  | 100.00 | 454             | ✓ 454               | 519           | 0.00 | 299  | 100.00 | 660             | ✓ 660               |
| w120.002 | 577          | 0.00 | 92   | 99.91  | 148             | ✓ 148               | 577          | 0.00 | 169  | 99.93  | 250             | ✓ 250               | 577           | 0.00 | 234  | 100.00 | 381             | ✓ 381               |
| w120.003 | 544          | 0.00 | 386  | 100.00 | 437             | ✓ 437               | 583          | 0.00 | 465  | 100.00 | 793             | ✓ 793               | 613           | 0.00 | 1058 | 99.99  | 1840            | ✓ 1840              |
| w120.004 | 506          | 0.00 | 257  | 99.09  | 340             | ✓ 341               | 515          | 0.00 | 529  | 99.57  | 818             | ✓ 820               | 518           | 0.00 | 426  | 99.85  | 791             | ✓ 791               |
| w120.005 | 615          | 0.00 | 663  | 99.19  | 830             | ✓ 832               | 622          | 0.00 | 798  | 99.39  | 1391            | ✓ 1396              | 661           | 0.00 | 1142 | 89.37  | t.l.            | -                   |
| w140.001 | 515          | 0.00 | 231  | 100.00 | 332             | ✓ 332               | 515          | 0.00 | 374  | 100.00 | 780             | ✓ 780               | 515           | 0.00 | 562  | 100.00 | 1146            | ✓ 1146              |
| w140.002 | 501          | 0.00 | 260  | 96.85  | 4195            | ✓ 4697              | 526          | 0.00 | 810  | 99.33  | 3083            | ✓ 3095              | 530           | 0.00 | 992  | 84.87  | t.l.            | -                   |
| w140.003 | 603          | 0.00 | 461  | 98.62  | 670             | ✓ 696               | 603          | 0.00 | 420  | 99.37  | 990             | ✓ 993               | 613           | 0.33 | 472  | 99.43  | 2818            | ✓ 2834              |
| w140.004 | 429          | 0.70 | 405  | 98.33  | 689             | ✓ 692               | 449          | 0.45 | 494  | 97.89  | 1453            | ✓ 1465              | 474           | 0.00 | 841  | 96.41  | 3393            | ✓ 3488              |
| w140.005 | 558          | 0.00 | 360  | 100.00 | 446             | ✓ 446               | 573          | 0.00 | 385  | 100.00 | 585             | ✓ 585               | 574           | 0.00 | 285  | 100.00 | 633             | ✓ 633               |
| w160.001 | 506          | 0.00 | 483  | 100.00 | 1520            | ✓ 1520              | 512          | 0.39 | 507  | 100.00 | 1276            | ✓ 1276              | 520           | 0.77 | 784  | 100.00 | 3768            | ✓ 3768              |
| w160.002 | 556          | 0.00 | 382  | 97.99  | 1525            | ✓ 2773              | 585          | 0.00 | 604  | 75.78  | t.l.            | -                   | 590           | 0.00 | 1250 | 0.00   | t.l.            | -                   |
| w160.003 | 531          | 0.00 | 168  | 98.62  | 1136            | ✓ 1142              | 533          | 0.00 | 236  | 98.78  | 1898            | ✓ 1909              | 533           | 0.00 | 135  | 99.44  | 2258            | ✓ 2272              |
| w160.004 | 514          | 0.00 | 385  | 99.68  | 916             | ✓ 919               | 517          | 0.00 | 495  | 100.00 | 1470            | ✓ 1470              | 517           | 0.58 | 549  | 100.00 | 1795            | ✓ 1795              |
| w160.005 | 444          | 0.00 | 262  | 99.27  | 543             | ✓ 545               | 454          | 2.42 | 438  | 100.00 | 1543            | ✓ 1543              | 455           | 2.42 | 328  | 100.00 | 1337            | ✓ 1337              |
| w180.001 | 551          | 0.00 | 152  | 99.51  | 460             | ✓ 461               | 574          | 0.17 | 357  | 99.96  | 1773            | ✓ 1778              | 582           | 0.52 | 460  | 100.00 | 2903            | ✓ 2903              |
| w180.002 | 508          | 0.00 | 423  | 99.15  | 1230            | ✓ 1234              | 515          | 0.00 | 497  | 99.80  | 1691            | ✓ 1695              | 518           | 0.00 | 484  | 99.52  | 2597            | ✓ 2613              |
| w180.003 | 533          | 0.38 | 52   | 99.04  | 921             | ✓ 944               | 539          | 0.00 | 236  | 99.99  | 2462            | ✓ 2462              | 541           | 0.00 | 364  | 99.76  | 2890            | ✓ 2899              |
| w180.004 | 480          | 0.00 | 159  | 99.65  | 398             | ✓ 398               | 488          | 0.00 | 205  | 100.00 | 732             | ✓ 732               | 491           | 0.00 | 186  | 99.92  | 1587            | ✓ 1587              |
| w180.005 | 473          | 0.00 | 538  | 99.33  | 765             | ✓ 766               | 475          | 0.00 | 322  | 100.00 | 747             | ✓ 747               | 475           | 0.00 | 585  | 100.00 | 894             | ✓ 894               |
| w200.001 | 493          | 0.00 | 47   | 99.47  | 1010            | ✓ 1015              | 499          | 0.00 | 405  | 99.71  | 2926            | ✓ 2937              | 502           | 0.20 | 478  | 99.60  | 4813            | ✓ 4892              |
| w200.002 | 508          | 0.00 | 164  | 99.47  | 366             | ✓ 367               | 508          | 0.00 | 118  | 100.00 | 383             | ✓ 383               | 511           | 0.20 | 60   | 99.93  | 561             | ✓ 562               |
| w200.003 | 464          | 0.00 | 162  | 99.53  | 475             | ✓ 476               | 464          | 0.00 | 144  | 100.00 | 544             | ✓ 544               | 467           | 0.00 | 227  | 99.99  | 1031            | ✓ 1031              |
| w200.004 | 526          | 0.00 | 167  | 99.14  | 548             | ✓ 548               | 535          | 0.00 | 197  | 99.66  | 1350            | ✓ 1355              | 537           | 0.00 | 533  | 99.99  | 1987            | ✓ 1987              |
| w200.005 | 439          | 0.00 | 304  | 99.70  | 745             | ✓ 746               | 444          | 0.00 | 267  | 100.00 | 1205            | ✓ 1205              | 444           | 0.68 | 288  | 100.00 | 1506            | ✓ 1506              |

†: Includes the time of GVNS.

**Table EC.12 RTSPTW( $\mathcal{T}_C$ ): Results on the instances of set GDE-I with 80 customers.**

| Instance | $\Gamma = 1$ |      |      |        |                 |                     | $\Gamma = 2$ |      |      |        |                 |                     | $\Gamma = 3$ |      |      |        |                 |                     |
|----------|--------------|------|------|--------|-----------------|---------------------|--------------|------|------|--------|-----------------|---------------------|--------------|------|------|--------|-----------------|---------------------|
|          | GVNS         |      | CSP  |        | DP              |                     | GVNS         |      | CSP  |        | DP              |                     | GVNS         |      | CSP  |        | DP              |                     |
|          | $ub^*$       | %gap | time | %lb    | time $^\dagger$ | opt time $^\dagger$ | $ub^*$       | %gap | time | %lb    | time $^\dagger$ | opt time $^\dagger$ | $ub^*$       | %gap | time | %lb    | time $^\dagger$ | opt time $^\dagger$ |
| w100.001 | inf          | -    | 1300 | -      | 1550            | ✓ 1550              | inf          | -    | 1300 | -      | 1498            | ✓ 1498              | inf          | -    | 1301 | -      | 1389            | ✓ 1389              |
| w100.002 | inf          | -    | 1299 | -      | 1986            | ✓ 1986              | inf          | -    | 1301 | -      | 1398            | ✓ 1398              | inf          | -    | 1301 | -      | 1363            | ✓ 1363              |
| w100.003 | inf          | -    | 1302 | -      | 1514            | ✓ 1514              | inf          | -    | 1300 | -      | 1435            | ✓ 1435              | inf          | -    | 1301 | -      | 1428            | ✓ 1428              |
| w100.004 | inf          | -    | 0    | -      | 0               | ✓ 0                 | inf          | -    | 0    | -      | 0               | ✓ 0                 | inf          | -    | 0    | -      | 0               | ✓ 0                 |
| w100.005 | inf          | -    | 1299 | -      | 1728            | ✓ 1728              | inf          | -    | 0    | -      | 0               | ✓ 0                 | inf          | -    | 0    | -      | 0               | ✓ 0                 |
| w120.001 | 517          | 0.00 | 264  | 100.00 | 391             | ✓ 391               | 526          | 0.00 | 468  | 100.00 | 716             | ✓ 716               | 538          | 0.00 | 687  | 100.00 | 1081            | ✓ 1081              |
| w120.002 | 578          | 0.00 | 157  | 99.91  | 199             | ✓ 199               | 581          | 0.00 | 569  | 100.00 | 665             | ✓ 665               | inf          | -    | 1301 | -      | 1538            | ✓ 1538              |
| w120.003 | 548          | 0.00 | 390  | 100.00 | 576             | ✓ 576               | 603          | 0.00 | 520  | 100.00 | 748             | ✓ 748               | inf          | -    | 1301 | -      | 2234            | ✓ 2234              |
| w120.004 | 514          | 0.39 | 418  | 99.32  | 516             | ✓ 517               | 524          | 0.00 | 746  | 99.81  | 900             | ✓ 901               | inf          | -    | 1301 | -      | 1520            | ✓ 1520              |
| w120.005 | 624          | 0.00 | 594  | 99.27  | 846             | ✓ 849               | 658          | 0.30 | 1173 | 99.83  | 1836            | ✓ 1840              | 677          | 0.15 | 1245 | 98.97  | 1792            | ✓ 1796              |
| w140.001 | 512          | 0.00 | 364  | 100.00 | 533             | ✓ 533               | 512          | 0.00 | 506  | 100.00 | 652             | ✓ 652               | ?            | -    | 1301 | -      | t.l.            | -                   |
| w140.002 | 526          | 0.19 | 412  | 98.63  | 3135            | ✓ 3153              | 545          | 0.00 | 625  | 99.72  | 6792            | ✓ 6803              | ?            | -    | 1301 | -      | t.l.            | -                   |
| w140.003 | 609          | 0.16 | 726  | 98.95  | 1019            | ✓ 1022              | 621          | 0.16 | 788  | 99.38  | 1376            | ✓ 1382              | 634          | -    | 1303 | 100.00 | 4694            | ✓ 4694              |
| w140.004 | 445          | 2.02 | 431  | 99.66  | 758             | ✓ 761               | 502          | 0.00 | 859  | 97.97  | 1750            | ✓ 1790              | inf          | -    | 1301 | -      | 1992            | ✓ 1992              |
| w140.005 | 546          | 0.00 | 456  | 100.00 | 552             | ✓ 552               | 546          | 0.00 | 666  | 100.00 | 820             | ✓ 820               | 560          | 0.00 | 731  | 100.00 | 1059            | ✓ 1059              |
| w160.001 | 514          | 0.00 | 307  | 100.00 | 873             | ✓ 873               | 530          | 0.00 | 557  | 100.00 | 1640            | ✓ 1640              | ?            | -    | 1303 | -      | t.l.            | -                   |
| w160.002 | 583          | 0.00 | 405  | 97.16  | 2447            | m.l.                | 591          | 0.00 | 743  | 99.82  | 2695            | ✓ 2701              | ?            | -    | 1302 | -      | t.l.            | -                   |
| w160.003 | 533          | 0.00 | 221  | 99.50  | 764             | ✓ 766               | 545          | 0.00 | 201  | 100.00 | 644             | ✓ 644               | 577          | 0.00 | 393  | 100.00 | 1261            | ✓ 1261              |
| w160.004 | 518          | 0.00 | 614  | 100.00 | 1058            | ✓ 1058              | 527          | 0.00 | 703  | 99.53  | 1401            | ✓ 1406              | ?            | -    | 1301 | -      | t.l.            | -                   |
| w160.005 | 465          | 0.00 | 538  | 99.35  | 1053            | ✓ 1059              | 480          | 0.00 | 795  | 99.87  | 1465            | ✓ 1465              | 495          | 0.00 | 894  | 99.39  | 1505            | ✓ 1509              |
| w180.001 | 570          | 0.18 | 169  | 99.96  | 557             | ✓ 558               | 577          | 0.00 | 152  | 100.00 | 420             | ✓ 420               | inf          | -    | 1303 | -      | 6110            | ✓ 6110              |
| w180.002 | 526          | 0.00 | 667  | 99.17  | 2102            | ✓ 2109              | 538          | 0.00 | 621  | 99.16  | 1477            | ✓ 1485              | 540          | 0.00 | 805  | 99.98  | 1852            | ✓ 1852              |
| w180.003 | 539          | 0.00 | 234  | 99.91  | 1144            | ✓ 1144              | 540          | 0.00 | 526  | 100.00 | 1186            | ✓ 1186              | ?            | -    | 1306 | -      | t.l.            | -                   |
| w180.004 | 482          | 0.00 | 261  | 99.93  | 629             | ✓ 629               | 487          | 0.00 | 385  | 99.99  | 810             | ✓ 810               | ?            | -    | 1305 | -      | t.l.            | -                   |
| w180.005 | 475          | 0.00 | 536  | 100.00 | 652             | ✓ 652               | 499          | 0.00 | 607  | 99.61  | 1353            | ✓ 1357              | inf          | -    | 1308 | -      | 3684            | ✓ 3684              |
| w200.001 | 497          | 0.20 | 111  | 99.89  | 1212            | ✓ 1219              | 507          | 0.00 | 192  | 99.65  | 1507            | ✓ 1516              | ?            | -    | 1311 | -      | t.l.            | -                   |
| w200.002 | 512          | 0.00 | 271  | 99.75  | 477             | ✓ 478               | 513          | 0.00 | 348  | 99.86  | 594             | ✓ 594               | 524          | 2.29 | 684  | 99.62  | 1792            | ✓ 1808              |
| w200.003 | 467          | 0.00 | 34   | 99.57  | 283             | ✓ 285               | 471          | 0.00 | 334  | 100.00 | 612             | ✓ 612               | 507          | 0.20 | 720  | 99.31  | 4037            | ✓ 4069              |
| w200.004 | 529          | 0.00 | 476  | 99.15  | 1017            | ✓ 1020              | 537          | 0.00 | 375  | 100.00 | 901             | ✓ 901               | inf          | -    | 1303 | -      | 7958            | ✓ 7958              |
| w200.005 | 448          | 0.89 | 413  | 99.71  | 1538            | ✓ 1542              | 472          | 0.00 | 546  | 98.48  | 2714            | ✓ 2805              | 489          | 0.20 | 484  | 97.86  | 3447            | ✓ 3695              |

m.l.: DP terminates prematurely after reaching the path limit  $M$ .

†: Includes the time of GVNS.

**Table EC.13 RTSPTW( $\mathcal{T}_C$ ): Results on the instances of set GDE-D with 60 customers.**

| Instance | $\Gamma = 1$ |      |      |        |                   |                       | $\Gamma = 7$ |      |      |        |                   |                       | $\Gamma = 12$ |      |      |        |                   |                       |
|----------|--------------|------|------|--------|-------------------|-----------------------|--------------|------|------|--------|-------------------|-----------------------|---------------|------|------|--------|-------------------|-----------------------|
|          | ub*          | GVNS |      | CSP    |                   | DP                    | ub*          | GVNS |      | CSP    |                   | DP                    | ub*           | GVNS |      | CSP    |                   | DP                    |
|          |              | %gap | time | %lb    | time <sup>†</sup> | opt time <sup>†</sup> |              | %gap | time | %lb    | time <sup>†</sup> | opt time <sup>†</sup> |               | %gap | time | %lb    | time <sup>†</sup> | opt time <sup>†</sup> |
| w120.001 | 393          | 0.00 | 78   | 99.87  | 95                | ✓ 95                  | 401          | 0.00 | 20   | 100.00 | 64                | ✓ 64                  | 401           | 0.00 | 17   | 100.00 | 109               | ✓ 109                 |
| w120.002 | 500          | 0.00 | 10   | 99.90  | 43                | ✓ 43                  | 512          | 0.00 | 204  | 99.99  | 295               | ✓ 295                 | 518           | 0.00 | 525  | 99.98  | 772               | ✓ 772                 |
| w120.003 | 407          | 0.00 | 8    | 100.00 | 47                | ✓ 47                  | 411          | 0.00 | 64   | 100.00 | 110               | ✓ 110                 | 413           | 0.00 | 174  | 100.00 | 260               | ✓ 260                 |
| w120.004 | 492          | 0.00 | 9    | 99.96  | 58                | ✓ 58                  | 492          | 0.00 | 65   | 100.00 | 166               | ✓ 166                 | 492           | 0.00 | 84   | 100.00 | 200               | ✓ 200                 |
| w120.005 | 547          | 0.00 | 11   | 100.00 | 27                | ✓ 27                  | inf          | -    | 980  | -      | 5684              | ✓ 5684                | inf           | -    | -    | -      | -                 | ✓ -                   |
| w140.001 | 423          | 0.00 | 9    | 99.76  | 38                | ✓ 38                  | 423          | 0.00 | 22   | 100.00 | 58                | ✓ 58                  | 426           | 0.00 | 22   | 100.00 | 86                | ✓ 86                  |
| w140.002 | 478          | 0.00 | 24   | 99.90  | 60                | ✓ 60                  | 478          | 0.00 | 13   | 100.00 | 101               | ✓ 101                 | ?             | -    | 980  | -      | 3235              | 3235                  |
| w140.003 | 434          | 0.00 | 9    | 100.00 | 35                | ✓ 35                  | 440          | 0.00 | 27   | 100.00 | 62                | ✓ 62                  | 441           | 0.00 | 15   | 99.77  | 54                | ✓ 55                  |
| w140.004 | 545          | 0.00 | 597  | 99.90  | 653               | ✓ 653                 | inf          | -    | 980  | -      | 1184              | ✓ 1184                | inf           | -    | 981  | -      | 1196              | ✓ 1196                |
| w140.005 | 462          | 0.00 | 28   | 99.86  | 90                | ✓ 90                  | 478          | 1.05 | 189  | 100.00 | 331               | ✓ 331                 | 486           | 0.00 | 781  | 99.63  | 923               | ✓ 925                 |
| w160.001 | 563          | 0.00 | 17   | 100.00 | 84                | ✓ 84                  | 594          | 0.00 | 57   | 100.00 | 297               | ✓ 297                 | 599           | 0.00 | 406  | 100.00 | 1185              | ✓ 1185                |
| w160.002 | 423          | 0.00 | 8    | 99.92  | 25                | ✓ 25                  | 448          | 0.00 | 13   | 100.00 | 77                | ✓ 77                  | 448           | 0.00 | 16   | 100.00 | 72                | ✓ 72                  |
| w160.003 | 434          | 0.00 | 12   | 99.32  | 111               | ✓ 111                 | 435          | 0.00 | 27   | 99.72  | 322               | ✓ 323                 | 435           | 0.00 | 127  | 100.00 | 479               | ✓ 479                 |
| w160.004 | 462          | 0.00 | 9    | 99.58  | 100               | ✓ 100                 | 462          | 0.00 | 15   | 100.00 | 202               | ✓ 202                 | 462           | 0.00 | 110  | 99.99  | 276               | ✓ 276                 |
| w160.005 | 501          | 0.00 | 10   | 100.00 | 47                | ✓ 47                  | 501          | 0.00 | 92   | 100.00 | 295               | ✓ 295                 | 501           | 0.00 | 75   | 100.00 | 414               | ✓ 414                 |
| w180.001 | 414          | 0.48 | 9    | 98.41  | 439               | ✓ 445                 | 423          | 0.00 | 16   | 98.21  | 1001              | ✓ 1017                | 431           | 0.00 | 37   | 97.88  | 1477              | ✓ 1501                |
| w180.002 | 411          | 0.00 | 12   | 99.07  | 78                | ✓ 78                  | 412          | 0.00 | 19   | 99.92  | 87                | ✓ 87                  | 414           | 0.00 | 34   | 99.98  | 132               | ✓ 132                 |
| w180.003 | 446          | 0.00 | 10   | 98.59  | 52                | ✓ 52                  | 451          | 0.00 | 62   | 99.65  | 174               | ✓ 174                 | 451           | 0.89 | 93   | 99.89  | 207               | ✓ 208                 |
| w180.004 | 463          | 0.00 | 20   | 100.00 | 94                | ✓ 94                  | 463          | 0.00 | 18   | 100.00 | 125               | ✓ 125                 | 463           | 0.00 | 23   | 100.00 | 130               | ✓ 130                 |
| w180.005 | 395          | 0.00 | 18   | 98.76  | 85                | ✓ 86                  | 408          | 0.25 | 21   | 97.75  | 362               | ✓ 389                 | 412           | 0.00 | 221  | 98.12  | 1311              | ✓ 1361                |
| w200.001 | 422          | 0.00 | 14   | 99.62  | 105               | ✓ 106                 | 423          | 0.00 | 27   | 100.00 | 144               | ✓ 144                 | 423           | 0.00 | 257  | 100.00 | 389               | ✓ 389                 |
| w200.002 | 414          | 0.00 | 10   | 100.00 | 87                | ✓ 87                  | 420          | 0.48 | 16   | 99.40  | 117               | ✓ 118                 | 420           | 0.00 | 20   | 99.40  | 98                | ✓ 99                  |
| w200.003 | 455          | 0.00 | 60   | 97.87  | 800               | ✓ 843                 | 455          | 0.00 | 72   | 99.79  | 926               | ✓ 926                 | 455           | 0.00 | 34   | 100.00 | 1033              | ✓ 1033                |
| w200.004 | 431          | 0.00 | 11   | 99.19  | 107               | ✓ 107                 | 431          | 0.00 | 63   | 99.54  | 208               | ✓ 209                 | 431           | 0.00 | 115  | 99.70  | 293               | ✓ 294                 |
| w200.005 | 427          | 0.00 | 12   | 100.00 | 182               | ✓ 182                 | 427          | 0.00 | 25   | 100.00 | 127               | ✓ 127                 | 427           | 0.00 | 28   | 100.00 | 92                | ✓ 92                  |

†: Includes the time of GVNS.

**Table EC.14 RTSPTW( $\mathcal{T}_C$ ): Results on the instances of set GDE-I with 60 customers.**

| Instance | $\Gamma = 1$ |      |      |        |                   |                       | $\Gamma = 2$ |      |      |        |                   |                       | $\Gamma = 3$ |      |      |        |                   |                       |
|----------|--------------|------|------|--------|-------------------|-----------------------|--------------|------|------|--------|-------------------|-----------------------|--------------|------|------|--------|-------------------|-----------------------|
|          | ub*          | GVNS |      | CSP    |                   | DP                    | ub*          | GVNS |      | CSP    |                   | DP                    | ub*          | GVNS |      | CSP    |                   | DP                    |
|          |              | %gap | time | %lb    | time <sup>†</sup> | opt time <sup>†</sup> |              | %gap | time | %lb    | time <sup>†</sup> | opt time <sup>†</sup> |              | %gap | time | %lb    | time <sup>†</sup> | opt time <sup>†</sup> |
| w120.001 | 424          | 2.12 | 85   | 100.00 | 130               | ✓ 130                 | 448          | 0.00 | 117  | 99.40  | 184               | ✓ 184                 | 456          | 0.00 | 200  | 100.00 | 264               | ✓ 264                 |
| w120.002 | 516          | 0.00 | 104  | 99.98  | 212               | ✓ 212                 | 521          | 0.00 | 125  | 100.00 | 164               | ✓ 164                 | inf          | -    | 979  | -      | 1056              | ✓ 1056                |
| w120.003 | 407          | 0.00 | 20   | 100.00 | 69                | ✓ 69                  | 418          | 0.00 | 73   | 100.00 | 183               | ✓ 183                 | 449          | 0.22 | 212  | 100.00 | 540               | ✓ 540                 |
| w120.004 | 492          | 0.00 | 9    | 100.00 | 52                | ✓ 52                  | 504          | 0.00 | 63   | 100.00 | 112               | ✓ 112                 | inf          | -    | 980  | -      | 1223              | ✓ 1223                |
| w120.005 | 566          | 0.00 | 14   | 100.00 | 51                | ✓ 51                  | 568          | 0.00 | 65   | 100.00 | 104               | ✓ 104                 | inf          | -    | 980  | -      | 1091              | ✓ 1091                |
| w140.001 | 423          | 0.00 | 8    | 100.00 | 34                | ✓ 34                  | 468          | 0.00 | 111  | 100.00 | 173               | ✓ 173                 | inf          | -    | 980  | -      | 1217              | ✓ 1217                |
| w140.002 | 465          | 0.00 | 31   | 100.00 | 60                | ✓ 60                  | ?            | -    | 980  | -      | 2155              | 2155                  | inf          | -    | 979  | -      | 1521              | ✓ 1521                |
| w140.003 | 436          | 0.00 | 11   | 100.00 | 35                | ✓ 35                  | 458          | 0.22 | 62   | 99.78  | 149               | ✓ 150                 | 504          | -    | 980  | 100.00 | 3696              | ✓ 3696                |
| w140.004 | inf          | -    | 979  | -      | 1136              | ✓ 1136                | inf          | -    | 979  | -      | 1042              | ✓ 1042                | inf          | -    | 979  | -      | 1034              | ✓ 1034                |
| w140.005 | 472          | 0.21 | 42   | 100.00 | 129               | ✓ 130                 | 489          | 0.20 | 324  | 100.00 | 415               | ✓ 415                 | inf          | -    | 979  | -      | 1656              | ✓ 1656                |
| w160.001 | 577          | 0.00 | 16   | 100.00 | 113               | ✓ 113                 | 597          | 0.00 | 79   | 99.12  | 606               | ✓ 607                 | 603          | 0.00 | 188  | 100.00 | 524               | ✓ 524                 |
| w160.002 | 455          | 0.00 | 9    | 100.00 | 52                | ✓ 52                  | 473          | 0.00 | 63   | 100.00 | 133               | ✓ 133                 | 496          | 0.00 | 100  | 97.92  | 360               | ✓ 365                 |
| w160.003 | 434          | 0.00 | 28   | 99.79  | 121               | ✓ 121                 | 437          | 0.00 | 69   | 100.00 | 244               | ✓ 244                 | ?            | -    | 979  | -      | 6624              | 6624                  |
| w160.004 | 464          | 0.00 | 15   | 99.92  | 91                | ✓ 91                  | 465          | 0.00 | 71   | 100.00 | 175               | ✓ 175                 | inf          | -    | 979  | -      | 1822              | ✓ 1822                |
| w160.005 | 501          | 0.00 | 17   | 100.00 | 71                | ✓ 71                  | 512          | 0.00 | 62   | 100.00 | 164               | ✓ 164                 | 522          | 0.00 | 76   | 100.00 | 207               | ✓ 207                 |
| w180.001 | 430          | 0.00 | 12   | 98.62  | 904               | ✓ 913                 | 436          | 0.00 | 20   | 99.40  | 774               | ✓ 781                 | 442          | 0.00 | 111  | 99.98  | 586               | ✓ 586                 |
| w180.002 | 414          | 0.00 | 9    | 99.03  | 101               | ✓ 101                 | 422          | 0.00 | 13   | 99.76  | 82                | ✓ 82                  | 449          | 0.00 | 63   | 100.00 | 364               | ✓ 364                 |
| w180.003 | 451          | 0.00 | 11   | 99.88  | 48                | ✓ 48                  | 451          | 2.88 | 206  | 99.89  | 312               | ✓ 313                 | 501          | 1.20 | 408  | 100.00 | 918               | ✓ 918                 |
| w180.004 | 460          | 0.00 | 13   | 100.00 | 70                | ✓ 70                  | 468          | 0.00 | 14   | 99.97  | 92                | ✓ 92                  | 471          | 3.18 | 36   | 100.00 | 504               | ✓ 504                 |
| w180.005 | 410          | 0.00 | 12   | 99.16  | 267               | ✓ 269                 | 423          | 0.00 | 277  | 100.00 | 375               | ✓ 375                 | inf          | -    | 979  | -      | 6470              | ✓ 6470                |
| w200.001 | 438          | 0.00 | 19   | 99.60  | 103               | ✓ 104                 | 451          | 0.00 | 21   | 99.41  | 171               | ✓ 171                 | 476          | 0.00 | 464  | 100.00 | 950               | ✓ 950                 |
| w200.002 | 421          | 0.00 | 9    | 99.52  | 75                | ✓ 76                  | 433          | 0.00 | 16   | 100.00 | 134               | ✓ 134                 | 465          | 4.09 | 577  | 100.00 | 1515              | ✓ 1515                |
| w200.003 | 455          | 0.00 | 60   | 98.99  | 654               | ✓ 657                 | 455          | 0.00 | 60   | 100.00 | 480               | ✓ 480                 | ?            | -    | 980  | -      | 3174              | 3174                  |
| w200.004 | 431          | 0.00 | 11   | 99.69  | 95                | ✓ 96                  | 431          | 0.00 | 109  | 100.00 | 206               | ✓ 206                 | 467          | 0.00 | 527  | 99.93  | 1079              | ✓ 1079                |
| w200.005 | 428          | 0.00 | 13   | 100.00 | 103               | ✓ 103                 | 428          | 0.00 | 17   | 100.00 | 147               | ✓ 147                 | 441          | 0.00 | 82   | 99.76  | 430               | ✓ 433                 |

†: Includes the time of GVNS.

**Table EC.15 RTSPTW( $\mathcal{T}_C$ ): Results on the instances of set GDE-D with 40 customers.**

| Instance | $\Gamma = 1$ |      |      |        |                 |                     |        |      |      | $\Gamma = 7$ |                 |                     |        |      |      |        |                 |                     | $\Gamma = 12$ |      |      |        |                 |                     |        |      |      |        |                 |                     |
|----------|--------------|------|------|--------|-----------------|---------------------|--------|------|------|--------------|-----------------|---------------------|--------|------|------|--------|-----------------|---------------------|---------------|------|------|--------|-----------------|---------------------|--------|------|------|--------|-----------------|---------------------|
|          | GVNS         |      |      | CSP    |                 |                     | DP     |      |      | GVNS         |                 |                     | CSP    |      |      | DP     |                 |                     | GVNS          |      |      | CSP    |                 |                     | DP     |      |      |        |                 |                     |
|          | $ub^*$       | %gap | time | %lb    | time $^\dagger$ | opt time $^\dagger$ | $ub^*$ | %gap | time | %lb          | time $^\dagger$ | opt time $^\dagger$ | $ub^*$ | %gap | time | %lb    | time $^\dagger$ | opt time $^\dagger$ | $ub^*$        | %gap | time | %lb    | time $^\dagger$ | opt time $^\dagger$ | $ub^*$ | %gap | time | %lb    | time $^\dagger$ | opt time $^\dagger$ |
| w120.001 | 446          | 0.00 | 1    | 100.00 | 9               | ✓ 9                 | 457    | 0.00 | 3    | 100.00       | 17              | ✓ 17                | inf    | -    | 659  | -      | 737             | ✓ 737               | inf           | -    | 659  | -      | 737             | ✓ 737               | inf    | -    | 659  | -      | 737             | ✓ 737               |
| w120.002 | 499          | 0.00 | 1    | 100.00 | 11              | ✓ 11                | inf    | -    | 659  | -            | 698             | ✓ 698               | inf    | -    | 660  | -      | 687             | ✓ 687               | inf           | -    | 660  | -      | 687             | ✓ 687               | inf    | -    | 660  | -      | 687             | ✓ 687               |
| w120.003 | 374          | 0.00 | 1    | 100.00 | 12              | ✓ 12                | 383    | 0.00 | 2    | 99.86        | 29              | ✓ 29                | 384    | 0.00 | 3    | 100.00 | 30              | ✓ 30                | 384           | 0.00 | 3    | 100.00 | 30              | ✓ 30                | 384    | 0.00 | 3    | 100.00 | 30              | ✓ 30                |
| w120.004 | 307          | 0.00 | 1    | 100.00 | 8               | ✓ 8                 | 338    | 0.00 | 160  | 100.00       | 185             | ✓ 185               | 345    | 0.29 | 336  | 100.00 | 364             | ✓ 364               | 345           | 0.29 | 336  | 100.00 | 364             | ✓ 364               | 345    | 0.29 | 336  | 100.00 | 364             | ✓ 364               |
| w120.005 | 350          | 0.00 | 1    | 100.00 | 7               | ✓ 7                 | 350    | 0.00 | 2    | 100.00       | 7               | ✓ 7                 | 350    | 0.00 | 2    | 100.00 | 7               | ✓ 7                 | 350           | 0.00 | 2    | 100.00 | 7               | ✓ 7                 | 350    | 0.00 | 2    | 100.00 | 7               | ✓ 7                 |
| w140.001 | 363          | 0.00 | 1    | 99.86  | 18              | ✓ 18                | 364    | 0.00 | 2    | 100.00       | 36              | ✓ 36                | 368    | 0.00 | 3    | 100.00 | 46              | ✓ 46                | 368           | 0.00 | 3    | 100.00 | 46              | ✓ 46                | 368    | 0.00 | 3    | 100.00 | 46              | ✓ 46                |
| w140.002 | 383          | 0.00 | 1    | 100.00 | 11              | ✓ 11                | 383    | 0.00 | 3    | 100.00       | 13              | ✓ 13                | 383    | 0.00 | 36   | 100.00 | 47              | ✓ 47                | 383           | 0.00 | 36   | 100.00 | 47              | ✓ 47                | 383    | 0.00 | 36   | 100.00 | 47              | ✓ 47                |
| w140.003 | 406          | 0.00 | 1    | 99.96  | 11              | ✓ 11                | 416    | 0.00 | 4    | 100.00       | 26              | ✓ 26                | 423    | 0.00 | 64   | 100.00 | 105             | ✓ 105               | 423           | 0.00 | 64   | 100.00 | 105             | ✓ 105               | 423    | 0.00 | 64   | 100.00 | 105             | ✓ 105               |
| w140.004 | 343          | 0.00 | 1    | 100.00 | 8               | ✓ 8                 | 365    | 0.00 | 2    | 100.00       | 18              | ✓ 18                | 365    | 0.00 | 3    | 100.00 | 24              | ✓ 24                | 365           | 0.00 | 3    | 100.00 | 24              | ✓ 24                | 365    | 0.00 | 3    | 100.00 | 24              | ✓ 24                |
| w140.005 | 371          | 0.00 | 1    | 100.00 | 12              | ✓ 12                | 392    | 0.00 | 87   | 100.00       | 130             | ✓ 130               | ?      | -    | 660  | -      | t.l.            | -                   | ?             | -    | 660  | -      | t.l.            | -                   | ?      | -    | 660  | -      | t.l.            | -                   |
| w160.001 | 359          | 0.00 | 1    | 100.00 | 11              | ✓ 11                | 360    | 0.00 | 3    | 100.00       | 17              | ✓ 17                | 360    | 0.00 | 3    | 100.00 | 18              | ✓ 18                | 360           | 0.00 | 3    | 100.00 | 18              | ✓ 18                | 360    | 0.00 | 3    | 100.00 | 18              | ✓ 18                |
| w160.002 | 337          | 0.00 | 1    | 100.00 | 8               | ✓ 8                 | 345    | 0.00 | 2    | 100.00       | 17              | ✓ 17                | 345    | 0.00 | 4    | 100.00 | 39              | ✓ 39                | 345           | 0.00 | 4    | 100.00 | 39              | ✓ 39                | 345    | 0.00 | 4    | 100.00 | 39              | ✓ 39                |
| w160.003 | 368          | 0.00 | 1    | 98.91  | 68              | ✓ 68                | 368    | 0.00 | 3    | 100.00       | 72              | ✓ 72                | 368    | 0.00 | 4    | 100.00 | 65              | ✓ 65                | 368           | 0.00 | 4    | 100.00 | 65              | ✓ 65                | 368    | 0.00 | 4    | 100.00 | 65              | ✓ 65                |
| w160.004 | 288          | 0.00 | 1    | 100.00 | 37              | ✓ 37                | 296    | 0.00 | 3    | 100.00       | 85              | ✓ 85                | 297    | 0.00 | 3    | 100.00 | 120             | ✓ 120               | 297           | 0.00 | 3    | 100.00 | 120             | ✓ 120               | 297    | 0.00 | 3    | 100.00 | 120             | ✓ 120               |
| w160.005 | 315          | 0.00 | 1    | 100.00 | 49              | ✓ 49                | 315    | 0.00 | 2    | 100.00       | 55              | ✓ 55                | 315    | 0.00 | 3    | 100.00 | 69              | ✓ 69                | 315           | 0.00 | 3    | 100.00 | 69              | ✓ 69                | 315    | 0.00 | 3    | 100.00 | 69              | ✓ 69                |
| w180.001 | 339          | 0.00 | 1    | 99.80  | 27              | ✓ 27                | 343    | 0.00 | 2    | 100.00       | 23              | ✓ 23                | 367    | 0.00 | 130  | 97.18  | 293             | ✓ 306               | 367           | 0.00 | 130  | 97.18  | 293             | ✓ 306               | 367    | 0.00 | 130  | 97.18  | 293             | ✓ 306               |
| w180.002 | 352          | 0.00 | 2    | 99.99  | 46              | ✓ 46                | 358    | 0.00 | 4    | 100.00       | 25              | ✓ 25                | 378    | 0.00 | 9    | 100.00 | 153             | ✓ 153               | 378           | 0.00 | 9    | 100.00 | 153             | ✓ 153               | 378    | 0.00 | 9    | 100.00 | 153             | ✓ 153               |
| w180.003 | 279          | 0.00 | 1    | 100.00 | 17              | ✓ 17                | 299    | 0.00 | 2    | 100.00       | 35              | ✓ 35                | 299    | 0.00 | 3    | 100.00 | 36              | ✓ 36                | 299           | 0.00 | 3    | 100.00 | 36              | ✓ 36                | 299    | 0.00 | 3    | 100.00 | 36              | ✓ 36                |
| w180.004 | 370          | 0.00 | 1    | 100.00 | 14              | ✓ 14                | 372    | 0.00 | 5    | 100.00       | 22              | ✓ 22                | 372    | 0.00 | 8    | 100.00 | 31              | ✓ 31                | 372           | 0.00 | 8    | 100.00 | 31              | ✓ 31                | 372    | 0.00 | 8    | 100.00 | 31              | ✓ 31                |
| w180.005 | 335          | 0.00 | 1    | 100.00 | 46              | ✓ 46                | 335    | 0.00 | 3    | 100.00       | 52              | ✓ 52                | 335    | 0.00 | 4    | 100.00 | 42              | ✓ 42                | 335           | 0.00 | 4    | 100.00 | 42              | ✓ 42                | 335    | 0.00 | 4    | 100.00 | 42              | ✓ 42                |
| w200.001 | 330          | 0.00 | 2    | 100.00 | 13              | ✓ 13                | 349    | 0.00 | 4    | 100.00       | 80              | ✓ 80                | 351    | 0.00 | 8    | 99.72  | 161             | ✓ 162               | 351           | 0.00 | 8    | 99.72  | 161             | ✓ 162               | 351    | 0.00 | 8    | 99.72  | 161             | ✓ 162               |
| w200.002 | 303          | 0.00 | 1    | 99.59  | 50              | ✓ 50                | 314    | 0.00 | 2    | 99.84        | 124             | ✓ 124               | 314    | 0.00 | 3    | 99.84  | 109             | ✓ 109               | 314           | 0.00 | 3    | 99.84  | 109             | ✓ 109               | 314    | 0.00 | 3    | 99.84  | 109             | ✓ 109               |
| w200.003 | 342          | 0.00 | 2    | 93.57  | 94              | ✓ 135               | 343    | 1.17 | 3    | 96.50        | 228             | ✓ 283               | 344    | 0.29 | 4    | 97.47  | 401             | ✓ 465               | 344           | 0.29 | 4    | 97.47  | 401             | ✓ 465               | 344    | 0.29 | 4    | 97.47  | 401             | ✓ 465               |
| w200.004 | 301          | 0.00 | 1    | 99.98  | 30              | ✓ 30                | 301    | 0.00 | 2    | 100.00       | 36              | ✓ 36                | 302    | 0.00 | 3    | 100.00 | 92              | ✓ 92                | 302           | 0.00 | 3    | 100.00 | 92              | ✓ 92                | 302    | 0.00 | 3    | 100.00 | 92              | ✓ 92                |
| w200.005 | 301          | 0.00 | 2    | 100.00 | 16              | ✓ 16                | 310    | 0.00 | 3    | 99.91        | 70              | ✓ 70                | 311    | 0.00 | 4    | 100.00 | 85              | ✓ 85                | 311           | 0.00 | 4    | 100.00 | 85              | ✓ 85                | 311    | 0.00 | 4    | 100.00 | 85              | ✓ 85                |

†: Includes the time of GVNS.

**Table EC.16 RTSPTW( $\mathcal{T}_C$ ): Results on the instances of set GDE-I with 40 customers.**

| Instance | $\Gamma = 1$ |      |      |        |                 |                     |        |      |      | $\Gamma = 2$ |                 |                     |        |      |      |        |                 |                     | $\Gamma = 3$ |      |      |        |                 |                     |        |      |      |        |                 |                     |
|----------|--------------|------|------|--------|-----------------|---------------------|--------|------|------|--------------|-----------------|---------------------|--------|------|------|--------|-----------------|---------------------|--------------|------|------|--------|-----------------|---------------------|--------|------|------|--------|-----------------|---------------------|
|          | GVNS         |      |      | CSP    |                 |                     | DP     |      |      | GVNS         |                 |                     | CSP    |      |      | DP     |                 |                     | GVNS         |      |      | CSP    |                 |                     | DP     |      |      |        |                 |                     |
|          | $ub^*$       | %gap | time | %lb    | time $^\dagger$ | opt time $^\dagger$ | $ub^*$ | %gap | time | %lb          | time $^\dagger$ | opt time $^\dagger$ | $ub^*$ | %gap | time | %lb    | time $^\dagger$ | opt time $^\dagger$ | $ub^*$       | %gap | time | %lb    | time $^\dagger$ | opt time $^\dagger$ | $ub^*$ | %gap | time | %lb    | time $^\dagger$ | opt time $^\dagger$ |
| w120.001 | 446          | 0.00 | 1    | 100.00 | 7               | ✓ 7                 | 446    | 0.00 | 2    | 100.00       | 10              | ✓ 10                | inf    | -    | 659  | -      | 686             | ✓ 686               | inf          | -    | 659  | -      | 686             | ✓ 686               | inf    | -    | 659  | -      | 686             | ✓ 686               |
| w120.002 | 445          | 0.00 | 1    | 100.00 | 8               | ✓ 8                 | 450    | 0.00 | 2    | 100.00       | 11              | ✓ 11                | 486    | 0.00 | 2    | 100.00 | 15              | ✓ 15                | 486          | 0.00 | 2    | 100.00 | 15              | ✓ 15                | 486    | 0.00 | 2    | 100.00 | 15              | ✓ 15                |
| w120.003 | 395          | 0.00 | 1    | 100.00 | 33              | ✓ 33                | 432    | 0.00 | 2    | 100.00       | 40              | ✓ 40                | inf    | -    | 659  | -      | 785             | ✓ 785               | inf          | -    | 659  | -      | 785             | ✓ 785               | inf    | -    | 659  | -      | 785             | ✓ 785               |
| w120.004 | 342          | 0.00 | 1    | 100.00 | 20              | ✓ 20                | 366    | 0.00 | 4    | 99.18        | 49              | ✓ 49                | inf    | -    | 659  | -      | 682             | ✓ 682               | inf          | -    | 659  | -      | 682             | ✓ 682               | inf    | -    | 659  | -      | 682             | ✓ 682               |
| w120.005 | 350          | 0.00 | 1    | 100.00 | 6               | ✓ 6                 | 366    | 0.00 | 2    | 100.00       | 37              | ✓ 37                | 417    | 0.00 | 3    | 100.00 | 36              | ✓ 36                | 417          | 0.00 | 3    | 100.00 | 36              | ✓ 36                | 417    | 0.00 | 3    | 100.00 | 36              | ✓ 36                |
| w140.001 | 366          | 0.00 | 1    | 100.00 | 12              | ✓ 12                | 366    | 0.00 | 1    | 100.00       | 13              | ✓ 13                | 392    | 0.00 | 2    | 100.00 | 31              | ✓ 31                | 392          | 0.00 | 2    | 100.00 | 31              | ✓ 31                | 392    | 0.00 | 2    | 100.00 | 31              | ✓ 31                |
| w140.002 | 383          | 0.00 | 1    | 100.00 | 10              | ✓ 10                | 383    | 0.00 | 2    | 100.00       | 12              | ✓ 12                | 394    | 0.00 | 2    | 100.00 | 18              | ✓ 18                | 394          | 0.00 | 2    | 100.00 | 18              | ✓ 18                | 394    | 0.00 | 2    | 100.00 | 18              | ✓ 18                |
| w140.003 | 416          | 0.00 | 1    | 100.00 | 12              | ✓ 12                | 417    | 0.00 | 2    | 100.00       | 8               | ✓ 8                 | inf    | -    | 660  | -      | 674             | ✓ 674               | inf          | -    | 660  | -      | 674             | ✓ 674               | inf    | -    | 660  | -      | 674             | ✓ 674               |
| w140.004 | 366          | 0.00 | 1    | 100.00 | 12              | ✓ 12                | 384    | 0.00 | 13   | 100.00       | 29              | ✓ 29                | 419    | 0.00 | 162  | 99.28  | 232             | ✓ 233               | 419          | 0.00 | 162  | 99.28  | 232             | ✓ 233               | 419    | 0.00 | 162  | 99.28  | 232             | ✓ 233               |
| w140.005 | 376          | 0.00 | 1    | 100.00 | 19              | ✓ 19                | 382    | 0.00 | 2    | 100.00       | 31              | ✓ 31                | 393    | 0.00 | 55   | 100.00 | 80              | ✓ 80                | 393          | 0.00 | 55   | 100.00 | 80              | ✓ 80                | 393    | 0.00 | 55   | 100.00 | 80              | ✓ 80                |
| w160.001 | 360          | 0.00 | 1    | 100.00 | 10              | ✓ 10                | 360    | 0.00 | 2    | 100.00       | 12              | ✓ 12                | inf    | -    | 659  | -      | 689             | ✓ 689               | inf          | -    | 659  | -      | 689             | ✓ 689               | inf    | -    | 659  | -      | 689             | ✓ 689               |
| w160.002 | 355          | 0.00 | 1    | 100.00 | 17              | ✓ 17                | 370    | 0.00 | 2    | 100.00       | 23              | ✓ 23                | inf    | -    | 659  | -      | 696             | ✓ 696               | inf          | -    | 659  | -      | 696             | ✓ 696               | inf    | -    | 659  | -      | 696             | ✓ 696               |
| w160.003 | 368          | 0.00 | 2    | 100.00 | 57              | ✓ 57                | 374    | 0.00 | 2    | 100.00       | 47              | ✓ 47                | inf    | -    | 659  | -      | 751             | ✓ 751               | inf          | -    | 659  | -      | 751             | ✓ 751               | inf    | -    | 659  | -      | 751             | ✓ 751               |
| w160.004 | 297          | 0.00 | 1    | 100.00 | 88              | ✓ 88                | 303    | 0.00 | 2    | 100.00       | 118             | ✓ 118               | 312    | 0.00 | 2    | 100.00 | 93              | ✓ 93                | 312          | 0.00 | 2    | 100.00 | 93              | ✓ 93                | 312    | 0.00 | 2    | 100.00 | 93              | ✓ 93                |
| w160.005 | 315          | 0.00 | 1    | 100.00 | 66              | ✓ 66                | 315    | 0.00 | 1    | 100.00       | 39              | ✓ 39                | 316    | 0.00 | 2    | 100.00 | 58              | ✓ 58                | 316          | 0.00 | 2    | 100.00 | 58              | ✓ 58                | 316    | 0.00 | 2    | 100.00 | 58              | ✓ 58                |
| w180.001 | 354          | 0.00 | 1    | 98.59  | 35              | ✓ 35                | 356    | 0.00 | 2    | 100.00       | 28              | ✓ 28                | 389    | 0.00 | 35   | 100.00 | 79              | ✓ 79                | 389          | 0.00 | 35   | 100.00 | 79              | ✓ 79                | 389    | 0.00 | 35   | 100.00 | 79              | ✓ 79                |
| w180.002 | 358          | 0.00 | 2    | 100.00 | 24              | ✓ 24                | 378    | 0.00 | 67   | 100.00       | 137             | ✓ 137               | 386    | 0.00 | 200  | 100.00 | 231             | ✓ 231               | 386          | 0.00 | 200  | 100.00 | 231             | ✓ 231               | 386    | 0.00 | 200  | 100.00 | 231             | ✓ 231               |
| w180.003 |              |      |      |        |                 |                     |        |      |      |              |                 |                     |        |      |      |        |                 |                     |              |      |      |        |                 |                     |        |      |      |        |                 |                     |

**Table EC.17 RTSPTW( $\mathcal{T}_C$ ): Results on the instances of set GDE-D with 20 customers.**

| Instance | $\Delta = 1$ |           |     |                   |                       |           | $\Gamma = 7$ |      |                   |                       |           |     | $\Gamma = 12$ |                   |                       |           |     |                   |                       |   |     |
|----------|--------------|-----------|-----|-------------------|-----------------------|-----------|--------------|------|-------------------|-----------------------|-----------|-----|---------------|-------------------|-----------------------|-----------|-----|-------------------|-----------------------|---|-----|
|          | ub*          | GVNS      |     | CSP               |                       | DP        | ub*          | GVNS |                   | CSP                   |           | DP  | ub*           | GVNS              |                       | CSP       |     | DP                |                       |   |     |
|          |              | %gap time | %lb | time <sup>†</sup> | opt time <sup>†</sup> | %gap time |              | %lb  | time <sup>†</sup> | opt time <sup>†</sup> | %gap time | %lb |               | time <sup>†</sup> | opt time <sup>†</sup> | %gap time | %lb | time <sup>†</sup> | opt time <sup>†</sup> |   |     |
| w120.001 | 297          | 0.00      | 0   | 100.00            | 5                     | ✓         | 5            | 313  | 0.00              | 0                     | 100.00    | 5   | ✓             | 5                 | inf                   | -         | 419 | -                 | 427                   | ✓ | 427 |
| w120.002 | 218          | 0.00      | 0   | 99.67             | 5                     | ✓         | 5            | 221  | 0.00              | 0                     | 100.00    | 4   | ✓             | 4                 | inf                   | -         | 419 | -                 | 424                   | ✓ | 424 |
| w120.003 | 303          | 0.00      | 0   | 100.00            | 4                     | ✓         | 4            | 325  | 0.00              | 0                     | 100.00    | 5   | ✓             | 5                 | 339                   | 0.00      | 0   | 100.00            | 5                     | ✓ | 5   |
| w120.004 | 321          | 0.00      | 0   | 100.00            | 5                     | ✓         | 5            | inf  | -                 | 419                   | -         | 425 | ✓             | 425               | inf                   | -         | 419 | -                 | 424                   | ✓ | 424 |
| w120.005 | 278          | 0.00      | 0   | 100.00            | 4                     | ✓         | 4            | 287  | 0.00              | 0                     | 100.00    | 5   | ✓             | 5                 | inf                   | -         | 420 | -                 | 426                   | ✓ | 426 |
| w140.001 | 176          | 0.00      | 0   | 100.00            | 4                     | ✓         | 4            | 181  | 7.18              | 0                     | 100.00    | 5   | ✓             | 5                 | 181                   | 0.00      | 0   | 100.00            | 5                     | ✓ | 5   |
| w140.002 | 272          | 0.00      | 0   | 100.00            | 4                     | ✓         | 4            | 286  | 0.00              | 0                     | 100.00    | 4   | ✓             | 4                 | 286                   | 0.00      | 0   | 100.00            | 5                     | ✓ | 5   |
| w140.003 | 236          | 0.00      | 0   | 100.00            | 5                     | ✓         | 5            | 236  | 0.00              | 0                     | 100.00    | 5   | ✓             | 5                 | 236                   | 0.00      | 0   | 100.00            | 5                     | ✓ | 5   |
| w140.004 | 273          | 0.00      | 0   | 98.72             | 8                     | ✓         | 8            | 309  | 0.00              | 63                    | 100.00    | 72  | ✓             | 72                | inf                   | -         | 419 | -                 | 431                   | ✓ | 431 |
| w140.005 | 225          | 0.00      | 0   | 100.00            | 5                     | ✓         | 5            | 228  | 0.44              | 0                     | 100.00    | 4   | ✓             | 4                 | 243                   | 0.00      | 0   | 100.00            | 4                     | ✓ | 4   |
| w160.001 | 241          | 0.00      | 0   | 100.00            | 5                     | ✓         | 5            | 245  | 0.00              | 0                     | 100.00    | 5   | ✓             | 5                 | 246                   | 0.00      | 0   | 100.00            | 5                     | ✓ | 5   |
| w160.002 | 201          | 0.00      | 0   | 100.00            | 4                     | ✓         | 4            | 201  | 0.00              | 0                     | 100.00    | 4   | ✓             | 4                 | 201                   | 0.00      | 0   | 100.00            | 4                     | ✓ | 4   |
| w160.003 | 243          | 0.00      | 0   | 98.35             | 6                     | ✓         | 6            | 270  | 0.00              | 0                     | 97.41     | 10  | ✓             | 10                | 272                   | 2.21      | 0   | 97.43             | 13                    | ✓ | 13  |
| w160.004 | 203          | 0.00      | 0   | 100.00            | 8                     | ✓         | 8            | 203  | 0.00              | 0                     | 100.00    | 7   | ✓             | 7                 | 203                   | 0.00      | 0   | 100.00            | 7                     | ✓ | 7   |
| w160.005 | 247          | 0.00      | 0   | 100.00            | 5                     | ✓         | 5            | 247  | 0.00              | 0                     | 100.00    | 4   | ✓             | 4                 | 247                   | 0.00      | 0   | 100.00            | 5                     | ✓ | 5   |
| w180.001 | 253          | 0.00      | 0   | 100.00            | 4                     | ✓         | 4            | 270  | 0.00              | 0                     | 100.00    | 5   | ✓             | 5                 | 270                   | 0.00      | 0   | 100.00            | 5                     | ✓ | 5   |
| w180.002 | 265          | 0.00      | 0   | 100.00            | 5                     | ✓         | 5            | 271  | 0.00              | 0                     | 100.00    | 4   | ✓             | 4                 | 276                   | 0.00      | 0   | 100.00            | 5                     | ✓ | 5   |
| w180.003 | 275          | 0.00      | 0   | 100.00            | 5                     | ✓         | 5            | 275  | 0.00              | 0                     | 100.00    | 5   | ✓             | 5                 | 278                   | 0.00      | 0   | 100.00            | 5                     | ✓ | 5   |
| w180.004 | 215          | 0.00      | 0   | 100.00            | 5                     | ✓         | 5            | 242  | 0.00              | 0                     | 100.00    | 6   | ✓             | 6                 | 242                   | 0.00      | 0   | 100.00            | 8                     | ✓ | 8   |
| w180.005 | 193          | 0.00      | 0   | 100.00            | 5                     | ✓         | 5            | 206  | 0.00              | 0                     | 100.00    | 5   | ✓             | 5                 | 206                   | 0.00      | 0   | 100.00            | 6                     | ✓ | 6   |
| w200.001 | 233          | 0.00      | 0   | 99.74             | 6                     | ✓         | 6            | 234  | 0.00              | 0                     | 100.00    | 5   | ✓             | 5                 | 234                   | 0.00      | 0   | 100.00            | 5                     | ✓ | 5   |
| w200.002 | 205          | 0.00      | 0   | 99.97             | 5                     | ✓         | 5            | 205  | 0.00              | 0                     | 99.96     | 5   | ✓             | 5                 | 205                   | 0.00      | 0   | 99.96             | 5                     | ✓ | 5   |
| w200.003 | 249          | 0.00      | 0   | 100.00            | 7                     | ✓         | 7            | 249  | 0.00              | 0                     | 100.00    | 6   | ✓             | 6                 | 249                   | 0.00      | 0   | 100.00            | 10                    | ✓ | 10  |
| w200.004 | 293          | 0.00      | 0   | 98.12             | 7                     | ✓         | 7            | 337  | 0.00              | 0                     | 100.00    | 10  | ✓             | 10                | inf                   | -         | 419 | -                 | 437                   | ✓ | 437 |
| w200.005 | 236          | 0.00      | 0   | 99.97             | 6                     | ✓         | 6            | 236  | 0.00              | 0                     | 100.00    | 6   | ✓             | 6                 | 236                   | 0.00      | 0   | 100.00            | 9                     | ✓ | 9   |

†: Includes the time of GVNS.

**Table EC.18 RTSPTW( $\mathcal{T}_C$ ): Results on the instances of set GDE-I with 20 customers.**

| Instance | $\Gamma = 1$ |           |     |                   | $\Gamma = 2$ |           |     |                   | $\Gamma = 3$ |           |        |                   |                       |     |     |      |     |        |     |   |     |
|----------|--------------|-----------|-----|-------------------|--------------|-----------|-----|-------------------|--------------|-----------|--------|-------------------|-----------------------|-----|-----|------|-----|--------|-----|---|-----|
|          | ub*          | GVNS      |     | DP                | ub*          | GVNS      |     | DP                | ub*          | GVNS      |        | DP                |                       |     |     |      |     |        |     |   |     |
|          |              | %gap time | %lb | time <sup>†</sup> |              | %gap time | %lb | time <sup>†</sup> |              | %gap time | %lb    | time <sup>†</sup> | opt time <sup>†</sup> |     |     |      |     |        |     |   |     |
| w120.001 | 313          | 0.00      | 0   | 100.00            | 5            | ✓         | 5   | 316               | 0.00         | 0         | 100.00 | 4                 | ✓                     | 4   | inf | -    | 419 | -      | 424 | ✓ | 424 |
| w120.002 | 224          | 0.00      | 0   | 100.00            | 5            | ✓         | 5   | 244               | 0.00         | 0         | 100.00 | 5                 | ✓                     | 5   | inf | -    | 419 | -      | 424 | ✓ | 424 |
| w120.003 | 303          | 0.00      | 0   | 100.00            | 4            | ✓         | 4   | inf               | -            | 419       | -      | 424               | ✓                     | 424 | inf | -    | 419 | -      | 423 | ✓ | 423 |
| w120.004 | 350          | 0.00      | 4   | 100.00            | 9            | ✓         | 9   | 389               | 0.00         | 0         | 100.00 | 4                 | ✓                     | 4   | inf | -    | 419 | -      | 424 | ✓ | 424 |
| w120.005 | 250          | 0.00      | 0   | 100.00            | 5            | ✓         | 5   | 301               | 0.00         | 0         | 100.00 | 5                 | ✓                     | 5   | inf | -    | 419 | -      | 424 | ✓ | 424 |
| w140.001 | 178          | 0.00      | 0   | 100.00            | 5            | ✓         | 5   | 207               | 0.00         | 0         | 100.00 | 5                 | ✓                     | 5   | 213 | 0.47 | 0   | 100.00 | 5   | ✓ | 5   |
| w140.002 | 272          | 0.00      | 0   | 100.00            | 4            | ✓         | 4   | 280               | 0.00         | 0         | 100.00 | 4                 | ✓                     | 4   | inf | -    | 419 | -      | 424 | ✓ | 424 |
| w140.003 | 236          | 0.00      | 0   | 100.00            | 4            | ✓         | 4   | 244               | 0.00         | 0         | 100.00 | 4                 | ✓                     | 4   | inf | -    | 419 | -      | 424 | ✓ | 424 |
| w140.004 | 286          | 0.00      | 0   | 97.00             | 7            | ✓         | 8   | 321               | 0.00         | 43        | 100.00 | 50                | ✓                     | 50  | inf | -    | 419 | -      | 424 | ✓ | 424 |
| w140.005 | 225          | 0.00      | 0   | 100.00            | 4            | ✓         | 4   | 225               | 0.00         | 0         | 100.00 | 4                 | ✓                     | 4   | 253 | 0.00 | 0   | 100.00 | 5   | ✓ | 5   |
| w160.001 | 245          | 0.00      | 0   | 100.00            | 5            | ✓         | 5   | 261               | 0.00         | 0         | 100.00 | 5                 | ✓                     | 5   | inf | -    | 419 | -      | 429 | ✓ | 429 |
| w160.002 | 201          | 0.00      | 0   | 100.00            | 4            | ✓         | 4   | 201               | 0.00         | 0         | 100.00 | 4                 | ✓                     | 4   | 201 | 0.00 | 0   | 100.00 | 4   | ✓ | 4   |
| w160.003 | 261          | 0.00      | 0   | 100.00            | 7            | ✓         | 7   | 275               | 0.00         | 0         | 100.00 | 5                 | ✓                     | 5   | inf | -    | 419 | -      | 425 | ✓ | 425 |
| w160.004 | 204          | 0.00      | 0   | 100.00            | 5            | ✓         | 5   | 204               | 0.00         | 0         | 100.00 | 5                 | ✓                     | 5   | 204 | 0.00 | 0   | 100.00 | 5   | ✓ | 5   |
| w160.005 | 247          | 0.00      | 0   | 100.00            | 4            | ✓         | 4   | 247               | 0.00         | 0         | 100.00 | 5                 | ✓                     | 5   | 248 | 0.00 | 0   | 100.00 | 4   | ✓ | 4   |
| w180.001 | 253          | 0.00      | 0   | 100.00            | 4            | ✓         | 4   | 262               | 0.00         | 0         | 100.00 | 4                 | ✓                     | 4   | 287 | 0.00 | 0   | 100.00 | 5   | ✓ | 5   |
| w180.002 | 276          | 0.00      | 0   | 100.00            | 4            | ✓         | 4   | 276               | 0.00         | 0         | 100.00 | 4                 | ✓                     | 4   | 276 | 0.00 | 0   | 100.00 | 4   | ✓ | 4   |
| w180.003 | 275          | 0.00      | 0   | 100.00            | 5            | ✓         | 5   | 292               | 0.00         | 0         | 100.00 | 4                 | ✓                     | 4   | inf | -    | 419 | -      | 425 | ✓ | 425 |
| w180.004 | 233          | 0.00      | 0   | 100.00            | 6            | ✓         | 6   | 243               | 0.00         | 0         | 100.00 | 7                 | ✓                     | 7   | 243 | 0.00 | 0   | 100.00 | 7   | ✓ | 7   |
| w180.005 | 193          | 0.00      | 0   | 100.00            | 4            | ✓         | 4   | 206               | 0.00         | 0         | 100.00 | 5                 | ✓                     | 5   | 207 | 0.00 | 0   | 100.00 | 5   | ✓ | 5   |
| w200.001 | 233          | 0.00      | 0   | 99.95             | 6            | ✓         | 6   | 234               | 0.00         | 0         | 100.00 | 5                 | ✓                     | 5   | 237 | 0.00 | 0   | 100.00 | 5   | ✓ | 5   |
| w200.002 | 205          | 0.00      | 0   | 99.99             | 5            | ✓         | 5   | 205               | 0.00         | 0         | 100.00 | 5                 | ✓                     | 5   | 219 | 0.00 | 0   | 100.00 | 7   | ✓ | 7   |
| w200.003 | 251          | 0.00      | 0   | 100.00            | 10           | ✓         | 10  | 271               | 0.00         | 0         | 100.00 | 11                | ✓                     | 11  | 271 | 0.00 | 0   | 100.00 | 8   | ✓ | 8   |
| w200.004 | 293          | 0.00      | 0   | 100.00            | 5            | ✓         | 5   | 322               | 0.00         | 0         | 100.00 | 10                | ✓                     | 10  | 337 | 0.00 | 0   | 100.00 | 7   | ✓ | 7   |
| w200.005 | 236          | 0.00      | 0   | 100.00            | 5            | ✓         | 5   | 236               | 0.00         | 0         | 100.00 | 5                 | ✓                     | 5   | 236 | 0.00 | 0   | 100.00 | 7   | ✓ | 7   |

†: Includes the time of GVNS.

**Table EC.19 TSPTW: Results on instances of Gendreau et al. (1998) with up to 60 customers.**

| Instance     | $n = 20$ |             |        |                      |       | $n = 40$ |             |        |                      |       | $n = 60$ |             |        |                      |        |     |   |
|--------------|----------|-------------|--------|----------------------|-------|----------|-------------|--------|----------------------|-------|----------|-------------|--------|----------------------|--------|-----|---|
|              | GVNS     |             | CSP+DP |                      |       | GVNS     |             | CSP+DP |                      |       | GVNS     |             | CSP+DP |                      |        |     |   |
|              | $ub^*$   | $\%gaptime$ | $\%lb$ | $time^{\dagger opt}$ | $opt$ | $ub^*$   | $\%gaptime$ | $\%lb$ | $time^{\dagger opt}$ | $opt$ | $ub^*$   | $\%gaptime$ | $\%lb$ | $time^{\dagger opt}$ | $opt$  |     |   |
| w120.001 267 | 0.00     | 0           | 100.00 | 1                    | ✓     | 434      | 0.00        | 1      | 100.00               | 6     | ✓        | 384         | 0.00   | 36                   | 100.00 | 57  | ✓ |
| w120.002 218 | 0.00     | 0           | 100.00 | 1                    | ✓     | 444      | 0.00        | 1      | 100.00               | 6     | ✓        | 426         | 0.00   | 9                    | 100.00 | 26  | ✓ |
| w120.003 303 | 0.00     | 0           | 100.00 | 1                    | ✓     | 357      | 0.00        | 1      | 100.00               | 5     | ✓        | 407         | 0.00   | 7                    | 100.00 | 28  | ✓ |
| w120.004 300 | 0.00     | 0           | 100.00 | 1                    | ✓     | 303      | 0.00        | 1      | 100.00               | 7     | ✓        | 490         | 0.00   | 7                    | 100.00 | 19  | ✓ |
| w120.005 240 | 0.00     | 0           | 100.00 | 1                    | ✓     | 350      | 0.00        | 1      | 100.00               | 3     | ✓        | 547         | 0.00   | 7                    | 100.00 | 27  | ✓ |
| w140.001 176 | 0.00     | 0           | 100.00 | 1                    | ✓     | 328      | 0.00        | 1      | 100.00               | 5     | ✓        | 423         | 0.00   | 7                    | 99.64  | 28  | ✓ |
| w140.002 272 | 0.00     | 0           | 100.00 | 1                    | ✓     | 383      | 0.00        | 1      | 100.00               | 6     | ✓        | 462         | 0.00   | 7                    | 99.78  | 40  | ✓ |
| w140.003 236 | 0.00     | 0           | 100.00 | 1                    | ✓     | 398      | 0.00        | 1      | 100.00               | 7     | ✓        | 427         | 0.00   | 8                    | 100.00 | 22  | ✓ |
| w140.004 255 | 0.00     | 0           | 100.00 | 2                    | ✓     | 342      | 0.00        | 1      | 100.00               | 7     | ✓        | 488         | 0.00   | 14                   | 100.00 | 41  | ✓ |
| w140.005 225 | 0.00     | 0           | 100.00 | 1                    | ✓     | 371      | 0.00        | 1      | 100.00               | 10    | ✓        | 460         | 0.00   | 17                   | 99.35  | 56  | ✓ |
| w160.001 241 | 0.00     | 0           | 100.00 | 1                    | ✓     | 348      | 0.00        | 1      | 100.00               | 6     | ✓        | 560         | 0.54   | 8                    | 99.35  | 41  | ✓ |
| w160.002 201 | 0.00     | 0           | 100.00 | 1                    | ✓     | 337      | 0.00        | 1      | 100.00               | 7     | ✓        | 423         | 0.00   | 6                    | 100.00 | 28  | ✓ |
| w160.003 201 | 0.00     | 0           | 100.00 | 1                    | ✓     | 346      | 0.00        | 1      | 100.00               | 8     | ✓        | 434         | 0.00   | 9                    | 99.82  | 32  | ✓ |
| w160.004 203 | 0.00     | 0           | 99.98  | 1                    | ✓     | 288      | 0.00        | 1      | 100.00               | 11    | ✓        | 401         | 0.00   | 7                    | 100.00 | 24  | ✓ |
| w160.005 245 | 0.00     | 0           | 100.00 | 1                    | ✓     | 315      | 0.00        | 1      | 100.00               | 10    | ✓        | 501         | 0.00   | 9                    | 100.00 | 25  | ✓ |
| w180.001 253 | 0.00     | 0           | 100.00 | 1                    | ✓     | 337      | 0.00        | 1      | 100.00               | 13    | ✓        | 411         | 0.00   | 7                    | 98.84  | 97  | ✓ |
| w180.002 265 | 0.00     | 0           | 100.00 | 1                    | ✓     | 347      | 0.00        | 1      | 100.00               | 16    | ✓        | 399         | 0.00   | 7                    | 100.00 | 19  | ✓ |
| w180.003 271 | 0.00     | 0           | 99.76  | 1                    | ✓     | 279      | 0.00        | 1      | 100.00               | 8     | ✓        | 444         | 0.00   | 10                   | 99.28  | 42  | ✓ |
| w180.004 201 | 0.00     | 0           | 100.00 | 1                    | ✓     | 354      | 0.00        | 1      | 99.72                | 13    | ✓        | 456         | 0.00   | 17                   | 99.89  | 33  | ✓ |
| w180.005 193 | 0.00     | 0           | 100.00 | 1                    | ✓     | 335      | 0.00        | 1      | 100.00               | 10    | ✓        | 395         | 0.00   | 7                    | 98.41  | 71  | ✓ |
| w200.001 233 | 0.00     | 0           | 100.00 | 4                    | ✓     | 330      | 0.00        | 1      | 100.00               | 12    | ✓        | 410         | 0.00   | 9                    | 100.00 | 33  | ✓ |
| w200.002 203 | 0.00     | 0           | 100.00 | 1                    | ✓     | 303      | 0.00        | 1      | 100.00               | 21    | ✓        | 414         | 0.00   | 13                   | 100.00 | 28  | ✓ |
| w200.003 249 | 0.00     | 0           | 100.00 | 2                    | ✓     | 339      | 0.00        | 1      | 94.43                | 53    | ✓        | 455         | 0.00   | 12                   | 97.86  | 218 | ✓ |
| w200.004 293 | 0.00     | 0           | 98.81  | 8                    | ✓     | 301      | 0.00        | 1      | 100.00               | 19    | ✓        | 431         | 0.00   | 9                    | 99.82  | 52  | ✓ |
| w200.005 227 | 0.00     | 0           | 99.73  | 1                    | ✓     | 296      | 1.35        | 1      | 100.00               | 18    | ✓        | 427         | 0.00   | 10                   | 99.87  | 42  | ✓ |

†: Includes the time of GVNS.

**Table EC.20 TSPTW: Results on instances of Gendreau et al. (1998) with 80 and 100 customers.**

| Instance     | $n = 80$ |             |        |                      | $n = 100$ |        |             |        |                      |       |   |
|--------------|----------|-------------|--------|----------------------|-----------|--------|-------------|--------|----------------------|-------|---|
|              | GVNS     |             | CSP+DP |                      | GVNS      |        | CSP+DP      |        |                      |       |   |
|              | $ub^*$   | $\%gaptime$ | $\%lb$ | $time^{\dagger opt}$ | $opt$     | $ub^*$ | $\%gaptime$ | $\%lb$ | $time^{\dagger opt}$ | $opt$ |   |
| w100.001 541 | 0.00     | 275         | 100.00 | 290                  | ✓         | 643    | 0.00        | 271    | 100.00               | 308   | ✓ |
| w100.002 567 | 0.00     | 421         | 100.00 | 439                  | ✓         | 618    | 0.00        | 405    | 100.00               | 443   | ✓ |
| w100.003 578 | 0.00     | 387         | 100.00 | 403                  | ✓         | 685    | 0.00        | 358    | 100.00               | 395   | ✓ |
| w100.004 648 | 0.00     | 409         | 100.00 | 436                  | ✓         | 684    | 0.00        | 511    | 99.96                | 540   | ✓ |
| w100.005 532 | 0.00     | 533         | 100.00 | 557                  | ✓         | 572    | 0.00        | 419    | 100.00               | 450   | ✓ |
| w120.001 498 | 0.00     | 252         | 99.89  | 276                  | ✓         | 629    | 0.32        | 217    | 99.89                | 266   | ✓ |
| w120.002 577 | 0.00     | 23          | 99.91  | 48                   | ✓         | 540    | 0.00        | 274    | 98.94                | 344   | ✓ |
| w120.003 540 | 0.00     | 200         | 100.00 | 226                  | ✓         | 615    | 0.00        | 167    | 100.00               | 239   | ✓ |
| w120.004 501 | 0.00     | 298         | 98.20  | 367                  | ✓         | 662    | 0.00        | 275    | 98.94                | 324   | ✓ |
| w120.005 591 | 0.00     | 242         | 99.41  | 284                  | ✓         | 537    | 0.00        | 221    | 100.00               | 250   | ✓ |
| w140.001 511 | 0.00     | 256         | 100.00 | 291                  | ✓         | 603    | 0.00        | 217    | 100.00               | 310   | ✓ |
| w140.002 470 | 0.64     | 211         | 99.89  | 295                  | ✓         | 613    | 0.00        | 302    | 100.00               | 355   | ✓ |
| w140.003 580 | 0.17     | 303         | 99.14  | 393                  | ✓         | 481    | 0.00        | 258    | 99.99                | 318   | ✓ |
| w140.004 422 | 0.00     | 319         | 99.64  | 370                  | ✓         | 533    | 0.00        | 224    | 100.00               | 271   | ✓ |
| w140.005 545 | 0.00     | 174         | 100.00 | 197                  | ✓         | 509    | 0.00        | 396    | 98.98                | 477   | ✓ |
| w160.001 506 | 0.00     | 149         | 100.00 | 213                  | ✓         | 582    | 0.00        | 180    | 99.91                | 246   | ✓ |
| w160.002 548 | 0.00     | 207         | 99.88  | 376                  | ✓         | 530    | 0.00        | 52     | 99.90                | 152   | ✓ |
| w160.003 521 | 0.00     | 69          | 99.99  | 119                  | ✓         | 495    | 0.00        | 220    | 100.00               | 267   | ✓ |
| w160.004 509 | 0.00     | 260         | 100.00 | 301                  | ✓         | 580    | 0.00        | 237    | 99.94                | 362   | ✓ |
| w160.005 438 | 0.00     | 181         | 100.00 | 226                  | ✓         | 586    | 0.00        | 244    | 99.83                | 321   | ✓ |
| w180.001 551 | 0.18     | 105         | 99.94  | 191                  | ✓         | 732    | 0.00        | 598    | 99.11                | 826   | ✓ |
| w180.002 478 | 0.00     | 502         | 100.00 | 582                  | ✓         | 677    | 0.59        | 779    | 98.79                | 1285  | ✓ |
| w180.003 524 | 1.53     | 151         | 100.00 | 243                  | ✓         | 747    | 0.00        | 766    | 99.96                | 983   | ✓ |
| w180.004 479 | 0.00     | 104         | 99.79  | 187                  | ✓         | 762    | 0.00        | 443    | 99.95                | 629   | ✓ |
| w180.005 470 | 0.00     | 260         | 100.00 | 319                  | ✓         | 689    | 0.15        | 494    | 99.37                | 693   | ✓ |
| w200.001 490 | 0.41     | 155         | 99.28  | 348                  | ✓         | 762    | 0.13        | 603    | 98.95                | 2608  | ✓ |
| w200.002 488 | 0.00     | 122         | 99.80  | 215                  | ✓         | 753    | 0.13        | 670    | 99.94                | 996   | ✓ |
| w200.003 464 | 0.00     | 28          | 99.54  | 115                  | ✓         | 613    | 2.94        | 946    | 99.27                | 1861  | ✓ |
| w200.004 526 | 0.00     | 209         | 99.14  | 315                  | ✓         | 676    | 0.00        | 945    | 100.00               | 1126  | ✓ |
| w200.005 439 | 0.00     | 205         | 99.85  | 263                  | ✓         | 663    | 0.15        | 735    | 99.87                | 1211  | ✓ |

†: Includes the time of GVNS.

**Table EC.21** TSPTW: Results on instances of Ohlmann and Thomas (2007) with 150 and 200 customers.

| Instance | $n = 150$ |             |                      |        |                      |   | $n = 200$ |             |                      |        |                      |   |
|----------|-----------|-------------|----------------------|--------|----------------------|---|-----------|-------------|----------------------|--------|----------------------|---|
|          | GVNS      |             |                      | CSP+DP |                      |   | GVNS      |             |                      | CSP+DP |                      |   |
|          | $ub^*$    | % $gaptime$ | $time^{\dagger opt}$ | % $lb$ | $time^{\dagger opt}$ | ✓ | $ub^*$    | % $gaptime$ | $time^{\dagger opt}$ | % $lb$ | $time^{\dagger opt}$ | ✓ |
| w120.001 | 732       | 0.00        | 598                  | 99.11  | 826                  | ✓ | 795       | 0.00        | 1109                 | 99.66  | 1461                 | ✓ |
| w120.002 | 677       | 0.59        | 779                  | 98.79  | 1285                 | ✓ | 721       | 0.14        | 1120                 | 99.71  | 1648                 | ✓ |
| w120.003 | 747       | 0.00        | 766                  | 99.96  | 983                  | ✓ | 879       | 2.39        | 1196                 | 99.70  | 2008                 | ✓ |
| w120.004 | 762       | 0.00        | 443                  | 99.95  | 629                  | ✓ | 777       | 0.00        | 1084                 | 99.98  | 1304                 | ✓ |
| w120.005 | 689       | 0.15        | 494                  | 99.37  | 693                  | ✓ | 840       | 0.12        | 1139                 | 99.34  | 4142                 | ✓ |
| w140.001 | 762       | 0.13        | 603                  | 98.95  | 2608                 | ✓ | 830       | 0.00        | 1179                 | 99.52  | 2250                 | ✓ |
| w140.002 | 753       | 0.13        | 670                  | 99.94  | 996                  | ✓ | 760       | 1.05        | 1221                 | 99.38  | 2594                 | ✓ |
| w140.003 | 613       | 2.94        | 946                  | 99.27  | 1861                 | ✓ | 758       | 0.92        | 1180                 | 99.73  | 1925                 | ✓ |
| w140.004 | 676       | 0.00        | 945                  | 100.00 | 1126                 | ✓ | 816       | 0.00        | 1238                 | 98.98  | m.1.                 |   |
| w140.005 | 663       | 0.15        | 735                  | 99.87  | 1211                 | ✓ | 822       | 0.49        | 1148                 | 99.77  | 2128                 | ✓ |
| w160.001 | 704       | 0.00        | 708                  | 99.71  | 954                  | ✓ |           |             |                      |        |                      |   |
| w160.002 | 711       | 0.00        | 673                  | 99.79  | 952                  | ✓ |           |             |                      |        |                      |   |
| w160.003 | 608       | 0.16        | 734                  | 99.26  | 1467                 | ✓ |           |             |                      |        |                      |   |
| w160.004 | 672       | 0.15        | 710                  | 99.99  | 1144                 | ✓ |           |             |                      |        |                      |   |
| w160.005 | 658       | 0.61        | 563                  | 99.58  | 887                  | ✓ |           |             |                      |        |                      |   |

m.1.: DP terminates prematurely after reaching the path limit  $M$ .  
 †: Includes the time of GVNS.

## References

- Agra, A., M. Christiansen, R. Figueiredo, L. M. Hvattum, M. Poss, C. Requejo. 2013. The robust vehicle routing problem with time windows. *Computers & Operations Research* **40** 856–866.
- Baldacci, R., A. Mingozzi., N. Christofides. 2008. An exact algorithm for the vehicle routing problem based on the set partitioning formulation with additional cuts. *Mathematical Programming, Series A* **115** 351–385.
- Baldacci, R., A. Mingozzi., R. Roberti. 2012. New state space relaxations for solving the traveling salesman problem with time windows. *INFORMS Journal on Computing* **24** 356–371.
- Gendreau, M., A. Hertz, G. Laporte, M. Stan. 1998. A generalized insertion heuristic for the traveling salesman problem with time windows. *Operations Research* **46** 330–335.
- Munari, P., A. Moreno, J. De La Vega, D. Alem, J. Gondzio, R. Morabito. 2019. The robust vehicle routing problem with time windows: Compact formulation and branch-price-and-cut method. *Transportation Science*, <https://doi.org/10.1287/trsc.2018.0886>.
- Ohlmann, J. W., B. W. Thomas. 2007. A compressed-annealing heuristic for the traveling salesman problem with time windows. *INFORMS Journal on Computing* **19** 80–90.
